# Supplementary material for: Metal-free negative linear compressibility (NLC) material – the cocrystal of 1,2-bis(4-pyridyl)ethane and fumaric acid
Source: Royal Society of Chemistry journal article supplement (doi:10.1039/d4cc02183e), 2024-01-01
Supplement: d4cc02183e2.pdf [file d4cc02183e2.pdf]

# Supporting Information

Metal-free negative linear compressibility (NLC) material -  
the cocrystal of 1,2-bis(4-pyridyl)ethane and fumaric acid

Ewa Patyk-Kaźmierczak,\* Michał Kaźmierczak

Adam Mickiewicz University in Poznań, Uniwersytetu Poznańskiego 8, 61-614 Poznań,  
Poland  
ewapatyk@amu.edu.pl

## Table of Contents

|                                                                                 |    |
|---------------------------------------------------------------------------------|----|
| Experimental details .....                                                      | 3  |
| 1. Cocrystal synthesis .....                                                    | 3  |
| 1.1. Slow evaporation .....                                                     | 3  |
| 1.2. Solvent-assisted ball milling .....                                        | 3  |
| 2. X-ray diffraction experiments.....                                           | 3  |
| 2.1. Single crystal X-ray diffraction (SCXRD).....                              | 3  |
| 2.2. Powder X-ray diffraction (PXRD) .....                                      | 4  |
| 3. Crystal structure solution .....                                             | 4  |
| 4. Principal axis strain calculations .....                                     | 4  |
| 5. Compressibility capacity calculations .....                                  | 5  |
| 6. CSD data-mining .....                                                        | 5  |
| 7. NLC comparison.....                                                          | 5  |
| 8. Theoretical calculations .....                                               | 7  |
| Tables.....                                                                     | 8  |
| 1. Experimental tables .....                                                    | 8  |
| 2. Principal axis strain calculations for ETYFUM .....                          | 12 |
| 3. Details on Negative Linear Compressibility (NLC) in selected materials ..... | 14 |
| 3.1. Lists of NLC materials selected from literature and found in CSD .....     | 14 |
| 3.2. Principal axis strain calculation for selected NLC materials .....         | 16 |
| 4. Compressibility capacity values for selected NLC materials .....             | 41 |
| 5. Wine rack motif geometry .....                                               | 42 |
| 6. H-bond energy .....                                                          | 43 |
| Figures .....                                                                   | 44 |
| 1. Sample crystals .....                                                        | 44 |
| 2. PXRD patterns .....                                                          | 46 |
| 3. Principal axis strain of ETYFUM.....                                         | 46 |
| 4. Molecular aggregation and wine rack motif geometry .....                     | 47 |
| 5. Negative Linear Compressibility .....                                        | 48 |
| 6. Compressibility capacity .....                                               | 49 |
| References.....                                                                 | 52 |

## Experimental details

### 1. Cocrystal synthesis

#### 1.1. Slow evaporation

18.4 mg of 1,2-bis(4,4'-pyridyl)ethane (ETY) and 11.6 mg of fumaric acid (FUM) (1:1 mol. ratio) were dissolved in hot methanol and then left for slow evaporation. The good quality crystals emerged after couple of days (Figures S1-S3)

#### 1.2. Solvent-assisted ball milling

61 mg of 1,2-bis(4,4'-pyridyl)ethane (ETY) and 38.9 mg of fumaric acid (FUM), ensuring 1:1 mol. ratio, were mixed and placed in a 6 ml in-house made Teflon milling cup alongside Teflon ball (5 mm in diameter) and 3  $\mu$ l of 99.8% methanol (analytically pure). Sample was then milled for 15 minutes (at 30 Hz frequency) using 400 MM ball mill from Retsch. After completion of the milling sample was measured using powder X-ray diffraction.

### 2. X-ray diffraction experiments

#### 2.1. Single crystal X-ray diffraction (SCXRD)

##### 2.1.1. Ambient conditions

A single crystal (0.46x0.17x0.09 mm) suitable for SCXRD experiment was mounted on a MiTeGen loop and measured with SuperNova four-circle single crystal diffractometer from Rigaku Oxford Diffraction, equipped in mirror monochromator, micro-focus sealed X-ray tube (Cu  $K_{\alpha}$ =1.54184 Å) and Atlas detector. Data were collected using CrysAlisPro<sup>1</sup> program at 298 K

##### 2.1.2. High-pressure

In total three sample crystals of ETYFUM (herein labelled A, B, C; see Figures S1-S3) were selected for three series of high-pressure experiments. Each crystal was loaded in a specially prepared modified Merrill-Bassett<sup>2</sup> diamond anvil cell (DAC). To prepare the DAC an opening of 0.4-0.5 mm in diameter was drilled in a steel gasket (0.3 mm thick) using spark eroding machine. It was then placed in DAC and preindentation was performed to provide tight fitting of the gasket to the diamond culets and to harden the steel. A ruby chip was placed in an opening (to allow pressure measurement) alongside cellulose fibres used to prevent crystal movement during the experiment (for crystals A and B). For crystal C a drop of epoxy glue was used to hold crystal in place and to allow its tilted positioning enabling collection of additional X-ray diffraction data. After sample crystal was placed in DAC the opening was covered with Daphne 7575 oil (ensuring hydrostatic conditions up to c.a. 4 GPa<sup>3</sup>), used as pressure-transmitting medium (PTM). The following experimental series were performed:

- (i) Sample crystal A: ETYFUM was compressed up to 3.00(2) GPa and then DAC was gradually decompressed to 2.44(2), 1.85(2), 1.25(2), 0.79(2), 0.35(2) GPa with XRD measurement at each stage (Figure S1, Table S1). Sample was then compressed rapidly to 3.78(2) GPa when destruction of sample crystal was observed (Figure S1).
- (ii) Sample crystal B: ETYFUM was compressed rapidly to 3.58(2) GPa directly after DAC loading, and then measured (Figure S2, Table S1).

(iii) Sample crystal C: ETYFUM was initially gradually compressed from ambient pressure and measured at 0.29(2), 0.53(2), 0.88(2), 1.33(2) GPa. After 1.33(2) GPa measurement sample was decompressed to ambient pressure and then compressed and measured at 0.08(2) and 0.15(2) GPa (Figure S3, Table S1)

Pressure was measured based on the shift of ruby fluorescence line<sup>4</sup> using Photon Control Inc. spectrometer (affording accuracy of about 0.02 GPa). All data were collected with four-circle single crystal Xcalibur X-ray diffractometer from Rigaku Oxford diffraction, equipped in graphite monochromator, fine-focus sealed X-ray tube (Mo  $K_{\alpha}$ =0.71073 Å) and EOS CCD detector. DAC was centred using gasket shadowing method.<sup>5</sup> For data collection program CrysAlisPro<sup>1</sup> was used.

## 2.2. Powder X-ray diffraction (PXRD)

A sample obtained after solvent-assisted ball milling was measure using Bruker D8 Advanced diffractometer equipped in copper X-ray tube ( $K_{\alpha 1}$ =1.5406 Å), Johnson monochromator and LynxEye strip detector. The scan was performed for 5-50°  $2\theta$  angle range. Data was processed using program Kdif (from Kalvados software package<sup>6</sup>), and were plotted using OriginPro 2022b<sup>7</sup> in comparison with PXRD pattern calculated based on crystal structure of ETYFUM at 298 K/0.1 MPa using program Mercury<sup>8</sup> (Figure S4).

## 3. Crystal structure solution

Program CrysAlisPro<sup>1</sup> was used for *UB*-matrix determination, data reduction and absorption corrections. All crystal structures were solved either by intrinsic phasing (with ShelXT<sup>9</sup>) or direct methods (with ShelXS<sup>10</sup>). High-pressure structural models were refined with least-squares method with ShelXL<sup>11</sup>. For all ShelX programs Olex2<sup>12</sup> was used as an interface. Structure (including hydrogen atoms) at 0.1 MPa/298 K was non-spherically refined with NoSpherA2<sup>13</sup> implemented in Olex2,<sup>12,14</sup> using Orca<sup>15</sup> (method: PBE, basis set: cc-pVTZ, multiplicity: 2). For high-pressure structures, the hydrogen atoms were located at idealized positions based on the molecular geometry and assigned isotropic thermal parameters depending on the equivalent displacement parameters of their carriers. Due to the low number of collected data (affecting data/parameter ratio) anisotropic refinement of high-pressure structures was not possible and structures were refined isotropically. All crystal structures were deposited with the Cambridge Crystallographic Data Centre (CCDC: 2340674-2340687) and can be accessed free of charge by filling out an online form at <https://www.ccdc.cam.ac.uk/structures/>. Crystallographic details for all structures are listed in Table S1.

## 4. Principal axis strain calculations

Principal axis strain calculations for ETYFUM were performed using PASCAL program<sup>16,17</sup> available at <https://www.pascalapp.co.uk/>. The ESDs on pressure values were used as weights for each data point. For the best quality data (ambient pressure crystal structure and data collected for sample crystal A) ESDs of 1 and 2 were assigned, respectively. Remaining data of poorer quality were assigned weight equal 3. All data points used for the calculations, as well as the results obtained from PASCAL are collected in Tables S2-S6. An indicatrix plot showing principal axis strain is shown in Figure S5.

Where data was available, i.e., structures were deposited in Cambridge Structural Database (CSD)<sup>18</sup> and/or unit-cell parameters were listed in original paper, program PASCAL<sup>16,17</sup> was used to calculate principal axis strain for other materials referenced in this work for comparison. It was done to ensure comparability of the results, by performing calculations in the same manner. Input data and the results can be found in Tables S9-S28. Our results and compressibility values reported in original publications are listed in Table S7.

In all cases a finite Eulerian strain was calculated and an empirical equation-of-state  $\epsilon(p) = \epsilon_0 + \lambda(p - p_c)^v$  was fitted to the strain eigenvalues. The compressibility vs. pressure plots for all NLC materials compared in this work are shown in graph in Figure S8.

## 5. Compressibility capacity calculations

To calculate compressibility capacity ( $\chi_K$ ), functions fitted by PASCAL to negative strain eigenvalues for each NLC material were exported and plotted in function of pressure. Functions were then integrated for selected minimum and maximum pressure values (for  $\Delta p$  of 0.15, 0.9, 2.0, 3.0 GPa range, and for the total pressure range each material was investigated in) using program OriginPro<sup>7</sup> (the results are shown graphically in Figures S9 and

$$\chi_K = - \int_{p_{min}}^{p_{max}} K(p) dp$$

S10). According to the definition of compressibility capacity:  $\chi_K$ , the area values obtained after integration need to be multiplied by -1, and discrepancy in pressure units should be taken into account (compressibility expressed in TPa<sup>-1</sup> plotted in function of pressure expressed in GPa). Therefore, to express  $\chi_K$  in [%], values obtained from integration were multiplied by 10<sup>-3</sup> (to allow unit conversion), and by 100 to express it in [%]. All calculated values of compressibility capacity calculated in this work are listed in Table S31.

In case of InH(BDC)<sub>2</sub><sup>19</sup> and MIL-53(Al)<sup>20</sup> no information on the unit-cell parameters was provided in the original papers, and structures were not deposited in CSD. Therefore, it was not possible to calculate principal axis strain and to access the function fitted to the strain eigenvalues. However, since, both materials exhibit significant NLC it was advisable to use them as reference. Therefore, graphs from the original papers representing compressibility values were used to read the values using an online program Graph Reader (<http://www.graphreader.com/>). Data (listed in Tables S29 and S30) were plotted using OriginPro<sup>7</sup>. Function  $y = a + bx^c$  was fitted to MIL-53(Al) data, and function  $y = a(x - b)^c$  was fitted InH(BDC)<sub>2</sub> data, to enable integral evaluation (the exact functions are listed below Tables S29 and S30). The compressibility capacity values for all NLC materials used in comparison are shown graphically in Figure 4 in the manuscript and Figure S11.

## 6. CSD data-mining

The Cambridge Structural Database (version 5.45) was data-mined by original scripts using CSD Python API<sup>18</sup> to extract high-pressure refcode families in specific crystallographic systems (triclinic, trigonal and hexagonal; all orthogonal crystal systems, i.e. orthorhombic, tetragonal and cubic were data-mined jointly). Only families containing at least 5 refcodes of unique pressure value of measurement were taken into consideration.

## 7. NLC comparison

**General remarks on NLC reporting and analysis:** To properly assess the NLC behaviour of ETYFUM (or any other crystal) in comparison to other materials, several aspects of the manner in which data were reported in the literature need to be considered. It needs to be established and clearly disclosed whether maximal (most negative) value was given or the median (the most commonly reported value and the value produced by PASCAL, a widely used principal axis strain calculator<sup>16,17</sup>). This will allow to avoid comparison of two values of a different meaning. Additionally, the number of experimental points, the intervals between them, and pressure range used for calculation of eigenvectors can affect the median value of compressibility. Therefore, it is important to state the pressure range the calculations were performed for, as well as the complete list of data points used, as omission or limitation of the data can shift the median to lower- or higher-pressure values, affecting reported median compressibility.

Compound used for comparison of compressibility were selected according to the following rules:

- 1) The results of CSD data-mining were used to create graphs representing relative changes in the unit-cell parameters to visually select crystal structures exhibiting NLC and NAC (see Table S8).
- 2) In case of inconclusive graphs, we have investigated whether one refcode family included more than one polymorph of given compound. In such cases data were analyzed individually for each crystal form, and only if at least 4 data points were reported for the NLC/NAC-exhibiting phase it was selected for further consideration and was included in Table S8.
- 3) When the same REFCODE was assigned to a crystal investigated with different PTM (eg. penetrating and non-penetrating) data were analyzed individually for each experimental series, and only if at least 4 data points were reported for the NLC/NAC-exhibiting phase it was selected for further consideration and was included in Table S8.
- 4) Out of the deposits found in CSD (selected according to the above-mentioned criteria) the organic crystals, crystals of organic-inorganic salts and metal complexes exhibiting NLC were selected for detailed analysis and calculation of compressibility with PASCAL<sup>16,17</sup> (to show how ETYFUM performs in comparison to crystals of the similar nature).
- 5) Additionally, crystals described in the literature as exhibiting “giant”, “colossal”, “large” etc. NLC were selected for detailed analysis and calculation of compressibility capacity (if lattice constants were provided and at least 4 data points were reported either in CSD or original papers, with some exceptions described below). In some cases these structures overlapped with the structures found by data mining of CSD, but were not selected for analysis in previous steps due to the nature of the crystal.
- 6) If a literature source referenced an example of organic crystal exhibiting NLC of magnitude  $-10 \text{ TPa}^{-1}$  and higher (i.e. more negative) it was also included in comparison, provided at least 4 data points were reported and lattice constants were provided either in CSD or original papers).
- 7) If structures used in analysis were deposited in CSD they are referenced by their REFCODES (Table S8). In other cases they were referenced by formulas or acronyms given in original reports.
- 8) In some cases (LUKWAS/LUKWOG, BIUREA I, OTELEH, YIHHON, VOFAN, LOCCAI), due to the low number of experimental points, compressibility calculations yielded highly uncertain results (strongly negative  $K$  values accompanied by no or extremely high ESDs). For this reason, although compressibility was initially calculated for these materials they were excluded from further analysis (including calculation of compressibility capacity) and comparison. If calculated compressibility value for the lowest pressure given material was investigated in was close to 0, but accompanied by high ESD it was included in the analysis. The exception was made for  $\text{Ag}_3[\text{Co}(\text{CN})_6]$  Phase I, CPOS-1 and water@CPOS-1, where low number of experimental data yielded results without ESDs. Still effects reported for these materials were so exceptional it was decided they should be analyzed in context of NLC in ETYFUM.
- 9) In total, NLC effects in 17 materials (including ETYFUM and treating each polymorph exhibiting NLC as an individual material) were used for comparison and compressibility capacity calculations.
- 10) For compressibility capacity comparison, the literature data reported by Cairns and Goodwin in their review<sup>21</sup> for some of the materials referenced by us were also included in discussion (Figures 4 and S11).
- 11) The following widths of pressure range were selected for compressibility capacity calculation:
  - 0.15 GPa (to allow comparison to  $\text{Ag}_3[\text{Co}(\text{CN})_6]$  Phase I)
  - 0.90 GPa (to allow comparison to MAGVOG I, and at the same time as 0.9 GPa is close to 1 GPa, one of the pressure limits considered relevant industrially if 0.1 MPa is considered the lower pressure limit)

- 2 GPa (the higher limit considered as industrially relevant if 0.1 MPa is considered the lower pressure limit)
- 3 GPa
- The entire pressure range each material was investigated in (according to data provided in literature)

Note these bins do not apply to all NLC materials analyzed herein, as some compounds were investigated in a pressure ranges more narrow than the ones selected.

## 8. Theoretical calculations

In order to assess the H-bond energy of the two types of hydrogen bonds (O-H...N and C-H...O) that play role in the molecular aggregation of the ETY and FUM molecules in ETYFUM crystal, the complexation energy was calculated (using counterpoise method) for two aggregates of the cofomers (generated based on crystal structure at 298 K/0.1 MPa and shown in Table S34). Program GaussView 6.1.1,<sup>22</sup> Gaussian 16,<sup>23</sup> and hf/3-21g basis set was used for calculations. The results are listed in Table S34.

## Tables

### 1. Experimental tables

Table S1. Experimental and crystallographic details for ETYFUM. For all structures:  $C_{12}H_{12}N_2 \cdot C_4H_4O_4$ ,  $M_r = 300.31$ , monoclinic,  $I2/a$ ,  $Z = 4$ ,  $F(000) = 632$ . Experiments were carried out at 298 K.

|                                                                            | etyfum                                                                           | etyfum_008                                                                       | etyfum_015                                                             | etyfum_029                                                                       |
|----------------------------------------------------------------------------|----------------------------------------------------------------------------------|----------------------------------------------------------------------------------|------------------------------------------------------------------------|----------------------------------------------------------------------------------|
| Crystal data                                                               |                                                                                  |                                                                                  |                                                                        |                                                                                  |
| Sample crystal                                                             | N.A                                                                              | C                                                                                | C                                                                      | C                                                                                |
| Pressure (GPa)                                                             | 0.0001(2)                                                                        | 0.08(2)                                                                          | 0.15(2)                                                                | 0.29(2)                                                                          |
| Type of experiment                                                         | N.A                                                                              | Compression                                                                      | Compression                                                            | Compression                                                                      |
| $a, b, c$ (Å)                                                              | 16.6937 (2), 4.8165 (1), 19.6871 (3)                                             | 16.68 (4), 4.7884 (10), 19.65 (5)                                                | 16.72 (3), 4.7728 (7), 19.70 (4)                                       | 16.70 (3), 4.7020 (6), 19.65 (4)                                                 |
| $\beta$ (°)                                                                | 109.083 (2)                                                                      | 109.1 (3)                                                                        | 110.1 (2)                                                              | 110.1 (3)                                                                        |
| $V$ (Å <sup>3</sup> )                                                      | 1495.96 (5)                                                                      | 1483 (6)                                                                         | 1476 (4)                                                               | 1449 (5)                                                                         |
| Radiation type                                                             | Cu $K\alpha$                                                                     | Mo $K\alpha$                                                                     | Mo $K\alpha$                                                           | Mo $K\alpha$                                                                     |
| $\mu$ (mm <sup>-1</sup> )                                                  | 0.81                                                                             | 0.10                                                                             | 0.10                                                                   | 0.10                                                                             |
| Crystal size (mm)                                                          | 0.46 × 0.17 × 0.09                                                               | 0.33 × 0.22 × 0.03                                                               | 0.33 × 0.22 × 0.03                                                     | 0.31 × 0.2 × 0.03                                                                |
| Data collection                                                            |                                                                                  |                                                                                  |                                                                        |                                                                                  |
| Diffractometer                                                             | SuperNova, Atlas                                                                 | Xcalibur, Eos                                                                    | Xcalibur, Eos                                                          | Xcalibur, Eos                                                                    |
| Absorption corr.                                                           | Analytical <sup>a</sup>                                                          | Gaussian <sup>b</sup>                                                            | Gaussian <sup>b</sup>                                                  | Gaussian <sup>b</sup>                                                            |
| $T_{\min}, T_{\max}$                                                       | 0.799, 0.936                                                                     | 0.403, 0.453                                                                     | 0.403, 0.453                                                           | 0.406, 0.452                                                                     |
| No. of measured, independent and observed [ $I > 2\sigma(I)$ ] reflections | 12205, 1548, 1421                                                                | 1576, 328, 135                                                                   | 1360, 315, 123                                                         | 2621, 361, 171                                                                   |
| $R_{\text{int}}$                                                           | 0.027                                                                            | 0.094                                                                            | 0.068                                                                  | 0.098                                                                            |
| $(\sin \theta/\lambda)_{\text{max}}$ (Å <sup>-1</sup> )                    | 0.630                                                                            | 0.639                                                                            | 0.678                                                                  | 0.635                                                                            |
| Refinement                                                                 |                                                                                  |                                                                                  |                                                                        |                                                                                  |
| $R[F^2 > 2\sigma(F^2)], wR(F^2), S$                                        | 0.019, 0.052, 1.08                                                               | 0.068, 0.168, 1.02                                                               | 0.068, 0.169, 1.02                                                     | 0.067, 0.184, 1.07                                                               |
| No. of reflections                                                         | 1548                                                                             | 328                                                                              | 315                                                                    | 361                                                                              |
| No. of parameters                                                          | 173                                                                              | 45                                                                               | 45                                                                     | 45                                                                               |
| No. of restraints                                                          | 0                                                                                | 1                                                                                | 3                                                                      | 2                                                                                |
| H-atom treatment                                                           | All H-atom parameters refined                                                    | H-atom parameters constrained                                                    | H-atom parameters constrained                                          | H-atom parameters constrained                                                    |
| Weighting scheme                                                           | $w = 1/[\sigma^2(F_o^2) + (0.0264P)^2 + 0.1012P]$ where $P = (F_o^2 + 2F_c^2)/3$ | $w = 1/[\sigma^2(F_o^2) + (0.0481P)^2 + 2.6463P]$ where $P = (F_o^2 + 2F_c^2)/3$ | $w = 1/[\sigma^2(F_o^2) + (0.0716P)^2]$ where $P = (F_o^2 + 2F_c^2)/3$ | $w = 1/[\sigma^2(F_o^2) + (0.0606P)^2 + 3.1946P]$ where $P = (F_o^2 + 2F_c^2)/3$ |
| $\Delta\rho_{\text{max}}, \Delta\rho_{\text{min}}$ (e Å <sup>-3</sup> )    | 0.12, -0.10                                                                      | 0.17, -0.12                                                                      | 0.13, -0.18                                                            | 0.13, -0.18                                                                      |

Table S1. Experimental and crystallographic details for ETYFUM. For all structures:  $C_{12}H_{12}N_2 \cdot C_4H_4O_4$ ,  $M_r = 300.31$ , monoclinic,  $I2/a$ ,  $Z = 4$ ,  $F(000) = 632$ . Experiments were carried out at 298 K- *continuation*.

|  | etyfum_035 | etyfum_053 | etyfum_079 |
|--|------------|------------|------------|
|--|------------|------------|------------|



| Crystal data                                                               |                                                                           |                                                                                    |                                                                          |
|----------------------------------------------------------------------------|---------------------------------------------------------------------------|------------------------------------------------------------------------------------|--------------------------------------------------------------------------|
| Sample crystal                                                             | A                                                                         | C                                                                                  | A                                                                        |
| Pressure (GPa)                                                             | 0.35(2)                                                                   | 0.53(2)                                                                            | 0.79(2)                                                                  |
| Type of experiment                                                         | Decompression                                                             | Compression                                                                        | Decompression                                                            |
| $a, b, c$ (Å)                                                              | 16.686 (12), 4.6593 (13), 19.75 (3)                                       | 16.73 (3), 4.5924 (6), 19.74 (4)                                                   | 16.758 (12), 4.5205 (17), 19.83 (2)                                      |
| $\beta$ (°)                                                                | 110.45 (12)                                                               | 110.9 (3)                                                                          | 111.80 (11)                                                              |
| $V$ (Å <sup>3</sup> )                                                      | 1439 (2)                                                                  | 1417 (5)                                                                           | 1394 (2)                                                                 |
| Radiation type                                                             | Mo $K\alpha$                                                              | Mo $K\alpha$                                                                       | Mo $K\alpha$                                                             |
| $\mu$ (mm <sup>-1</sup> )                                                  | 0.10                                                                      | 0.10                                                                               | 0.10                                                                     |
| Crystal size (mm)                                                          | 0.22 × 0.19 × 0.04                                                        | 0.31 × 0.2 × 0.03                                                                  | 0.22 × 0.19 × 0.04                                                       |
| Data collection                                                            |                                                                           |                                                                                    |                                                                          |
| Diffractometer                                                             | Xcalibur, Eos                                                             | Xcalibur, Eos                                                                      | Xcalibur, Eos                                                            |
| Absorption corr.                                                           | Gaussian <sup>b</sup>                                                     | Analytical <sup>a</sup>                                                            | Gaussian <sup>b</sup>                                                    |
| $T_{\min}, T_{\max}$                                                       | 0.996, 0.997                                                              | 0.997, 0.998                                                                       | 0.995, 0.996                                                             |
| No. of measured, independent and observed [ $I > 2\sigma(I)$ ] reflections | 1080, 329, 180                                                            | 3104, 401, 200                                                                     | 937, 308, 185                                                            |
| $R_{\text{int}}$                                                           | 0.075                                                                     | 0.085                                                                              | 0.079                                                                    |
| $(\sin \theta/\lambda)_{\text{max}}$ (Å <sup>-1</sup> )                    | 0.622                                                                     | 0.639                                                                              | 0.604                                                                    |
| Refinement                                                                 |                                                                           |                                                                                    |                                                                          |
| $R[F^2 > 2\sigma(F^2)], wR(F^2), S$                                        | 0.089, 0.267, 1.00                                                        | 0.076, 0.180, 1.03                                                                 | 0.085, 0.264, 1.04                                                       |
| No. of reflections                                                         | 329                                                                       | 401                                                                                | 308                                                                      |
| No. of parameters                                                          | 46                                                                        | 45                                                                                 | 46                                                                       |
| No. of restraints                                                          | 0                                                                         | 2                                                                                  | 0                                                                        |
| H-atom treatment                                                           | H-atom parameters constrained                                             | H-atom parameters constrained                                                      | H-atom parameters constrained                                            |
| Weighting scheme                                                           | $w = 1/[\sigma^2(F_o^2) + (0.1591P)^2]$<br>where $P = (F_o^2 + 2F_c^2)/3$ | $w = 1/[\sigma^2(F_o^2) + (0.061P)^2 + 3.5496P]$<br>where $P = (F_o^2 + 2F_c^2)/3$ | $w = 1/[\sigma^2(F_o^2) + (0.166P)^2]$<br>where $P = (F_o^2 + 2F_c^2)/3$ |
| $\Delta\rho_{\text{max}}, \Delta\rho_{\text{min}}$ (e Å <sup>-3</sup> )    | 0.21, -0.17                                                               | 0.16, -0.20                                                                        | 0.20, -0.17                                                              |

Table S1. Experimental and crystallographic details for ETYFUM. For all structures:  $C_{12}H_{12}N_2 \cdot C_4H_4O_4$ ,  $M_r = 300.31$ , monoclinic,  $I2/a$ ,  $Z = 4$ ,  $F(000) = 632$ . Experiments were carried out at 298 K- *continuation*.

|                                                                                     | etyfum_088                                                                                         | etyfum_125                                                                               | etyfum_133                                                                          | etyfum_185                                                                               |
|-------------------------------------------------------------------------------------|----------------------------------------------------------------------------------------------------|------------------------------------------------------------------------------------------|-------------------------------------------------------------------------------------|------------------------------------------------------------------------------------------|
| Crystal data                                                                        |                                                                                                    |                                                                                          |                                                                                     |                                                                                          |
| Sample crystal                                                                      | C                                                                                                  | A                                                                                        | C                                                                                   | A                                                                                        |
| Pressure (GPa)                                                                      | 0.88(2)                                                                                            | 1.25(2)                                                                                  | 1.33(2)                                                                             | 1.85(2)                                                                                  |
| Type of experiment                                                                  | Compression                                                                                        | Decompression                                                                            | Compression                                                                         | Decompression                                                                            |
| $a, b, c$ (Å)                                                                       | 16.72 (2), 4.4815 (7),<br>19.84 (3)                                                                | 16.758 (8), 4.3755<br>(10), 19.955 (11)                                                  | 16.79 (9), 4.3174<br>(13), 19.94 (9)                                                | 16.808 (6), 4.2460 (8),<br>20.027 (8)                                                    |
| $\beta$ (°)                                                                         | 111.79 (18)                                                                                        | 113.05 (6)                                                                               | 113.2 (6)                                                                           | 114.38 (5)                                                                               |
| $V$ (Å <sup>3</sup> )                                                               | 1380 (3)                                                                                           | 1346.4 (11)                                                                              | 1329 (11)                                                                           | 1301.8 (8)                                                                               |
| $\mu$ (mm <sup>-1</sup> )                                                           | 0.11                                                                                               | 0.11                                                                                     | 0.11                                                                                | 0.11                                                                                     |
| Crystal size (mm)                                                                   | 0.31 × 0.2 × 0.03                                                                                  | 0.22 × 0.19 × 0.04                                                                       | 0.31 × 0.2 × 0.03                                                                   | 0.24 × 0.20 × 0.04                                                                       |
| Data collection                                                                     |                                                                                                    |                                                                                          |                                                                                     |                                                                                          |
| Absorption corr.                                                                    | Gaussian <sup>b</sup>                                                                              | Gaussian <sup>b</sup>                                                                    | Gaussian <sup>b</sup>                                                               | Gaussian <sup>b</sup>                                                                    |
| $T_{\min}, T_{\max}$                                                                | 0.397, 0.452                                                                                       | 0.995, 0.996                                                                             | 0.403, 0.452                                                                        | 0.995, 0.996                                                                             |
| No. of measured,<br>independent and<br>observed [ $I > 2\sigma(I)$ ]<br>reflections | 2493, 420, 192                                                                                     | 2212, 347, 228                                                                           | 2369, 356, 158                                                                      | 2475, 351, 218                                                                           |
| $R_{\text{int}}$                                                                    | 0.102                                                                                              | 0.083                                                                                    | 0.142                                                                               | 0.088                                                                                    |
| $(\sin \theta/\lambda)_{\text{max}}$ (Å <sup>-1</sup> )                             | 0.637                                                                                              | 0.610                                                                                    | 0.633                                                                               | 0.609                                                                                    |
| Refinement                                                                          |                                                                                                    |                                                                                          |                                                                                     |                                                                                          |
| $R[F^2 > 2\sigma(F^2)],$<br>$wR(F^2), S$                                            | 0.086, 0.228, 1.06                                                                                 | 0.066, 0.192, 1.06                                                                       | 0.067, 0.183, 1.00                                                                  | 0.059, 0.198, 1.13                                                                       |
| No. of reflections                                                                  | 420                                                                                                | 347                                                                                      | 356                                                                                 | 351                                                                                      |
| No. of parameters                                                                   | 45                                                                                                 | 46                                                                                       | 45                                                                                  | 46                                                                                       |
| No. of restraints                                                                   | 2                                                                                                  | 0                                                                                        | 1                                                                                   | 0                                                                                        |
| Weighting scheme                                                                    | $w = 1/[\sigma^2(F_o^2) +$<br>$(0.0829P)^2 +$<br>$1.6991P]$<br>where $P = (F_o^2 +$<br>$2F_c^2)/3$ | $w = 1/[\sigma^2(F_o^2) +$<br>$(0.1124P)^2 + 1.7845P]$<br>where $P = (F_o^2 + 2F_c^2)/3$ | $w = 1/[\sigma^2(F_o^2) +$<br>$(0.0654P)^2]$<br>where $P = (F_o^2 +$<br>$2F_c^2)/3$ | $w = 1/[\sigma^2(F_o^2) +$<br>$(0.0998P)^2 + 1.2687P]$<br>where $P = (F_o^2 + 2F_c^2)/3$ |
| $\Delta\rho_{\text{max}}, \Delta\rho_{\text{min}}$ (e Å <sup>-3</sup> )             | 0.15, -0.18                                                                                        | 0.18, -0.23                                                                              | 0.12, -0.13                                                                         | 0.20, -0.21                                                                              |

Table S1. Experimental and crystallographic details for ETYFUM. For all structures:  $C_{12}H_{12}N_2 \cdot C_4H_4O_4$ ,  $M_r = 300.31$ , monoclinic,  $I2/a$ ,  $Z = 4$ ,  $F(000) = 632$ . Experiments were carried out at 298 K- *continuation*.

|                                                                            | etyfum_244                                                                | etyfum_300                                                                | etyfum_358                                                                |
|----------------------------------------------------------------------------|---------------------------------------------------------------------------|---------------------------------------------------------------------------|---------------------------------------------------------------------------|
| Crystal data                                                               |                                                                           |                                                                           |                                                                           |
| Sample crystal                                                             | A                                                                         | A                                                                         | B                                                                         |
| Pressure (GPa)                                                             | 2.44(2)                                                                   | 3.00(2)                                                                   | 3.58(2)                                                                   |
| Type of experiment                                                         | Decompression                                                             | Compression                                                               | Compression                                                               |
| $a, b, c$ (Å)                                                              | 16.836 (10), 4.1496 (11),<br>20.120 (14)                                  | 16.874 (16), 4.0560 (16),<br>20.17 (2)                                    | 16.89 (5), 3.9930 (4),<br>20.19 (5)                                       |
| $\beta$ (°)                                                                | 115.18 (8)                                                                | 116.14 (13)                                                               | 115.9 (4)                                                                 |
| $V$ (Å <sup>3</sup> )                                                      | 1272.0 (14)                                                               | 1239 (2)                                                                  | 1225 (6)                                                                  |
| $\mu$ (mm <sup>-1</sup> )                                                  | 0.11                                                                      | 0.12                                                                      | 0.12                                                                      |
| Crystal size (mm)                                                          | 0.22 × 0.19 × 0.04                                                        | 0.22 × 0.19 × 0.04                                                        | 0.34 × 0.26 × 0.05                                                        |
| Data collection                                                            |                                                                           |                                                                           |                                                                           |
| Absorption corr.                                                           | Analytical <sup>a</sup>                                                   | Gaussian <sup>b</sup>                                                     | Gaussian <sup>b</sup>                                                     |
| $T_{\min}, T_{\max}$                                                       | 0.995, 0.996                                                              | 0.995, 0.996                                                              | 0.396, 0.450                                                              |
| No. of measured, independent and observed [ $I > 2\sigma(I)$ ] reflections | 1394, 327, 173                                                            | 688, 269, 158                                                             | 1236, 205, 98                                                             |
| $R_{\text{int}}$                                                           | 0.091                                                                     | 0.089                                                                     | 0.083                                                                     |
| $(\sin \theta/\lambda)_{\text{max}}$ (Å <sup>-1</sup> )                    | 0.612                                                                     | 0.604                                                                     | 0.663                                                                     |
| Refinement                                                                 |                                                                           |                                                                           |                                                                           |
| $R[F^2 > 2\sigma(F^2)], wR(F^2), S$                                        | 0.070, 0.236, 1.07                                                        | 0.061, 0.157, 1.08                                                        | 0.083, 0.279, 1.10                                                        |
| No. of reflections                                                         | 327                                                                       | 269                                                                       | 205                                                                       |
| No. of parameters                                                          | 46                                                                        | 46                                                                        | 34                                                                        |
| No. of restraints                                                          | 0                                                                         | 0                                                                         | 3                                                                         |
| Weighting scheme                                                           | $w = 1/[\sigma^2(F_o^2) + (0.1175P)^2]$<br>where $P = (F_o^2 + 2F_c^2)/3$ | $w = 1/[\sigma^2(F_o^2) + (0.0548P)^2]$<br>where $P = (F_o^2 + 2F_c^2)/3$ | $w = 1/[\sigma^2(F_o^2) + (0.1618P)^2]$<br>where $P = (F_o^2 + 2F_c^2)/3$ |
| $\Delta\rho_{\text{max}}, \Delta\rho_{\text{min}}$ (e Å <sup>-3</sup> )    | 0.23, -0.31                                                               | 0.14, -0.15                                                               | 0.16, -0.14                                                               |

<sup>a</sup> *CrysAlis PRO* 1.171.41.93a (Rigaku Oxford Diffraction, 2020) Analytical numeric absorption correction using a multifaceted crystal model based on expressions derived by R.C. Clark & J.S. Reid. (Clark, R. C. & Reid, J. S. (1995). *Acta Cryst. A* 51, 887-897) Empirical absorption correction using spherical harmonics, implemented in SCALE3 ABSPACK scaling algorithm.

<sup>b</sup> *CrysAlis PRO* 1.171.41.93a (Rigaku Oxford Diffraction, 2020) Numerical absorption correction based on gaussian integration over a multifaceted crystal model (Absorb Angel (2004) *J. Appl. Cryst.* 37:486-492)

Computer programs: *CrysAlis PRO* 1.171.41.93a (Rigaku OD, 2020), *SHELXT* 2014/4 (Sheldrick, 2014), *SHELXT* (Sheldrick, 2015), *SHELXS* (Sheldrick, 2008), *SHELXL* 2014/7 (Sheldrick, 2015), *Olex2* 1.5 (Dolomanov *et al.*, 2009), *olex2.refine* 1.5 (Bourhis *et al.*, 2015).

## 2. Principal axis strain calculations for ETYFUM

Table S2. Principal axis strain calculation output for ETYFUM (0.1 MPa-3.58 GPa pressure range).

| Axes           | $K$ (TPa <sup>-1</sup> ) | $\sigma K$ (TPa <sup>-1</sup> ) | Direction |     |         | Empirical parameters |           |         |        |
|----------------|--------------------------|---------------------------------|-----------|-----|---------|----------------------|-----------|---------|--------|
|                |                          |                                 | $a$       | $b$ | $c$     | $\epsilon_0$         | $\lambda$ | $p_c$   | $\nu$  |
| X <sub>1</sub> | 68.013                   | 2.2443                          | -0.0      | 1.0 | -0.0    | 152.8631             | -152.8235 | -1.3111 | 0.0009 |
| X <sub>2</sub> | 27.8274                  | 1.8883                          | 0.7788    | 0.0 | 0.6273  | 73.4964              | -73.5008  | -0.9098 | 0.0006 |
| X <sub>3</sub> | -24.3616                 | 0.9754                          | 0.7292    | 0.0 | -0.6843 | -75.3736             | 75.3449   | -1.6144 | 0.0008 |
| V              | 54.0133                  | 4.1208                          |           |     |         |                      |           |         |        |

Table S3. Birch-Murnaghan coefficients for ETYFUM all data (0.1 MPa-3.58 GPa pressure range).

|     | $B_0$ (GPa) | $\sigma B_0$ (GPa) | $V_0$ (Å <sup>3</sup> ) | $\sigma V_0$ (Å <sup>3</sup> ) | $B'$   | $\sigma B'$ | $p_c$ (GPa) |
|-----|-------------|--------------------|-------------------------|--------------------------------|--------|-------------|-------------|
| 2nd | 11.2529     | 0.4323             | 1487.528                | 5.3724                         | 4.0    | n/a         | 0.0         |
| 3rd | 7.3076      | 0.8266             | 1498.1606               | 5.3212                         | 9.1543 | 1.4172      | 0.0         |

Table S4. Compressibility  $K$  (TPa<sup>-1</sup>) for ETYFUM (0.1 MPa-3.58 GPa pressure range).

| $p$ (GPa) | $K_1$ (TPa <sup>-1</sup> ) | $K_2$ (TPa <sup>-1</sup> ) | $K_3$ (TPa <sup>-1</sup> ) | $\sigma K_1$ (TPa <sup>-1</sup> ) | $\sigma K_2$ (TPa <sup>-1</sup> ) | $\sigma K_3$ (TPa <sup>-1</sup> ) |
|-----------|----------------------------|----------------------------|----------------------------|-----------------------------------|-----------------------------------|-----------------------------------|
| 0.0001    | 108.9387                   | 51.9632                    | -36.2692                   | 9.7938                            | 11.1588                           | 5.9181                            |
| 0.08      | 102.6872                   | 47.7713                    | -34.5602                   | 6.8996                            | 7.3013                            | 4.5406                            |
| 0.15      | 97.7719                    | 44.618                     | -33.1902                   | 5.0508                            | 4.987                             | 3.5899                            |
| 0.29      | 89.2302                    | 39.415                     | -30.7521                   | 2.8531                            | 2.4037                            | 2.2456                            |
| 0.35      | 86.01                      | 37.539                     | -29.8136                   | 2.4141                            | 1.9347                            | 1.8529                            |
| 0.53      | 77.6084                    | 32.8489                    | -27.3129                   | 2.1512                            | 1.7655                            | 1.1769                            |
| 0.79      | 68.013                     | 27.8274                    | -24.3616                   | 2.2443                            | 1.8883                            | 0.9754                            |
| 0.88      | 65.2219                    | 26.429                     | -23.4833                   | 2.1957                            | 1.8422                            | 0.9686                            |
| 1.25      | 55.8073                    | 21.9041                    | -20.4522                   | 1.6967                            | 1.4246                            | 0.9118                            |
| 1.33      | 54.1184                    | 21.1222                    | -19.8969                   | 1.57                              | 1.3254                            | 0.8936                            |
| 1.85      | 45.2235                    | 17.1447                    | -16.9126                   | 1.2383                            | 0.9978                            | 0.8976                            |
| 2.44      | 38.1164                    | 14.1268                    | -14.4533                   | 2.0496                            | 1.3592                            | 1.2517                            |
| 3.0       | 33.1695                    | 12.1047                    | -12.7005                   | 2.9582                            | 1.83                              | 1.6958                            |
| 3.58      | 29.2396                    | 10.5419                    | -11.2834                   | 3.7424                            | 2.2297                            | 2.1213                            |

Table S5. The percentage change in the length of principal axes on compression (for experimental and calculated values)

| $p$ (GPa) | Experimental |           |           | Calculated       |                  |                  |
|-----------|--------------|-----------|-----------|------------------|------------------|------------------|
|           | $X_1$ (%)    | $X_2$ (%) | $X_3$ (%) | $X_{1,calc}$ (%) | $X_{2,calc}$ (%) | $X_{3,calc}$ (%) |
| 0.0001    | -0.0         | 0.0       | 0.0       | 0.0921           | 0.0008           | -0.0591          |
| 0.08      | -0.5851      | -0.199    | -0.082    | -0.7528          | -0.3972          | 0.2237           |
| 0.15      | -0.9114      | -1.1396   | 0.7471    | -1.4542          | -0.7203          | 0.4608           |
| 0.29      | -2.4055      | -1.3324   | 0.5671    | -2.7614          | -1.3071          | 0.9079           |
| 0.35      | -3.317       | -1.562    | 1.003     | -3.287           | -1.5378          | 1.0896           |
| 0.53      | -4.7607      | -1.997    | 1.3788    | -4.7569          | -2.1694          | 1.6031           |
| 0.79      | -6.3336      | -2.8143   | 2.2615    | -6.6445          | -2.9546          | 2.2734           |
| 0.88      | -7.1958      | -2.9072   | 2.1795    | -7.2439          | -3.1987          | 2.4886           |
| 1.25      | -9.5709      | -4.1065   | 3.3915    | -9.4739          | -4.0876          | 3.2989           |
| 1.33      | -10.892      | -4.2173   | 3.5308    | -9.9135          | -4.2597          | 3.4602           |
| 1.85      | -12.5335     | -5.4633   | 4.5663    | -12.4826         | -5.2474          | 4.4131           |
| 2.44      | -14.78       | -6.1948   | 5.4055    | -14.9292         | -6.1642          | 5.3346           |
| 3.0       | -16.9922     | -7.1966   | 6.2631    | -16.9188         | -6.8958          | 6.0928           |
| 3.58      | -18.4969     | -6.7909   | 6.2034    | -18.7238         | -7.5504          | 6.7867           |

Table S6. Input data for calculations for ETYFUM all data (0.1 MPa-3.58 GPa pressure range).

| $p$ (GPa) | $\sigma p$ (GPa) | $a$ (Å) | $b$ (Å) | $c$ (Å) | $\alpha$ (°) | $\beta$ (°) | $\gamma$ (°) |
|-----------|------------------|---------|---------|---------|--------------|-------------|--------------|
| 0.0001    | 1.0              | 16.6937 | 4.8165  | 19.6871 | 90.0         | 109.083     | 90.0         |
| 0.08      | 3.0              | 16.68   | 4.7884  | 19.65   | 90.0         | 109.1       | 90.0         |
| 0.15      | 3.0              | 16.72   | 4.7728  | 19.7    | 90.0         | 110.1       | 90.0         |
| 0.29      | 3.0              | 16.7    | 4.702   | 19.65   | 90.0         | 110.1       | 90.0         |
| 0.35      | 2.0              | 16.686  | 4.6593  | 19.75   | 90.0         | 110.45      | 90.0         |
| 0.53      | 3.0              | 16.73   | 4.5924  | 19.74   | 90.0         | 110.9       | 90.0         |
| 0.79      | 2.0              | 16.758  | 4.5205  | 19.83   | 90.0         | 111.8       | 90.0         |
| 0.88      | 3.0              | 16.72   | 4.4815  | 19.84   | 90.0         | 111.79      | 90.0         |
| 1.25      | 2.0              | 16.758  | 4.3755  | 19.955  | 90.0         | 113.05      | 90.0         |
| 1.33      | 3.0              | 16.79   | 4.3174  | 19.94   | 90.0         | 113.2       | 90.0         |
| 1.85      | 2.0              | 16.808  | 4.246   | 20.027  | 90.0         | 114.38      | 90.0         |
| 2.44      | 2.0              | 16.836  | 4.1496  | 20.12   | 90.0         | 115.18      | 90.0         |
| 3.0       | 2.0              | 16.874  | 4.056   | 20.17   | 90.0         | 116.14      | 90.0         |
| 3.58      | 3.0              | 16.89   | 3.993   | 20.19   | 90.0         | 115.9       | 90.0         |

### 3. Details on Negative Linear Compressibility (NLC) in selected materials

3.1. Lists of NLC materials selected from literature and found in CSD

Table S7. Reported and calculated NLC values for selected NLC materials.

| Crystal<br>(REFCODE) | Median compressibility |                         |
|----------------------|------------------------|-------------------------|
|                      | Reported               | Calculated in this work |

|                                                                                                 | $K$ (TPa <sup>-1</sup> )      | $\Delta p$ (GPa)       | ref | $K$ (TPa <sup>-1</sup> ) | $\Delta p$ (GPa) |
|-------------------------------------------------------------------------------------------------|-------------------------------|------------------------|-----|--------------------------|------------------|
| ETYFYM                                                                                          |                               |                        |     | -24.36(98)               | 0.0001-3.58      |
| Ag <sub>3</sub> [Co(CN) <sub>6</sub> ] Phase I                                                  | -76(9)                        | 0.0001-0.157           | 24  | -72                      | 0.0001-0.15      |
| Ag <sub>3</sub> [Co(CN) <sub>6</sub> ] Phase II                                                 | -5.3(3)                       | 0.19-7.65              | 24  | -11.91(64)               | 0.19-7.65        |
| [Ag(en)]NO <sub>3</sub> -I (MAGVOG)                                                             | -28.4(18)                     | 0.0001-0.92            | 25  | -28.3(22)                | 0.0001-0.92      |
| Lithium L-tartrate<br>(UNIRUF)                                                                  | -16(2)                        | 2.01-5.52              | 26  | -15.4(15)                | 2.01-5.52        |
| BTCP-ditFB<br>(LUKWAS/LUKWOG)                                                                   | -30                           | 0.0001-0.7             | 27  | -4.5(15)                 | 0.0001-2.5       |
| (C <sub>6</sub> F <sub>5</sub> Au) <sub>2</sub> ( $\mu$ -1,4-<br>diisocyanobenzene)<br>(JOHGIX) | -12.6(25)                     | 0.0001-2.42            | 28  | -18.8(24)                | 0.0001-4.39      |
| Zn[Au(CN) <sub>2</sub> ] <sub>2</sub> Phase I                                                   | -42(5)                        | 0.35-1.78              | 29  | -37.1(42)                | 0.35-1.78        |
| Zn[Au(CN) <sub>2</sub> ] <sub>2</sub> Phase II                                                  | -6(3)                         | 2.04-14.22             | 29  | -4.5(10)                 | 2.04-14.22       |
| SULBAC                                                                                          | Not<br>reported               | 0.91-2.83              | 30  | -5.9(11)                 | 0.91-2.83        |
| BIUREA I                                                                                        | -2.7(5)                       | 0.0001-0.5             | 31  | -5(30)                   | 0.0001-0.5       |
| BIUREA II <sup>c</sup>                                                                          | -0.856(2)                     | 0.62-3.89              | 31  | -4.6(5)                  | 0.62-2.81        |
| POWSID                                                                                          | -41                           | 0.0001-0.48            | 32  | -16.4(35)                | 0.0001-2.48      |
| QAXMEH                                                                                          | -5.5(8)                       | 0.54-2.84              | 33  | -5.4(15)                 | 0.54-2.84        |
| CPOS-1                                                                                          | ~ -20 <sup>a</sup><br>(-90.7) | 1.02-2.32<br>(At 2.32) | 34  | -22.7                    | 1.02-2.32        |
| WATER@CPOS-1 <sup>b</sup>                                                                       | -13.3                         | 0.58-2.53              | 34  | -8.0                     | 0.58-2.53        |
| InH(BDC) <sub>2</sub>                                                                           | -62.4                         | 0-0.53                 | 19  |                          |                  |
| MIL-53(Al) I                                                                                    | -7.7                          | 0-1.8                  | 20  |                          |                  |

<sup>a</sup> value not listed, value read from the Graph in Figure 2 of the original paper [ref]

<sup>b</sup> The pressure range used for calculation in original work yielded highly biased values (very high ESD for all values), probably due to the same length of the unit-cell parameter  $c$  (i.e. direction exhibiting NLC) for the last two pressure points; therefore for calculations in this work the data point at 1.96 GPa was omitted from calculations (omitting the last point i.e. at 2.53 GPa led to software crash and principal axes could not be calculated)

<sup>c</sup> The tendency in the pressure-dependence of the length of parameter  $c$  (lying close to the principal axis exhibiting NLC) changed above 2.81, therefore data points above that pressure were omitted (including them led to function yielding biased values of compressibility)

Table S8. List of RFCODE families for crystal structures deposited in CSD, where NLC or NAC was observed found by datamining. Crystals were divided based on the type of the crystal: organic, organic-inorganic salts, metal complexes, coordination polymers (including MOFs- refcodes in bold font). The crystal system is denoted by the first letter of the appropriate system: m-monoclinic, o-orthorhombic, t-tetragonal, hexagonal.

| Refcode                                       | Crystal system | Ref. | Additional information                                                 | Formula                                                                                                                                                                 | Compound name                                                                                                                                                                                                            |
|-----------------------------------------------|----------------|------|------------------------------------------------------------------------|-------------------------------------------------------------------------------------------------------------------------------------------------------------------------|--------------------------------------------------------------------------------------------------------------------------------------------------------------------------------------------------------------------------|
| <b>ORGANIC</b>                                |                |      |                                                                        |                                                                                                                                                                         |                                                                                                                                                                                                                          |
| BIUREA                                        | m              | 31   | NLC in Phase I and II                                                  | C <sub>2</sub> D <sub>6</sub> N <sub>4</sub> O <sub>2</sub>                                                                                                             | perdeuterohydrazine-1,2-dicarboxamide                                                                                                                                                                                    |
| EGEWEV                                        | o              | 35   | NLC <sup>a</sup>                                                       | C <sub>7</sub> H <sub>5</sub> NO <sub>x</sub> (He)                                                                                                                      | 4-hydroxybenzotrile helium                                                                                                                                                                                               |
| KOWYEA                                        | o              | 36   | NAC in β polymorph                                                     | C <sub>8</sub> H <sub>8</sub> N <sub>2</sub>                                                                                                                            | 2-methyl-1H-benzimidazole                                                                                                                                                                                                |
| LOCCAI                                        | m              | 37   | NLC in H1 polymorph                                                    | C <sub>12</sub> H <sub>17</sub> N <sub>2</sub> S <sup>+</sup> .Cl <sup>-</sup> .H <sub>2</sub> O                                                                        | 2-((2,6-dimethylphenyl)amino)-5,6-dihydro-4H-1,3-thiazin-3-ium chloride monohydrate                                                                                                                                      |
| QAXMEH                                        | m              | 33   | NLC in yellow polymorph                                                | C <sub>12</sub> H <sub>9</sub> N <sub>3</sub> O <sub>2</sub> S                                                                                                          | 5-Methyl-2-((2-nitrophenyl)amino)-3-thiophenecarbonitrile                                                                                                                                                                |
| VOFVAN                                        | m              | 38   | NLC above 1GPa                                                         | C <sub>13</sub> H <sub>11</sub> NO                                                                                                                                      | 4-Aminobenzophenone                                                                                                                                                                                                      |
| YIHHON                                        | o              | 39   | NLC above 2.5 GPa                                                      | C <sub>3</sub> H <sub>7</sub> NO <sub>2</sub>                                                                                                                           | 2-(Methylamino)acetic acid                                                                                                                                                                                               |
| <b>ORGANIC-INORGANIC SALTS</b>                |                |      |                                                                        |                                                                                                                                                                         |                                                                                                                                                                                                                          |
| IZIYOI                                        | m              | 40   | NLC in high-pressure phase                                             | C <sub>6</sub> H <sub>13</sub> N <sub>2</sub> <sup>+</sup> .H <sub>2</sub> NO <sub>3</sub> S <sup>-</sup> .H <sub>2</sub> O                                             | 1,4-diazabicyclo[2.2.2]octan-1-ium sulfamate monohydrate                                                                                                                                                                 |
| OTELEH                                        | m              | 41   | NLC                                                                    | C <sub>2</sub> H <sub>6</sub> NO <sub>2</sub> <sup>+</sup> .H <sub>2</sub> O <sub>3</sub> P <sup>-</sup>                                                                | glycinium hydrogen phosphite                                                                                                                                                                                             |
| <b>METAL COMPLEXES</b>                        |                |      |                                                                        |                                                                                                                                                                         |                                                                                                                                                                                                                          |
| JOHGIX                                        | m              | 28   | NLC                                                                    | C <sub>20</sub> H <sub>4</sub> Au <sub>2</sub> F <sub>10</sub> N <sub>2</sub>                                                                                           | (μ <sub>2</sub> -1,4-Di-isocyanobenzene)-bis(pentafluorophenyl)-di-gold                                                                                                                                                  |
| POWSID                                        | m              | 32   | NLC                                                                    | C <sub>38</sub> H <sub>20</sub> FeN <sub>10</sub> S <sub>2</sub> C <sub>5</sub> H <sub>5</sub> N                                                                        | bis(Dipyrido(3,2-a:2',3'-c)phenazine)-di-isothiocyanato-iron(ii) pyridine solvate                                                                                                                                        |
| SULBAC                                        | t              | 30   | NLC                                                                    | C <sub>56</sub> H <sub>84</sub> O <sub>4</sub> Th                                                                                                                       | tetrakis(2,6-di-t-butylphenolato)-thorium(iv)                                                                                                                                                                            |
| <b>COORDINATION POLYMERS (including MOFs)</b> |                |      |                                                                        |                                                                                                                                                                         |                                                                                                                                                                                                                          |
| CEGFEA                                        | m              | 42   | NLC in phase I and II                                                  | (C <sub>8</sub> H <sub>10</sub> Ag <sub>2</sub> N <sub>4</sub> ) <sub>n</sub>                                                                                           | catena-((μ <sub>2</sub> -2-Methylimidazole-N,N')-silver(i))                                                                                                                                                              |
| FUVDEH <sup>b</sup>                           | t              | 43   | NAC                                                                    | (C <sub>18</sub> H <sub>12</sub> N <sub>2</sub> O <sub>3</sub> Zn) <sub>n</sub> .n(H <sub>2</sub> O)                                                                    | catena-[(μ <sub>2</sub> -4-(1H-Naphtho[2,3-d]imidazol-1-yl)benzoato)-(μ <sub>2</sub> -hydroxo)-zinc(ii) monohydrate]                                                                                                     |
| IFEPUG <sup>b</sup>                           | t              | 43   | NAC                                                                    | (C <sub>18</sub> H <sub>12</sub> N <sub>2</sub> O <sub>3</sub> Zn) <sub>n</sub> .n(CH <sub>4</sub> O)                                                                   | catena-[(μ <sub>2</sub> -Hydroxo)-(μ <sub>2</sub> -4-(1H-naphtho[2,3-d]imidazol-1-yl)benzoato)-zinc methanol solvate]                                                                                                    |
| JEXWOZ                                        | m              | 44   | NLC in AMnF-II                                                         | (C <sub>3</sub> H <sub>3</sub> MnO <sub>6</sub> <sup>-</sup> ) <sub>n</sub> .n(H <sub>4</sub> N <sup>+</sup> )                                                          | catena-(ammonium tris(μ <sub>2</sub> -formato)-manganese(ii))                                                                                                                                                            |
| JEXXAM                                        | h              | 45   | NLC                                                                    | (C <sub>3</sub> H <sub>3</sub> NiO <sub>6</sub> <sup>-</sup> ) <sub>n</sub> .H <sub>4</sub> N <sup>+</sup>                                                              | catena-[ammonium tris(μ-formato)-nickel]                                                                                                                                                                                 |
| MAGVOG                                        | m              | 25   | NLC in Phase I                                                         | (C <sub>2</sub> H <sub>8</sub> AgN <sub>2</sub> <sup>+</sup> ) <sub>n</sub> .n(NO <sub>3</sub> <sup>-</sup> )                                                           | [Ag(en)]NO <sub>3</sub> -I (catena-((m2-Ethylene-1,2-diamine-N,N')-silver(i) nitrate))                                                                                                                                   |
| NEVSUF                                        | t              | 46   | NLC                                                                    | (C <sub>46</sub> H <sub>42</sub> O <sub>16</sub> Zr <sub>3</sub> ) <sub>n</sub>                                                                                         | catena-[tetrakis(μ-hydroxo)-(μ-3,3',5,5'-tetrakis(4-carboxylatophenyl)-2,2',4,4',6,6'-hexamethyl-1,1'-biphenyl)-tetrakis(hydroxy)-tri-zirconium unknown solvate]                                                         |
| NEVTIU                                        | t              | 46   | NLC                                                                    | (C <sub>46</sub> H <sub>42</sub> Hf <sub>3</sub> O <sub>16</sub> ) <sub>n</sub>                                                                                         | catena-[tetrakis(μ-hydroxo)-(μ-3,3',5,5'-tetrakis(4-carboxylatophenyl)-2,2',4,4',6,6'-hexamethyl-1,1'-biphenyl)-tetrakis(hydroxy)-tri-hafnium(iv) unknown solvate]                                                       |
| OVUFAP                                        | m              | 47   | NLC of β-AMU3-DMF compressed in methanol:ethanol:water                 | (C <sub>18</sub> H <sub>12</sub> CdN <sub>4</sub> O <sub>4</sub> ) <sub>n</sub> .C <sub>3</sub> H <sub>7</sub> NO                                                       | catena-[(μ-terephthalato)-(μ-4,4'-diazenediyl)dipyridine)-cadmium(ii) N,N-dimethylformamide solvate]                                                                                                                     |
| UNIRUF                                        | m              | 26   | NLC in phase II                                                        | (C <sub>8</sub> H <sub>8</sub> Li <sub>4</sub> O <sub>12</sub> ) <sub>n</sub>                                                                                           | catena-[bis(μ-dihydrogen-L-tartrato)-tetra-lithium]                                                                                                                                                                      |
| YOLKOB                                        | o              | 48   | NLC when non-penetrating medium is used (glicerol and daphne oil 7474) | (C <sub>39</sub> H <sub>24</sub> F <sub>6</sub> N <sub>2</sub> O <sub>4</sub> S <sub>2</sub> Zn) <sub>n</sub> .2n(C <sub>3</sub> H <sub>7</sub> NO).n(H <sub>2</sub> O) | catena-[(μ <sub>2</sub> -4,4'-((3,3,4,4,5,5-hexafluorocyclopent-1-ene-1,2-diyl)bis(5-methylthiophene-4,2-diyl))dipyridine)-(μ <sub>2</sub> -biphenyl-4,4'-dicarboxylato)-zinc N,N-dimethylformamide solvate monohydrate] |

### 3.2. Principal axis strain calculation for selected NLC materials

Table S9. Principal axis strain calculation details for CPOS-1.<sup>34</sup>

| Input data                                                                                                                                                                                                                                                                                                                                                                                                                                                                                                                                                                                                                                                                                                                                                                                                                                                                                                                                                                                                                                                                                                                                                                                                                                                                                          |                            |                                 |                            |                                   |                                   |                                   |                |          |         |
|-----------------------------------------------------------------------------------------------------------------------------------------------------------------------------------------------------------------------------------------------------------------------------------------------------------------------------------------------------------------------------------------------------------------------------------------------------------------------------------------------------------------------------------------------------------------------------------------------------------------------------------------------------------------------------------------------------------------------------------------------------------------------------------------------------------------------------------------------------------------------------------------------------------------------------------------------------------------------------------------------------------------------------------------------------------------------------------------------------------------------------------------------------------------------------------------------------------------------------------------------------------------------------------------------------|----------------------------|---------------------------------|----------------------------|-----------------------------------|-----------------------------------|-----------------------------------|----------------|----------|---------|
| $p$ (GPa)                                                                                                                                                                                                                                                                                                                                                                                                                                                                                                                                                                                                                                                                                                                                                                                                                                                                                                                                                                                                                                                                                                                                                                                                                                                                                           | $\sigma p$ (GPa)           | $a$ (Å)                         | $b$ (Å)                    | $c$ (Å)                           | $\alpha$ (°)                      | $\theta$ (°)                      | $\gamma$ (°)   |          |         |
| 1.02                                                                                                                                                                                                                                                                                                                                                                                                                                                                                                                                                                                                                                                                                                                                                                                                                                                                                                                                                                                                                                                                                                                                                                                                                                                                                                | 1.0                        | 23.48                           | 23.48                      | 7.1                               | 90.0                              | 90.0                              | 90.0           |          |         |
| 1.4                                                                                                                                                                                                                                                                                                                                                                                                                                                                                                                                                                                                                                                                                                                                                                                                                                                                                                                                                                                                                                                                                                                                                                                                                                                                                                 | 1.0                        | 23.37                           | 23.37                      | 7.12                              | 90.0                              | 90.0                              | 90.0           |          |         |
| 1.82                                                                                                                                                                                                                                                                                                                                                                                                                                                                                                                                                                                                                                                                                                                                                                                                                                                                                                                                                                                                                                                                                                                                                                                                                                                                                                | 1.0                        | 23.2                            | 23.2                       | 7.24                              | 90.0                              | 90.0                              | 90.0           |          |         |
| 2.32                                                                                                                                                                                                                                                                                                                                                                                                                                                                                                                                                                                                                                                                                                                                                                                                                                                                                                                                                                                                                                                                                                                                                                                                                                                                                                | 1.0                        | 22.81                           | 22.81                      | 7.49                              | 90.0                              | 90.0                              | 90.0           |          |         |
| Principal axis strain calculation output                                                                                                                                                                                                                                                                                                                                                                                                                                                                                                                                                                                                                                                                                                                                                                                                                                                                                                                                                                                                                                                                                                                                                                                                                                                            |                            |                                 |                            |                                   |                                   |                                   |                |          |         |
|                                                                                                                                                                                                                                                                                                                                                                                                                                                                                                                                                                                                                                                                                                                                                                                                                                                                                                                                                                                                                                                                                                                                                                                                                                                                                                     |                            |                                 | Direction                  |                                   |                                   | Empirical parameters              |                |          |         |
| Axes                                                                                                                                                                                                                                                                                                                                                                                                                                                                                                                                                                                                                                                                                                                                                                                                                                                                                                                                                                                                                                                                                                                                                                                                                                                                                                | $K$ (TPa <sup>-1</sup> )   | $\sigma K$ (TPa <sup>-1</sup> ) | $a$                        | $b$                               | $c$                               | $\epsilon_0$                      | $\lambda$      | $\rho_c$ | $\nu$   |
| X <sub>1</sub>                                                                                                                                                                                                                                                                                                                                                                                                                                                                                                                                                                                                                                                                                                                                                                                                                                                                                                                                                                                                                                                                                                                                                                                                                                                                                      | 14.0516                    | nan                             | 1.0                        | 0.0                               | -0.0                              | 0.0065                            | -0.0           | -63.5481 | 83.8857 |
| X <sub>2</sub>                                                                                                                                                                                                                                                                                                                                                                                                                                                                                                                                                                                                                                                                                                                                                                                                                                                                                                                                                                                                                                                                                                                                                                                                                                                                                      | 14.0516                    | nan                             | 0.0                        | 1.0                               | 0.0                               | 0.0065                            | -0.0           | -63.5481 | 83.8857 |
| X <sub>3</sub>                                                                                                                                                                                                                                                                                                                                                                                                                                                                                                                                                                                                                                                                                                                                                                                                                                                                                                                                                                                                                                                                                                                                                                                                                                                                                      | -22.6971                   | nan                             | -0.0                       | -0.0                              | 1.0                               | -0.0005                           | 0.0312         | 1.02     | 2.0913  |
| V                                                                                                                                                                                                                                                                                                                                                                                                                                                                                                                                                                                                                                                                                                                                                                                                                                                                                                                                                                                                                                                                                                                                                                                                                                                                                                   | 2.3821                     | 1.9441                          |                            |                                   |                                   |                                   |                |          |         |
| Birch-Murnaghan coefficients                                                                                                                                                                                                                                                                                                                                                                                                                                                                                                                                                                                                                                                                                                                                                                                                                                                                                                                                                                                                                                                                                                                                                                                                                                                                        |                            |                                 |                            |                                   |                                   |                                   |                |          |         |
|                                                                                                                                                                                                                                                                                                                                                                                                                                                                                                                                                                                                                                                                                                                                                                                                                                                                                                                                                                                                                                                                                                                                                                                                                                                                                                     | $B_0$ (GPa)                | $\sigma B_0$ (GPa)              | $V_0$ (Å <sup>3</sup> )    | $\sigma V_0$ (Å <sup>3</sup> )    | $B'$                              | $\sigma B'$                       | $\rho_c$ (GPa) |          |         |
| 2nd                                                                                                                                                                                                                                                                                                                                                                                                                                                                                                                                                                                                                                                                                                                                                                                                                                                                                                                                                                                                                                                                                                                                                                                                                                                                                                 | 90.4371                    | 125.6994                        | 3968.0243                  | 94.2254                           | 4.0                               | n/a                               | 0.0            |          |         |
| 3rd                                                                                                                                                                                                                                                                                                                                                                                                                                                                                                                                                                                                                                                                                                                                                                                                                                                                                                                                                                                                                                                                                                                                                                                                                                                                                                 | 835.0298                   | 237.3798                        | 3919.8593                  | 3.1092                            | -194.0821                         | 35.0304                           | 0.0            |          |         |
| 3rd with $P_c$                                                                                                                                                                                                                                                                                                                                                                                                                                                                                                                                                                                                                                                                                                                                                                                                                                                                                                                                                                                                                                                                                                                                                                                                                                                                                      | 604.2267                   | 205.0766                        | 3914.3087                  | 2.2661                            | -270.9185                         | 40.017                            | 1.02           |          |         |
| Compressibility                                                                                                                                                                                                                                                                                                                                                                                                                                                                                                                                                                                                                                                                                                                                                                                                                                                                                                                                                                                                                                                                                                                                                                                                                                                                                     |                            |                                 |                            |                                   |                                   |                                   |                |          |         |
| $p$ (GPa)                                                                                                                                                                                                                                                                                                                                                                                                                                                                                                                                                                                                                                                                                                                                                                                                                                                                                                                                                                                                                                                                                                                                                                                                                                                                                           | $K_1$ (TPa <sup>-1</sup> ) | $K_2$ (TPa <sup>-1</sup> )      | $K_3$ (TPa <sup>-1</sup> ) | $\sigma K_1$ (TPa <sup>-1</sup> ) | $\sigma K_2$ (TPa <sup>-1</sup> ) | $\sigma K_3$ (TPa <sup>-1</sup> ) |                |          |         |
| 1.02                                                                                                                                                                                                                                                                                                                                                                                                                                                                                                                                                                                                                                                                                                                                                                                                                                                                                                                                                                                                                                                                                                                                                                                                                                                                                                | 8.6397                     | 8.6397                          | -0.0                       | nan                               | nan                               | nan                               |                |          |         |
| 1.4                                                                                                                                                                                                                                                                                                                                                                                                                                                                                                                                                                                                                                                                                                                                                                                                                                                                                                                                                                                                                                                                                                                                                                                                                                                                                                 | 14.0516                    | 14.0516                         | -22.6971                   | nan                               | nan                               | nan                               |                |          |         |
| 1.82                                                                                                                                                                                                                                                                                                                                                                                                                                                                                                                                                                                                                                                                                                                                                                                                                                                                                                                                                                                                                                                                                                                                                                                                                                                                                                | 23.9749                    | 23.9749                         | -51.1449                   | nan                               | nan                               | nan                               |                |          |         |
| 2.32                                                                                                                                                                                                                                                                                                                                                                                                                                                                                                                                                                                                                                                                                                                                                                                                                                                                                                                                                                                                                                                                                                                                                                                                                                                                                                | 45.0868                    | 45.0868                         | -86.8783                   | nan                               | nan                               | nan                               |                |          |         |
| Comments                                                                                                                                                                                                                                                                                                                                                                                                                                                                                                                                                                                                                                                                                                                                                                                                                                                                                                                                                                                                                                                                                                                                                                                                                                                                                            |                            |                                 |                            |                                   |                                   |                                   |                |          |         |
| An unusual behaviour of unit-cell volume of dry CPOS-1 can be noticed between 1.4 and 2.3 GPa, where a slight increase and then stabilization of its value is observed, an occurrence not addressed by the authors of original report. Noteworthy, provided crystal structures were simulated with Density Functional Theory calculations rather than solved based on experimental data. This, alongside the lack of the ESDs on the reported volume values and no access to experimental data that would enable revision of the reported structures, make it hard to explain this very unusual behaviour. There are examples in the literature where porous crystals increased their volume at high pressure, but it was due to the adsorption of the molecules of pressure transmitting medium (PTM). <sup>49</sup> In case of the CPOS-1 silicon oil was used as PTM, which is considered non-penetrating medium, but it is not unheard of for fragments of the framework destroyed by pressure to be forced in the pores, expanding the crystal structure. <sup>50</sup> It is also possible for the PTM to be contaminated with compounds of smaller molecules, such as water. <sup>27</sup> In such case the composition of the crystal changes, and it is hard to consider expansion as NLC. |                            |                                 |                            |                                   |                                   |                                   |                |          |         |



Table S10. Principal axis strain calculation details for water@CPOS-1.<sup>34</sup>

| Input data                               |                            |                                 |                            |                                   |                                   |                                   |              |          |         |
|------------------------------------------|----------------------------|---------------------------------|----------------------------|-----------------------------------|-----------------------------------|-----------------------------------|--------------|----------|---------|
| $p$ (GPa)                                | $\sigma p$ (GPa)           | $a$ (Å)                         | $b$ (Å)                    | $c$ (Å)                           | $\alpha$ (°)                      | $\theta$ (°)                      | $\gamma$ (°) |          |         |
| 0.58                                     | 1.0                        | 23.83                           | 23.83                      | 7.12                              | 90.0                              | 90.0                              | 90.0         |          |         |
| 0.98                                     | 1.0                        | 23.68                           | 23.68                      | 7.13                              | 90.0                              | 90.0                              | 90.0         |          |         |
| 1.32                                     | 1.0                        | 23.57                           | 23.57                      | 7.16                              | 90.0                              | 90.0                              | 90.0         |          |         |
| 2.53                                     | 1.0                        | 22.02                           | 22.02                      | 7.27                              | 90.0                              | 90.0                              | 90.0         |          |         |
| Principal axis strain calculation output |                            |                                 |                            |                                   |                                   |                                   |              |          |         |
|                                          |                            |                                 | Direction                  |                                   |                                   | Empirical parameters              |              |          |         |
| Axes                                     | $K$ (TPa <sup>-1</sup> )   | $\sigma K$ (TPa <sup>-1</sup> ) | $a$                        | $b$                               | $c$                               | $\epsilon_0$                      | $\lambda$    | $p_c$    | $\nu$   |
| $X_1$                                    | 14.882                     | nan                             | 1.0                        | 0.0                               | -0.0                              | 0.0061                            | -0.0         | -62.8572 | 84.0623 |
| $X_2$                                    | 14.882                     | nan                             | -0.0                       | 1.0                               | -0.0                              | 0.0061                            | -0.0         | -62.8572 | 84.0623 |
| $X_3$                                    | -8.0039                    | nan                             | 0.0                        | 0.0                               | 1.0                               | -0.0002                           | 0.0083       | 0.58     | 1.4066  |
| V                                        | 68.8689                    | 6.9251                          |                            |                                   |                                   |                                   |              |          |         |
| Birch-Murnaghan coefficients             |                            |                                 |                            |                                   |                                   |                                   |              |          |         |
|                                          | $B_0$ (GPa)                | $\sigma B_0$ (GPa)              | $V_0$ (Å <sup>3</sup> )    | $\sigma V_0$ (Å <sup>3</sup> )    | $B'$                              | $\sigma B'$                       | $p_c$ (GPa)  |          |         |
| 2nd                                      | 6.3487                     | 2.3015                          | 4508.5645                  | 214.4516                          | 4.0                               | n/a                               | 0.0          |          |         |
| 3rd                                      | 49.3978                    | 8.5151                          | 4090.7561                  | 15.518                            | -5.5174                           | 0.7153                            | 0.0          |          |         |
| 3rd with $P_c$                           | 45.8784                    | 8.1177                          | 4041.288                   | 7.7744                            | -6.6775                           | 0.6811                            | 0.58         |          |         |
| Compressibility                          |                            |                                 |                            |                                   |                                   |                                   |              |          |         |
| $p$ (GPa)                                | $K_1$ (TPa <sup>-1</sup> ) | $K_2$ (TPa <sup>-1</sup> )      | $K_3$ (TPa <sup>-1</sup> ) | $\sigma K_1$ (TPa <sup>-1</sup> ) | $\sigma K_2$ (TPa <sup>-1</sup> ) | $\sigma K_3$ (TPa <sup>-1</sup> ) |              |          |         |
| 0.58                                     | 8.8291                     | 8.8291                          | -0.0                       | Nan                               | nan                               | nan                               |              |          |         |
| 0.98                                     | 14.882                     | 14.882                          | -8.0039                    | Nan                               | nan                               | nan                               |              |          |         |
| 1.32                                     | 23.1356                    | 23.1356                         | -10.2784                   | Nan                               | nan                               | nan                               |              |          |         |
| 2.53                                     | 109.1642                   | 109.1642                        | -15.2409                   | Nan                               | nan                               | nan                               |              |          |         |

Table S11. Principal axis strain calculation details for BIUREA I.<sup>31</sup>

| Input data                               |                            |                                 |                            |                                   |                                   |                                   |                |          |        |
|------------------------------------------|----------------------------|---------------------------------|----------------------------|-----------------------------------|-----------------------------------|-----------------------------------|----------------|----------|--------|
| $p$ (GPa)                                | $\sigma p$ (GPa)           | $a$ (Å)                         | $b$ (Å)                    | $c$ (Å)                           | $\alpha$ (°)                      | $\beta$ (°)                       | $\gamma$ (°)   |          |        |
| 0.0001                                   | 1.0                        | 9.3308                          | 4.6415                     | 11.4721                           | 90.0                              | 82.069                            | 90.0           |          |        |
| 0.02                                     | 1.0                        | 9.337                           | 4.6053                     | 11.4184                           | 90.0                              | 82.134                            | 90.0           |          |        |
| 0.026                                    | 1.0                        | 9.338                           | 4.5938                     | 11.4034                           | 90.0                              | 82.154                            | 90.0           |          |        |
| 0.36                                     | 1.0                        | 9.3394                          | 4.5765                     | 11.3816                           | 90.0                              | 82.16                             | 90.0           |          |        |
| 0.5                                      | 1.0                        | 9.3429                          | 4.555                      | 11.3567                           | 90.0                              | 82.183                            | 90.0           |          |        |
| Principal axis strain calculation output |                            |                                 |                            |                                   |                                   |                                   |                |          |        |
|                                          |                            |                                 | Direction                  |                                   |                                   | Empirical parameters              |                |          |        |
| Axes                                     | $K$ (TPa <sup>-1</sup> )   | $\sigma K$ (TPa <sup>-1</sup> ) | $a$                        | $b$                               | $c$                               | $\epsilon_0$                      | $\lambda$      | $\rho_c$ | $\nu$  |
| $X_1$                                    | 75.9714                    | 271.8308                        | 0.0                        | 1.0                               | -0.0                              | 0.0002                            | -0.0202        | 0.0001   | 0.2112 |
| $X_2$                                    | 39.1429                    | 134.9569                        | 0.0484                     | 0.0                               | 0.9988                            | 0.0002                            | -0.0108        | 0.0001   | 0.1823 |
| $X_3$                                    | -5.28                      | 28.1664                         | 0.9899                     | 0.0                               | -0.142                            | -0.0001                           | 0.0017         | 0.0001   | 0.1362 |
| V                                        | 37.2064                    | 8.4055                          |                            |                                   |                                   |                                   |                |          |        |
| Birch-Murnaghan coefficients             |                            |                                 |                            |                                   |                                   |                                   |                |          |        |
|                                          | $B_0$ (GPa)                | $\sigma B_0$ (GPa)              | $V_0$ (Å <sup>3</sup> )    | $\sigma V_0$ (Å <sup>3</sup> )    | $B'$                              | $\sigma B'$                       | $\rho_c$ (GPa) |          |        |
| 2 <sup>nd</sup>                          | 18.9238                    | 6.6524                          | 489.232                    | 2.2319                            | 4.0                               | n/a                               | 0.0            |          |        |
| 3 <sup>rd</sup>                          | 11.0577                    | 12.2762                         | 487.3255                   | 2.5978                            | 190.9448                          | 203.8862                          | 0.0            |          |        |
| Compressibility                          |                            |                                 |                            |                                   |                                   |                                   |                |          |        |
| $p$ (GPa)                                | $K_1$ (TPa <sup>-1</sup> ) | $K_2$ (TPa <sup>-1</sup> )      | $K_3$ (TPa <sup>-1</sup> ) | $\sigma K_1$ (TPa <sup>-1</sup> ) | $\sigma K_2$ (TPa <sup>-1</sup> ) | $\sigma K_3$ (TPa <sup>-1</sup> ) |                |          |        |
| 0.0001                                   | 454*10 <sup>6</sup>        | 334*10 <sup>6</sup>             | -18*10 <sup>6</sup>        | 33*10 <sup>12</sup>               | 15*10 <sup>12</sup>               | 156*10 <sup>9</sup>               |                |          |        |
| 0.02                                     | 93.5252                    | 48.5555                         | -6.6297                    | 392.8542                          | 196.9653                          | 41.7619                           |                |          |        |
| 0.026                                    | 75.9714                    | 39.1429                         | -5.28                      | 271.8308                          | 134.9569                          | 28.1664                           |                |          |        |
| 0.36                                     | 9.5305                     | 4.5509                          | -0.5438                    | 25.8439                           | 12.298                            | 2.3988                            |                |          |        |
| 0.5                                      | 7.3544                     | 3.4786                          | -0.4094                    | 25.6359                           | 12.0346                           | 2.2978                            |                |          |        |

Table S12. Principal axis strain calculation details for BIUREA II.<sup>31</sup>

| Input data                               |                            |                                 |                            |                                   |                                   |                                   |              |        |        |
|------------------------------------------|----------------------------|---------------------------------|----------------------------|-----------------------------------|-----------------------------------|-----------------------------------|--------------|--------|--------|
| $p$ (GPa)                                | $\sigma p$ (GPa)           | $a$ (Å)                         | $b$ (Å)                    | $c$ (Å)                           | $\alpha$ (°)                      | $\beta$ (°)                       | $\gamma$ (°) |        |        |
| 0.62                                     | 1                          | 9.4872                          | 3.81402                    | 12.8589                           | 90.0                              | 77.936                            | 90.0         |        |        |
| 0.9                                      | 1                          | 9.485                           | 3.70468                    | 12.9889                           | 90.0                              | 77.632                            | 90.0         |        |        |
| 1.31                                     | 1                          | 9.4768                          | 3.61125                    | 13.0677                           | 90.0                              | 77.463                            | 90.0         |        |        |
| 1.63                                     | 1                          | 9.4644                          | 3.5503                     | 13.1017                           | 90.0                              | 77.388                            | 90.0         |        |        |
| 1.87                                     | 1                          | 9.4568                          | 3.51779                    | 13.1178                           | 90.0                              | 77.346                            | 90.0         |        |        |
| 2.02                                     | 1                          | 9.4526                          | 3.49778                    | 13.1229                           | 90.0                              | 77.341                            | 90.0         |        |        |
| 2.25                                     | 1                          | 9.4444                          | 3.46902                    | 13.1315                           | 90.0                              | 77.318                            | 90.0         |        |        |
| 2.53                                     | 1                          | 9.4344                          | 3.44007                    | 13.1345                           | 90.0                              | 77.317                            | 90.0         |        |        |
| 2.81                                     | 1                          | 9.4251                          | 3.41438                    | 13.1382                           | 90.0                              | 77.309                            | 90.0         |        |        |
| Principal axis strain calculation output |                            |                                 |                            |                                   |                                   |                                   |              |        |        |
|                                          |                            |                                 | Direction                  |                                   |                                   | Empirical parameters              |              |        |        |
| Axes                                     | $K$ (TPa <sup>-1</sup> )   | $\sigma K$ (TPa <sup>-1</sup> ) | $a$                        | $b$                               | $c$                               | $\epsilon_0$                      | $\lambda$    | $p_c$  | $\nu$  |
| $X_1$                                    | 38.2921                    | 0.3944                          | 0.0                        | 1.0                               | -0.0                              | 0.1962                            | -0.251       | 0.2976 | 0.2174 |
| $X_2$                                    | 3.9343                     | 0.0721                          | 0.9748                     | 0.0                               | -0.2229                           | 0.0001                            | -0.0047      | 0.6097 | 0.8679 |
| $X_3$                                    | -4.6498                    | 0.4562                          | 0.1447                     | -0.0                              | 0.9895                            | -35.6587                          | 35.6765      | 0.5685 | 0.0002 |
| V                                        | 41.9047                    | 2.764                           |                            |                                   |                                   |                                   |              |        |        |
| Birch-Murnaghan coefficients             |                            |                                 |                            |                                   |                                   |                                   |              |        |        |
|                                          | $B_0$ (GPa)                | $\sigma B_0$ (GPa)              | $V_0$ (Å <sup>3</sup> )    | $\sigma V_0$ (Å <sup>3</sup> )    | $B'$                              | $\sigma B'$                       | $p_c$ (GPa)  |        |        |
| 2 <sup>nd</sup>                          | 16.3976                    | 0.7431                          | 468.8453                   | 1.7321                            | 4.0                               | n/a                               | 0.0          |        |        |
| 3 <sup>rd</sup>                          | 0.0541                     | 112.807                         | 507.0226                   | 702.0038                          | 1495.1378                         | 3100231.2846                      | 0.0          |        |        |
| 3rd with $P_c$                           | 12.7127                    | 0.4962                          | 454.9202                   | 0.358                             | 12.7071                           | 0.8918                            | 0.62         |        |        |
| Compressibility                          |                            |                                 |                            |                                   |                                   |                                   |              |        |        |
| $p$ (GPa)                                | $K_1$ (TPa <sup>-1</sup> ) | $K_2$ (TPa <sup>-1</sup> )      | $K_3$ (TPa <sup>-1</sup> ) | $\sigma K_1$ (TPa <sup>-1</sup> ) | $\sigma K_2$ (TPa <sup>-1</sup> ) | $\sigma K_3$ (TPa <sup>-1</sup> ) |              |        |        |
| 0.62                                     | 132.3306                   | 7.4259                          | -117.3541                  | 8.804                             | 12.3115                           | 83.4761                           |              |        |        |
| 0.9                                      | 81.1335                    | 4.7764                          | -18.2496                   | 1.0188                            | 0.2933                            | 3.4628                            |              |        |        |
| 1.31                                     | 54.0445                    | 4.2519                          | -8.1605                    | 0.8198                            | 0.1392                            | 1.0576                            |              |        |        |
| 1.63                                     | 43.5914                    | 4.0456                          | -5.7008                    | 0.4621                            | 0.0753                            | 0.5672                            |              |        |        |
| 1.87                                     | 38.2921                    | 3.9343                          | -4.6498                    | 0.3944                            | 0.0721                            | 0.4562                            |              |        |        |
| 2.02                                     | 35.6567                    | 3.8763                          | -4.1694                    | 0.4471                            | 0.0844                            | 0.4356                            |              |        |        |
| 2.25                                     | 32.3251                    | 3.7997                          | -3.5992                    | 0.5781                            | 0.1099                            | 0.4327                            |              |        |        |
| 2.53                                     | 29.1065                    | 3.7214                          | -3.0855                    | 0.7391                            | 0.1414                            | 0.4426                            |              |        |        |
| 2.81                                     | 26.5356                    | 3.6551                          | -2.7001                    | 0.8759                            | 0.1703                            | 0.4521                            |              |        |        |

Table S13. Principal axis strain calculation details for QAXMEH. <sup>33</sup>

| Input data                               |                            |                                 |                            |                                   |                                   |                                   |              |         |        |
|------------------------------------------|----------------------------|---------------------------------|----------------------------|-----------------------------------|-----------------------------------|-----------------------------------|--------------|---------|--------|
| $p$ (GPa)                                | $\sigma p$ (GPa)           | $a$ (Å)                         | $b$ (Å)                    | $c$ (Å)                           | $\alpha$ (°)                      | $\theta$ (°)                      | $\gamma$ (°) |         |        |
| 0.54                                     | 1                          | 8.337                           | 15.8027                    | 8.4626                            | 90.0                              | 91.44                             | 90.0         |         |        |
| 0.99                                     | 1                          | 8.2031                          | 15.4235                    | 8.4569                            | 90.0                              | 90.851                            | 90.0         |         |        |
| 1.49                                     | 1                          | 8.116                           | 15.121                     | 8.4699                            | 90.0                              | 90.38                             | 90.0         |         |        |
| 1.89                                     | 1                          | 8.0755                          | 14.874                     | 8.4734                            | 90.0                              | 89.76                             | 90.0         |         |        |
| 2.84                                     | 1                          | 8.0025                          | 14.448                     | 8.4923                            | 90.0                              | 89.15                             | 90.0         |         |        |
| Principal axis strain calculation output |                            |                                 |                            |                                   |                                   |                                   |              |         |        |
|                                          |                            |                                 | Direction                  |                                   |                                   | Empirical parameters              |              |         |        |
| Axes                                     | $K$ (TPa <sup>-1</sup> )   | $\sigma K$ (TPa <sup>-1</sup> ) | $a$                        | $b$                               | $c$                               | $\epsilon_0$                      | $\lambda$    | $p_c$   | $\nu$  |
| X <sub>1</sub>                           | 38.7817                    | 2.2201                          | 0.0                        | 1.0                               | -0.0                              | 0.0782                            | -0.0975      | -0.1051 | 0.5018 |
| X <sub>2</sub>                           | 19.4573                    | 0.624                           | 0.9611                     | 0.0                               | -0.276                            | 49.4556                           | -49.4741     | 0.0179  | 0.0006 |
| X <sub>3</sub>                           | -5.3689                    | 1.5158                          | 0.304                      | 0.0                               | 0.9527                            | -0.0003                           | 0.0048       | 0.54    | 1.138  |
| V                                        | 50.2775                    | 5.3564                          |                            |                                   |                                   |                                   |              |         |        |
| Birch-Murnaghan coefficients             |                            |                                 |                            |                                   |                                   |                                   |              |         |        |
|                                          | $B_0$ (GPa)                | $\sigma B_0$ (GPa)              | $V_0$ (Å <sup>3</sup> )    | $\sigma V_0$ (Å <sup>3</sup> )    | $B'$                              | $\sigma B'$                       | $p_c$ (GPa)  |         |        |
| 2nd                                      | 12.5247                    | 1.2031                          | 1150.7838                  | 10.3148                           | 4.0                               | n/a                               | 0.0          |         |        |
| 3rd                                      | 0.0126                     | 576.9656                        | 1263.2294                  | 14753.7505                        | 3899.8433                         | 177534163.3117                    | 0.0          |         |        |
| 3rd with $P_c$                           | 8.7955                     | 0.6861                          | 1114.2898                  | 2.1374                            | 13.0842                           | 1.4655                            | 0.54         |         |        |
| Compressibility                          |                            |                                 |                            |                                   |                                   |                                   |              |         |        |
| $p$ (GPa)                                | $K_1$ (TPa <sup>-1</sup> ) | $K_2$ (TPa <sup>-1</sup> )      | $K_3$ (TPa <sup>-1</sup> ) | $\sigma K_1$ (TPa <sup>-1</sup> ) | $\sigma K_2$ (TPa <sup>-1</sup> ) | $\sigma K_3$ (TPa <sup>-1</sup> ) |              |         |        |
| 0.54                                     | 60.8826                    | 54.8297                         | -0.0339                    | 13.9939                           | 6.338                             | 40*10 <sup>12</sup>               |              |         |        |
| 0.99                                     | 46.7732                    | 29.4583                         | -4.8428                    | 2.3386                            | 1.0441                            | 3.3248                            |              |         |        |
| 1.49                                     | 38.7817                    | 19.4573                         | -5.3689                    | 2.2201                            | 0.624                             | 1.5158                            |              |         |        |
| 1.89                                     | 34.6908                    | 15.3021                         | -5.6357                    | 1.2206                            | 0.5081                            | 0.8538                            |              |         |        |
| 2.84                                     | 28.5728                    | 10.1533                         | -6.0658                    | 3.229                             | 0.9028                            | 2.387                             |              |         |        |

Table S14. Principal axis strain calculation details for IZIYOI hp.<sup>40</sup>

| Input data                               |                          |                                 |           |         |              |                      |              |        |        |
|------------------------------------------|--------------------------|---------------------------------|-----------|---------|--------------|----------------------|--------------|--------|--------|
| $p$ (GPa)                                | $\sigma p$ (GPa)         | $a$ (Å)                         | $b$ (Å)   | $c$ (Å) | $\alpha$ (°) | $\beta$ (°)          | $\gamma$ (°) |        |        |
| 1.36                                     | 1                        | 5.2002                          | 14.798    | 12.423  | 90.0         | 96.112               | 90.0         |        |        |
| 1.51                                     | 1                        | 5.1961                          | 14.805    | 12.343  | 90.0         | 96.0                 | 90.0         |        |        |
| 1.65                                     | 1                        | 5.1914                          | 14.812    | 12.293  | 90.0         | 95.93                | 90.0         |        |        |
| 1.73                                     | 1                        | 5.1869                          | 14.839    | 12.236  | 90.0         | 95.73                | 90.0         |        |        |
| 1.8                                      | 1                        | 5.1893                          | 14.832    | 12.199  | 90.0         | 95.76                | 90.0         |        |        |
| 1.91                                     | 1                        | 5.1806                          | 14.841    | 12.152  | 90.0         | 95.59                | 90.0         |        |        |
| 1.99                                     | 1                        | 5.1721                          | 14.85     | 12.073  | 90.0         | 95.242               | 90.0         |        |        |
| 2.06                                     | 1                        | 5.1718                          | 14.904    | 12.041  | 90.0         | 95.14                | 90.0         |        |        |
| 2.16                                     | 1                        | 5.1626                          | 14.916    | 11.963  | 90.0         | 94.79                | 90.0         |        |        |
| 2.36                                     | 1                        | 5.1551                          | 14.95     | 11.879  | 90.0         | 94.201               | 90.0         |        |        |
| 2.39                                     | 1                        | 5.1535                          | 14.942    | 11.869  | 90.0         | 94.35                | 90.0         |        |        |
| Principal axis strain calculation output |                          |                                 |           |         |              |                      |              |        |        |
|                                          |                          |                                 | Direction |         |              | Empirical parameters |              |        |        |
| Axes                                     | $K$ (TPa <sup>-1</sup> ) | $\sigma K$ (TPa <sup>-1</sup> ) | $a$       | $b$     | $c$          | $\epsilon_0$         | $\lambda$    | $p_c$  | $\nu$  |
| $X_1$                                    | 52.1402                  | 1.8325                          | -0.404    | -0.0    | 0.9147       | -0.0                 | -0.0494      | 1.36   | 1.1629 |
| $X_2$                                    | 0.7752                   | 1.9348                          | 0.9929    | 0.0     | 0.1188       | 2.6275               | -2.6292      | 1.3425 | 0.0002 |
| $X_3$                                    | -11.2915                 | 1.6455                          | -0.0      | 1.0     | -0.0         | -0.0001              | 0.0101       | 1.36   | 1.5651 |
| V                                        | 40.6353                  | 0.7868                          |           |         |              |                      |              |        |        |

Table S14. Principal axis strain calculation details for IZIOI hp.<sup>40</sup> -*continuation*

| Birch-Murnaghan coefficients |                            |                            |                            |                                   |                                   |                                   |             |
|------------------------------|----------------------------|----------------------------|----------------------------|-----------------------------------|-----------------------------------|-----------------------------------|-------------|
|                              | $B_0$ (GPa)                | $\sigma B_0$ (GPa)         | $V_0$ (Å <sup>3</sup> )    | $\sigma V_0$ (Å <sup>3</sup> )    | $B'$                              | $\sigma B'$                       | $p_c$ (GPa) |
| 2nd                          | 16.6013                    | 0.77                       | 1021.6624                  | 3.8216                            | 4.0                               | n/a                               | 0.0         |
| 3rd                          | 21.831                     | 8.8713                     | 1009.829                   | 17.3511                           | 1.4355                            | 3.8919                            | 0.0         |
| 3rd with $P_c$               | 23.4368                    | 2.9822                     | 951.0629                   | 1.2425                            | 0.9148                            | 4.9818                            | 1.36        |
| Compressibility              |                            |                            |                            |                                   |                                   |                                   |             |
| $p$ (GPa)                    | $K_1$ (TPa <sup>-1</sup> ) | $K_2$ (TPa <sup>-1</sup> ) | $K_3$ (TPa <sup>-1</sup> ) | $\sigma K_1$ (TPa <sup>-1</sup> ) | $\sigma K_2$ (TPa <sup>-1</sup> ) | $\sigma K_3$ (TPa <sup>-1</sup> ) |             |
| 1.36                         | 1.1611                     | 25.092                     | -0.0                       | 447796520.0008                    | 233.0249                          | 9444309.5287                      |             |
| 1.51                         | 42.1938                    | 2.6257                     | -5.4187                    | 6.9021                            | 5.9519                            | 2.4897                            |             |
| 1.65                         | 46.9775                    | 1.4305                     | -7.8647                    | 4.6939                            | 1.3173                            | 2.7166                            |             |
| 1.73                         | 48.8794                    | 1.1352                     | -9.0254                    | 3.5419                            | 1.3203                            | 2.5454                            |             |
| 1.8                          | 50.2788                    | 0.9616                     | -9.9538                    | 2.6877                            | 1.609                             | 2.239                             |             |
| 1.91                         | 52.1402                    | 0.7752                     | -11.2915                   | 1.8325                            | 1.9348                            | 1.6455                            |             |
| 1.99                         | 53.3065                    | 0.6795                     | -12.1922                   | 1.8102                            | 2.0686                            | 1.3403                            |             |
| 2.06                         | 54.2294                    | 0.6132                     | -12.9401                   | 2.1692                            | 2.1381                            | 1.3859                            |             |
| 2.16                         | 55.422                     | 0.5382                     | -13.9543                   | 2.9538                            | 2.1873                            | 2.0067                            |             |
| 2.36                         | 57.4737                    | 0.4324                     | -15.8296                   | 4.6976                            | 2.1887                            | 4.0715                            |             |
| 2.39                         | 57.7511                    | 0.42                       | -16.0962                   | 4.9548                            | 2.1826                            | 4.4191                            |             |
| 1.36                         | 1.1611                     | 25.092                     | -0.0                       | 447796520.0008                    | 233.0249                          | 9444309.5287                      |             |

Table S15. Principal axis strain calculation details for SULBAC. <sup>30</sup>

| Input data                               |                            |                                 |                            |                                   |                                   |                                   |              |         |        |
|------------------------------------------|----------------------------|---------------------------------|----------------------------|-----------------------------------|-----------------------------------|-----------------------------------|--------------|---------|--------|
| $p$ (GPa)                                | $\sigma p$ (GPa)           | $a$ (Å)                         | $b$ (Å)                    | $c$ (Å)                           | $\alpha$ (°)                      | $\theta$ (°)                      | $\gamma$ (°) |         |        |
| 0.91                                     | 1                          | 13.4289                         | 13.4289                    | 13.551                            | 90.0                              | 90.0                              | 90.0         |         |        |
| 1.37                                     | 1                          | 13.2089                         | 13.2089                    | 13.5581                           | 90.0                              | 90.0                              | 90.0         |         |        |
| 1.77                                     | 1                          | 13.0469                         | 13.0469                    | 13.5793                           | 90.0                              | 90.0                              | 90.0         |         |        |
| 2.04                                     | 1                          | 12.9516                         | 12.9516                    | 13.5965                           | 90.0                              | 90.0                              | 90.0         |         |        |
| 2.41                                     | 1                          | 12.7987                         | 12.7987                    | 13.6509                           | 90.0                              | 90.0                              | 90.0         |         |        |
| 2.44                                     | 1                          | 12.8099                         | 12.8099                    | 13.6621                           | 90.0                              | 90.0                              | 90.0         |         |        |
| 2.62                                     | 1                          | 12.7617                         | 12.7617                    | 13.6588                           | 90.0                              | 90.0                              | 90.0         |         |        |
| 2.83                                     | 1                          | 12.6948                         | 12.6948                    | 13.6644                           | 90.0                              | 90.0                              | 90.0         |         |        |
| Principal axis strain calculation output |                            |                                 |                            |                                   |                                   |                                   |              |         |        |
|                                          |                            |                                 | Direction                  |                                   |                                   | Empirical parameters              |              |         |        |
| Axes                                     | $K$ (TPa <sup>-1</sup> )   | $\sigma K$ (TPa <sup>-1</sup> ) | $a$                        | $b$                               | $c$                               | $\epsilon_0$                      | $\lambda$    | $p_c$   | $\nu$  |
| X <sub>1</sub>                           | 27.4329                    | 1.0929                          | 1.0                        | 0.0                               | -0.0                              | 21.3118                           | -21.2111     | -1.7402 | 0.0049 |
| X <sub>2</sub>                           | 27.4329                    | 1.1628                          | 0.0                        | 1.0                               | -0.0                              | 21.3112                           | -21.2105     | -1.7402 | 0.0049 |
| X <sub>3</sub>                           | -5.8586                    | 1.0728                          | -0.0                       | 0.0                               | 1.0                               | -0.0004                           | 0.0038       | 0.91    | 1.4513 |
| V                                        | 50.4396                    | 2.7105                          |                            |                                   |                                   |                                   |              |         |        |
| Birch-Murnaghan coefficients             |                            |                                 |                            |                                   |                                   |                                   |              |         |        |
|                                          | $B_0$ (GPa)                | $\sigma B_0$ (GPa)              | $V_0$ (Å <sup>3</sup> )    | $\sigma V_0$ (Å <sup>3</sup> )    | $B'$                              | $\sigma B'$                       | $p_c$ (GPa)  |         |        |
| 2 <sup>nd</sup>                          | 11.9026                    | 0.4783                          | 2605.0118                  | 11.3594                           | 4.0                               | n/a                               | 0.0          |         |        |
| 3 <sup>rd</sup>                          | 4.8001                     | 4.5193                          | 2724.1058                  | 120.1665                          | 11.1313                           | 8.7787                            | 0.0          |         |        |
| 3rd with P <sub>c</sub>                  | 12.6794                    | 1.3138                          | 2443.3952                  | 5.9512                            | 7.4621                            | 1.9106                            | 0.91         |         |        |
| Compressibility                          |                            |                                 |                            |                                   |                                   |                                   |              |         |        |
| $p$ (GPa)                                | $K_1$ (TPa <sup>-1</sup> ) | $K_2$ (TPa <sup>-1</sup> )      | $K_3$ (TPa <sup>-1</sup> ) | $\sigma K_1$ (TPa <sup>-1</sup> ) | $\sigma K_2$ (TPa <sup>-1</sup> ) | $\sigma K_3$ (TPa <sup>-1</sup> ) |              |         |        |
| 0.91                                     | 39.0624                    | 39.0622                         | -0.0                       | 5.9379                            | 6.5249                            | 1627083954.7939                   |              |         |        |
| 1.37                                     | 33.3109                    | 33.3109                         | -3.9051                    | 1.2894                            | 1.3561                            | 2.6836                            |              |         |        |
| 1.77                                     | 29.5323                    | 29.5323                         | -5.1793                    | 1.5166                            | 1.6909                            | 1.8083                            |              |         |        |
| 2.04                                     | 27.4329                    | 27.4329                         | -5.8586                    | 1.0929                            | 1.1628                            | 1.0728                            |              |         |        |
| 2.41                                     | 24.9985                    | 24.9985                         | -6.6575                    | 1.2628                            | 1.3338                            | 1.6657                            |              |         |        |
| 2.44                                     | 24.8199                    | 24.82                           | -6.7173                    | 1.3626                            | 1.454                             | 1.7829                            |              |         |        |
| 2.62                                     | 23.8002                    | 23.8003                         | -7.0631                    | 2.09                              | 2.3139                            | 2.5518                            |              |         |        |
| 2.83                                     | 22.7118                    | 22.7118                         | -7.4422                    | 3.0794                            | 3.4623                            | 3.5196                            |              |         |        |

Table S16. Principal axis strain calculation details for POWSID.<sup>32</sup>

| Input data                               |                            |                                 |                            |                                   |                                   |                                   |              |           |         |
|------------------------------------------|----------------------------|---------------------------------|----------------------------|-----------------------------------|-----------------------------------|-----------------------------------|--------------|-----------|---------|
| $p$ (GPa)                                | $\sigma p$ (GPa)           | $a$ (Å)                         | $b$ (Å)                    | $c$ (Å)                           | $\alpha$ (°)                      | $\beta$ (°)                       | $\gamma$ (°) |           |         |
| 0.0001                                   | 1                          | 13.3756                         | 8.6951                     | 16.3247                           | 90.0                              | 104.261                           | 90.0         |           |         |
| 0.2                                      | 1                          | 13.44                           | 8.548                      | 16.2728                           | 90.0                              | 103.8                             | 90.0         |           |         |
| 0.3                                      | 1                          | 13.511                          | 8.349                      | 16.23                             | 90.0                              | 103.663                           | 90.0         |           |         |
| 0.48                                     | 1                          | 13.585                          | 8.236                      | 16.306                            | 90.0                              | 103.3                             | 90.0         |           |         |
| 0.85                                     | 1                          | 13.59                           | 8.07                       | 16.21                             | 90.0                              | 103.33                            | 90.0         |           |         |
| 1.82                                     | 1                          | 13.614                          | 7.741                      | 16.059                            | 90.0                              | 102.55                            | 90.0         |           |         |
| 2.48                                     | 1                          | 13.562                          | 7.541                      | 15.878                            | 90.0                              | 101.57                            | 90.0         |           |         |
| Principal axis strain calculation output |                            |                                 |                            |                                   |                                   |                                   |              |           |         |
|                                          |                            |                                 | Direction                  |                                   |                                   | Empirical parameters              |              |           |         |
| Axes                                     | $K$ (TPa <sup>-1</sup> )   | $\sigma K$ (TPa <sup>-1</sup> ) | $a$                        | $b$                               | $c$                               | $\epsilon_0$                      | $\lambda$    | $p_c$     | $\nu$   |
| $X_1$                                    | 77.6169                    | 12.336                          | 0.0                        | 1.0                               | -0.0                              | 0.2243                            | -0.2906      | -0.2995   | 0.2199  |
| $X_2$                                    | 6.7262                     | 0.3145                          | -0.3518                    | -0.0                              | 0.9361                            | 0.005                             | -0.0         | -107.8934 | 74.6563 |
| $X_3$                                    | -16.4071                   | 3.5153                          | 0.9213                     | 0.0                               | 0.3889                            | -47.0636                          | 47.0859      | -0.0872   | 0.0002  |
| V                                        | 52.2003                    | 2.0625                          |                            |                                   |                                   |                                   |              |           |         |
| Birch-Murnaghan coefficients             |                            |                                 |                            |                                   |                                   |                                   |              |           |         |
|                                          | $B_0$ (GPa)                | $\sigma B_0$ (GPa)              | $V_0$ (Å <sup>3</sup> )    | $\sigma V_0$ (Å <sup>3</sup> )    | $B'$                              | $\sigma B'$                       | $p_c$ (GPa)  |           |         |
| 2nd                                      | 13.262                     | 0.6301                          | 1834.9542                  | 6.3165                            | 4.0                               | n/a                               | 0.0          |           |         |
| 3rd                                      | 13.0267                    | 2.5573                          | 1835.5423                  | 9.5155                            | 4.2254                            | 2.3825                            | 0.0          |           |         |
| Compressibility                          |                            |                                 |                            |                                   |                                   |                                   |              |           |         |
| $p$ (GPa)                                | $K_1$ (TPa <sup>-1</sup> ) | $K_2$ (TPa <sup>-1</sup> )      | $K_3$ (TPa <sup>-1</sup> ) | $\sigma K_1$ (TPa <sup>-1</sup> ) | $\sigma K_2$ (TPa <sup>-1</sup> ) | $\sigma K_3$ (TPa <sup>-1</sup> ) |              |           |         |
| 0.0001                                   | 163.6414                   | 4.8507                          | -106.5924                  | 90.1611                           | 0.2268                            | 107.2128                          |              |           |         |
| 0.2                                      | 109.8316                   | 5.5593                          | -32.4002                   | 14.331                            | 0.2599                            | 9.1837                            |              |           |         |
| 0.3                                      | 95.2587                    | 5.9511                          | -24.0331                   | 13.3055                           | 0.2782                            | 6.5576                            |              |           |         |
| 0.48                                     | 77.6169                    | 6.7262                          | -16.4071                   | 12.336                            | 0.3145                            | 3.5153                            |              |           |         |
| 0.85                                     | 57.3276                    | 8.6457                          | -9.9304                    | 6.5367                            | 0.4042                            | 1.9627                            |              |           |         |
| 1.82                                     | 35.5696                    | 16.6293                         | -4.8804                    | 6.8447                            | 0.7775                            | 2.5094                            |              |           |         |
| 2.48                                     | 28.7897                    | 25.8661                         | -3.6259                    | 9.9656                            | 1.2093                            | 2.5173                            |              |           |         |



Table S17. Principal axis strain calculation details for JOHGIX ((C<sub>6</sub>F<sub>5</sub>Au)<sub>2</sub>(μ-1,4-diisocyanobenzene)).<sup>28</sup>

| Input data                               |                            |                                 |                            |                                   |                                   |                                   |              |         |        |
|------------------------------------------|----------------------------|---------------------------------|----------------------------|-----------------------------------|-----------------------------------|-----------------------------------|--------------|---------|--------|
| $p$ (GPa)                                | $\sigma p$ (GPa)           | $a$ (Å)                         | $b$ (Å)                    | $c$ (Å)                           | $\alpha$ (°)                      | $\beta$ (°)                       | $\gamma$ (°) |         |        |
| 0.0001                                   | 1                          | 5.458                           | 9.754                      | 18.838                            | 90.0                              | 91.632                            | 90.0         |         |        |
| 0.28                                     | 1                          | 5.5274                          | 9.4838                     | 18.41                             | 90.0                              | 92.32                             | 90.0         |         |        |
| 0.73                                     | 1                          | 5.5924                          | 9.2665                     | 17.985                            | 90.0                              | 92.91                             | 90.0         |         |        |
| 1.38                                     | 1                          | 5.6422                          | 9.0462                     | 17.618                            | 90.0                              | 93.39                             | 90.0         |         |        |
| 2.42                                     | 1                          | 5.6829                          | 8.7611                     | 17.176                            | 90.0                              | 94.06                             | 90.0         |         |        |
| Principal axis strain calculation output |                            |                                 |                            |                                   |                                   |                                   |              |         |        |
|                                          |                            |                                 | Direction                  |                                   |                                   | Empirical parameters              |              |         |        |
| Axes                                     | $K$ (TPa <sup>-1</sup> )   | $\sigma K$ (TPa <sup>-1</sup> ) | $a$                        | $b$                               | $c$                               | $\epsilon_0$                      | $\lambda$    | $p_c$   | $\nu$  |
| X <sub>1</sub>                           | 43.1152                    | 0.5159                          | 0.0                        | 1.0                               | 0.0                               | -0.0                              | -0.0619      | 0.0001  | 0.618  |
| X <sub>2</sub>                           | 41.8096                    | 1.4847                          | 0.5004                     | -0.0                              | 0.8658                            | 0.0588                            | -0.1107      | -0.1651 | 0.3516 |
| X <sub>3</sub>                           | -18.7636                   | 2.4261                          | 0.9992                     | 0.0                               | -0.0404                           | -64.0328                          | 64.0589      | -0.2353 | 0.0003 |
| V                                        | 58.3481                    | 5.6138                          |                            |                                   |                                   |                                   |              |         |        |
| Birch-Murnaghan coefficients             |                            |                                 |                            |                                   |                                   |                                   |              |         |        |
|                                          | $B_0$ (GPa)                | $\sigma B_0$ (GPa)              | $V_0$ (Å <sup>3</sup> )    | $\sigma V_0$ (Å <sup>3</sup> )    | $B'$                              | $\sigma B'$                       | $p_c$ (GPa)  |         |        |
| 2nd                                      | 11.5677                    | 0.8577                          | 991.5983                   | 6.1046                            | 4.0                               | n/a                               | 0.0          |         |        |
| 3rd                                      | 7.6442                     | 1.4803                          | 999.0525                   | 5.8583                            | 9.631                             | 2.6898                            | 0.0          |         |        |
| Compressibility                          |                            |                                 |                            |                                   |                                   |                                   |              |         |        |
| $p$ (GPa)                                | $K_1$ (TPa <sup>-1</sup> ) | $K_2$ (TPa <sup>-1</sup> )      | $K_3$ (TPa <sup>-1</sup> ) | $\sigma K_1$ (TPa <sup>-1</sup> ) | $\sigma K_2$ (TPa <sup>-1</sup> ) | $\sigma K_3$ (TPa <sup>-1</sup> ) |              |         |        |
| 0.0001                                   | 1489144800.3671            | 125.0652                        | -76.9085                   | 1.67*10 <sup>24</sup>             | 23.9058                           | 37.3112                           |              |         |        |
| 0.28                                     | 62.1816                    | 65.7691                         | -35.1427                   | 2.0985                            | 2.6017                            | 3.4775                            |              |         |        |
| 0.73                                     | 43.1152                    | 41.8096                         | -18.7636                   | 0.5159                            | 1.4847                            | 2.4261                            |              |         |        |
| 1.38                                     | 33.8035                    | 29.3454                         | -11.2148                   | 0.3377                            | 0.7358                            | 0.6155                            |              |         |        |
| 2.42                                     | 27.2747                    | 21.0184                         | -6.8233                    | 0.5925                            | 1.5078                            | 1.3118                            |              |         |        |

Table S18. Principal axis strain calculation details for MAGVOG I ([Ag(en)]NO<sub>3</sub>-I).<sup>25</sup>

| Input data                               |                            |                                 |                            |                                   |                                   |                                   |              |          |        |
|------------------------------------------|----------------------------|---------------------------------|----------------------------|-----------------------------------|-----------------------------------|-----------------------------------|--------------|----------|--------|
| $p$ (GPa)                                | $\sigma p$ (GPa)           | $a$ (Å)                         | $b$ (Å)                    | $c$ (Å)                           | $\alpha$ (°)                      | $\beta$ (°)                       | $\gamma$ (°) |          |        |
| 0.0001                                   | 2.0                        | 10.4305                         | 10.5272                    | 6.2956                            | 90.0                              | 115.16                            | 90.0         |          |        |
| 0.12                                     | 1.0                        | 10.451                          | 10.51                      | 6.268                             | 90.0                              | 115.08                            | 90.0         |          |        |
| 0.41                                     | 1.0                        | 10.521                          | 10.426                     | 6.202                             | 90.0                              | 115.0                             | 90.0         |          |        |
| 0.6                                      | 1.0                        | 10.574                          | 10.345                     | 6.166                             | 90.0                              | 114.85                            | 90.0         |          |        |
| 0.74                                     | 1.0                        | 10.596                          | 10.295                     | 6.141                             | 90.0                              | 114.67                            | 90.0         |          |        |
| 0.92                                     | 1.0                        | 10.632                          | 10.219                     | 6.115                             | 90.0                              | 114.46                            | 90.0         |          |        |
| Principal axis strain calculation output |                            |                                 |                            |                                   |                                   |                                   |              |          |        |
|                                          |                            |                                 | Direction                  |                                   |                                   | Empirical parameters              |              |          |        |
| Axes                                     | $K$ (TPa <sup>-1</sup> )   | $\sigma K$ (TPa <sup>-1</sup> ) | $a$                        | $b$                               | $c$                               | $\epsilon_0$                      | $\lambda$    | $p_c$    | $\nu$  |
| X <sub>1</sub>                           | 32.9122                    | 3.5933                          | 0.0983                     | 0.0                               | 0.9952                            | 26.0501                           | -26.0555     | -0.8651  | 0.0016 |
| X <sub>2</sub>                           | 33.5475                    | 1.2502                          | -0.0                       | 1.0                               | -0.0                              | 0.0004                            | -0.0337      | 0.0001   | 1.3066 |
| X <sub>3</sub>                           | -28.2978                   | 2.1506                          | 0.9066                     | 0.0                               | 0.422                             | -0.4871                           | 0.0877       | -11.8083 | 0.694  |
| V                                        | 37.2247                    | 0.4634                          |                            |                                   |                                   |                                   |              |          |        |
| Birch-Murnaghan coefficients             |                            |                                 |                            |                                   |                                   |                                   |              |          |        |
|                                          | $B_0$ (GPa)                | $\sigma B_0$ (GPa)              | $V_0$ (Å <sup>3</sup> )    | $\sigma V_0$ (Å <sup>3</sup> )    | $B'$                              | $\sigma B'$                       | $p_c$ (GPa)  |          |        |
| 2nd                                      | 24.3308                    | 0.371                           | 626.5322                   | 0.2193                            | 4.0                               | n/a                               | 0.0          |          |        |
| 3rd                                      | 26.038                     | 1.2732                          | 626.2721                   | 0.2567                            | 0.583                             | 2.3618                            | 0.0          |          |        |
| Compressibility                          |                            |                                 |                            |                                   |                                   |                                   |              |          |        |
| $p$ (GPa)                                | $K_1$ (TPa <sup>-1</sup> ) | $K_2$ (TPa <sup>-1</sup> )      | $K_3$ (TPa <sup>-1</sup> ) | $\sigma K_1$ (TPa <sup>-1</sup> ) | $\sigma K_2$ (TPa <sup>-1</sup> ) | $\sigma K_3$ (TPa <sup>-1</sup> ) |              |          |        |
| 0.0001                                   | 48.4739                    | 0.0001                          | -28.5948                   | 11.9061                           | 7402363345627.261                 | 9.3392                            |              |          |        |
| 0.12                                     | 42.5831                    | 23.0126                         | -28.5065                   | 2.1993                            | 2.7243                            | 4.6603                            |              |          |        |
| 0.41                                     | 32.9122                    | 33.5475                         | -28.2978                   | 3.5933                            | 1.2502                            | 2.1506                            |              |          |        |
| 0.6                                      | 28.6505                    | 37.7031                         | -28.1645                   | 0.8549                            | 1.1361                            | 2.0364                            |              |          |        |
| 0.74                                     | 26.1555                    | 40.2077                         | -28.068                    | 3.565                             | 1.8237                            | 1.8189                            |              |          |        |
| 0.92                                     | 23.5221                    | 42.9839                         | -27.946                    | 7.7735                            | 2.8903                            | 5.9064                            |              |          |        |

Table S19. Principal axis strain calculation details for UNIRUF II (lithium L-tartrate II).<sup>26</sup>

| Input data                               |                            |                                 |                            |                                   |                                   |                                   |              |       |        |
|------------------------------------------|----------------------------|---------------------------------|----------------------------|-----------------------------------|-----------------------------------|-----------------------------------|--------------|-------|--------|
| $p$ (GPa)                                | $\sigma p$ (GPa)           | $a$ (Å)                         | $b$ (Å)                    | $c$ (Å)                           | $\alpha$ (°)                      | $\beta$ (°)                       | $\gamma$ (°) |       |        |
| 2.01                                     | 1.0                        | 14.67                           | 4.946                      | 10.365                            | 90.0                              | 131.97                            | 90.0         |       |        |
| 2.29                                     | 1.0                        | 14.639                          | 4.9393                     | 10.379                            | 90.0                              | 132.027                           | 90.0         |       |        |
| 2.95                                     | 1.0                        | 14.477                          | 4.9154                     | 10.425                            | 90.0                              | 132.46                            | 90.0         |       |        |
| 3.43                                     | 1.0                        | 14.342                          | 4.8946                     | 10.487                            | 90.0                              | 133.01                            | 90.0         |       |        |
| 4.03                                     | 1.0                        | 14.231                          | 4.856                      | 10.642                            | 90.0                              | 134.235                           | 90.0         |       |        |
| 4.41                                     | 1.0                        | 14.168                          | 4.8351                     | 10.715                            | 90.0                              | 134.825                           | 90.0         |       |        |
| 4.66                                     | 1.0                        | 14.126                          | 4.8218                     | 10.753                            | 90.0                              | 135.162                           | 90.0         |       |        |
| 4.82                                     | 1.0                        | 14.095                          | 4.8107                     | 10.788                            | 90.0                              | 135.458                           | 90.0         |       |        |
| 5.52                                     | 1.0                        | 14.024                          | 4.789                      | 10.837                            | 90.0                              | 135.927                           | 90.0         |       |        |
| Principal axis strain calculation output |                            |                                 |                            |                                   |                                   |                                   |              |       |        |
|                                          |                            |                                 | Direction                  |                                   |                                   | Empirical parameters              |              |       |        |
| Axes                                     | $K$ (TPa <sup>-1</sup> )   | $\sigma K$ (TPa <sup>-1</sup> ) | $a$                        | $b$                               | $c$                               | $\epsilon_0$                      | $\lambda$    | $p_c$ | $\nu$  |
| X <sub>1</sub>                           | 35.7141                    | 2.4393                          | 0.7554                     | -0.0                              | 0.6552                            | 0.0036                            | -0.0326      | 2.01  | 1.0535 |
| X <sub>2</sub>                           | 10.3729                    | 0.5793                          | -0.0                       | 1.0                               | -0.0                              | 0.0006                            | -0.0084      | 2.01  | 1.1298 |
| X <sub>3</sub>                           | -15.3463                   | 1.4685                          | 0.0668                     | -0.0                              | 0.9978                            | -0.0015                           | 0.0119       | 2.01  | 1.157  |
| V                                        | 29.1418                    | 0.9977                          |                            |                                   |                                   |                                   |              |       |        |
| Birch-Murnaghan coefficients             |                            |                                 |                            |                                   |                                   |                                   |              |       |        |
|                                          | $B_0$ (GPa)                | $\sigma B_0$ (GPa)              | $V_0$ (Å <sup>3</sup> )    | $\sigma V_0$ (Å <sup>3</sup> )    | $B'$                              | $\sigma B'$                       | $p_c$ (GPa)  |       |        |
| 2nd                                      | 18.8557                    | 1.1036                          | 615.5756                   | 4.289                             | 4.0                               | n/a                               | 0.0          |       |        |
| 3rd                                      | 27.4966                    | 7.7217                          | 601.8454                   | 10.0491                           | 1.831                             | 1.6631                            | 0.0          |       |        |
| 3rd with $P_c$                           | 30.7033                    | 4.0963                          | 561.7441                   | 1.7144                            | 1.3565                            | 2.0553                            | 2.01         |       |        |
| Compressibility                          |                            |                                 |                            |                                   |                                   |                                   |              |       |        |
| $p$ (GPa)                                | $K_1$ (TPa <sup>-1</sup> ) | $K_2$ (TPa <sup>-1</sup> )      | $K_3$ (TPa <sup>-1</sup> ) | $\sigma K_1$ (TPa <sup>-1</sup> ) | $\sigma K_2$ (TPa <sup>-1</sup> ) | $\sigma K_3$ (TPa <sup>-1</sup> ) |              |       |        |
| 2.01                                     | 5.1924                     | 0.0963                          | -0.1024                    | 382*10 <sup>12</sup>              | 10*10 <sup>12</sup>               | 0.381*10 <sup>12</sup>            |              |       |        |
| 2.29                                     | 32.1321                    | 8.0261                          | -11.253                    | 10.1794                           | 2.0783                            | 4.9618                            |              |       |        |
| 2.95                                     | 34.2823                    | 9.3924                          | -13.6096                   | 4.4526                            | 1.1051                            | 2.8384                            |              |       |        |
| 3.43                                     | 35.0472                    | 9.909                           | -14.5202                   | 2.4536                            | 0.6354                            | 1.6622                            |              |       |        |
| 4.03                                     | 35.7141                    | 10.3729                         | -15.3463                   | 2.4393                            | 0.5793                            | 1.4685                            |              |       |        |
| 4.41                                     | 36.0449                    | 10.6076                         | -15.7672                   | 3.2611                            | 0.7843                            | 1.993                             |              |       |        |
| 4.66                                     | 36.2364                    | 10.7449                         | -16.0145                   | 3.8572                            | 0.9437                            | 2.4131                            |              |       |        |
| 4.82                                     | 36.3502                    | 10.8269                         | -16.1625                   | 4.2365                            | 1.0475                            | 2.689                             |              |       |        |
| 5.52                                     | 36.7853                    | 11.1441                         | -16.7369                   | 5.7949                            | 1.4869                            | 3.8705                            |              |       |        |

Table S20. Principal axis strain calculation details for Ag<sub>3</sub>[Co(CN)<sub>6</sub>] I.<sup>24</sup>

| Input data |                  |         |         |         |              |             |              |
|------------|------------------|---------|---------|---------|--------------|-------------|--------------|
| $p$ (GPa)  | $\sigma p$ (GPa) | $a$ (Å) | $b$ (Å) | $c$ (Å) | $\alpha$ (°) | $\beta$ (°) | $\gamma$ (°) |
| 0.0001     | 1                | 7.0309  | 7.0309  | 7.1172  | 90.0         | 90.0        | 90.0         |
| 0.06       | 1                | 6.9913  | 6.9913  | 7.14    | 90.0         | 90.0        | 90.0         |

|                                                                                                                                                                                                                                                                            |                                            |                                                 |                                            |                                                   |                                                   |                                                   |                               |                         |                         |
|----------------------------------------------------------------------------------------------------------------------------------------------------------------------------------------------------------------------------------------------------------------------------|--------------------------------------------|-------------------------------------------------|--------------------------------------------|---------------------------------------------------|---------------------------------------------------|---------------------------------------------------|-------------------------------|-------------------------|-------------------------|
| 0.157                                                                                                                                                                                                                                                                      | 1                                          | 6.9065                                          | 6.9065                                     | 7.2006                                            | 90.0                                              | 90.0                                              | 90.0                          |                         |                         |
| <b>Principal axis strain calculation output</b>                                                                                                                                                                                                                            |                                            |                                                 |                                            |                                                   |                                                   |                                                   |                               |                         |                         |
|                                                                                                                                                                                                                                                                            |                                            |                                                 | <b>Direction</b>                           |                                                   |                                                   | <b>Empirical parameters</b>                       |                               |                         |                         |
| <b>Axes</b>                                                                                                                                                                                                                                                                | <b><math>K</math> (TPa<sup>-1</sup>)</b>   | <b><math>\sigma K</math> (TPa<sup>-1</sup>)</b> | <b><math>a</math></b>                      | <b><math>b</math></b>                             | <b><math>c</math></b>                             | <b><math>\epsilon_0</math></b>                    | <b><math>\lambda</math></b>   | <b><math>p_c</math></b> | <b><math>\nu</math></b> |
| X <sub>1</sub>                                                                                                                                                                                                                                                             | 112.525                                    | nan                                             | 1.0                                        | 0.0                                               | -0.0                                              | 0.0                                               | -0.1639                       | -0.0003                 | 1.1982                  |
| X <sub>2</sub>                                                                                                                                                                                                                                                             | 112.525                                    | nan                                             | 0.0                                        | 1.0                                               | -0.0                                              | 0.0                                               | -0.1639                       | -0.0003                 | 1.1982                  |
| X <sub>3</sub>                                                                                                                                                                                                                                                             | -71.656                                    | nan                                             | -0.0                                       | -0.0                                              | 1.0                                               | -0.0                                              | 0.1401                        | 0.0                     | 1.3431                  |
| V                                                                                                                                                                                                                                                                          | 152.4697                                   | 2.9733                                          |                                            |                                                   |                                                   |                                                   |                               |                         |                         |
| <b>Birch-Murnaghan coefficients</b>                                                                                                                                                                                                                                        |                                            |                                                 |                                            |                                                   |                                                   |                                                   |                               |                         |                         |
|                                                                                                                                                                                                                                                                            | <b><math>B_0</math> (GPa)</b>              | <b><math>\sigma B_0</math> (GPa)</b>            | <b><math>V_0</math> (Å<sup>3</sup>)</b>    | <b><math>\sigma V_0</math> (Å<sup>3</sup>)</b>    | <b><math>B'</math></b>                            | <b><math>\sigma B'</math></b>                     | <b><math>p_c</math> (GPa)</b> |                         |                         |
| 2nd                                                                                                                                                                                                                                                                        | 6.124                                      | 0.4014                                          | 352.0508                                   | 0.3487                                            | 4.0                                               | n/a                                               | 0.0                           |                         |                         |
| 3rd                                                                                                                                                                                                                                                                        | 7.8138                                     | inf                                             | 351.833                                    | inf                                               | -12.8464                                          | inf                                               | 0.0                           |                         |                         |
| <b>Compressibility</b>                                                                                                                                                                                                                                                     |                                            |                                                 |                                            |                                                   |                                                   |                                                   |                               |                         |                         |
| <b><math>p</math> (GPa)</b>                                                                                                                                                                                                                                                | <b><math>K_1</math> (TPa<sup>-1</sup>)</b> | <b><math>K_2</math> (TPa<sup>-1</sup>)</b>      | <b><math>K_3</math> (TPa<sup>-1</sup>)</b> | <b><math>\sigma K_1</math> (TPa<sup>-1</sup>)</b> | <b><math>\sigma K_2</math> (TPa<sup>-1</sup>)</b> | <b><math>\sigma K_3</math> (TPa<sup>-1</sup>)</b> |                               |                         |                         |
| 0.0001                                                                                                                                                                                                                                                                     | 41.36                                      | 41.36                                           | -6.4507                                    | nan                                               | nan                                               | nan                                               |                               |                         |                         |
| 0.06                                                                                                                                                                                                                                                                       | 112.525                                    | 112.525                                         | -71.656                                    | nan                                               | nan                                               | nan                                               |                               |                         |                         |
| 0.157                                                                                                                                                                                                                                                                      | 136.0837                                   | 136.0837                                        | -99.6889                                   | nan                                               | nan                                               | nan                                               |                               |                         |                         |
| <b>Comments</b>                                                                                                                                                                                                                                                            |                                            |                                                 |                                            |                                                   |                                                   |                                                   |                               |                         |                         |
| At least as many data points as parameters are needed for a fit to be carried out (e.g. 3 for 3rd order Birch-Murnaghan, 4 for empirical pressure fitting). As PASCAL calculates errors from derivatives, more data points than parameters are needed for error estimates. |                                            |                                                 |                                            |                                                   |                                                   |                                                   |                               |                         |                         |

Table S21. Principal axis strain calculation details for Ag<sub>3</sub>[Co(CN)<sub>6</sub>] II.<sup>24</sup>

| Input data                               |                          |                                 |                         |                                |              |                      |                |          |        |
|------------------------------------------|--------------------------|---------------------------------|-------------------------|--------------------------------|--------------|----------------------|----------------|----------|--------|
| $p$ (GPa)                                | $\sigma p$ (GPa)         | $a$ (Å)                         | $b$ (Å)                 | $c$ (Å)                        | $\alpha$ (°) | $\theta$ (°)         | $\gamma$ (°)   |          |        |
| 0.19                                     | 1.0                      | 6.6985                          | 11.5782                 | 6.5554                         | 90.0         | 78.522               | 90.0           |          |        |
| 0.226                                    | 1.0                      | 6.6934                          | 11.5391                 | 6.5661                         | 90.0         | 78.521               | 90.0           |          |        |
| 0.29                                     | 2.0                      | 6.68                            | 11.468                  | 6.577                          | 90.0         | 78.47                | 90.0           |          |        |
| 0.294                                    | 1.0                      | 6.6745                          | 11.497                  | 6.5707                         | 90.0         | 78.473               | 90.0           |          |        |
| 0.395                                    | 1.0                      | 6.6415                          | 11.4251                 | 6.5959                         | 90.0         | 78.284               | 90.0           |          |        |
| 0.55                                     | 2.0                      | 6.605                           | 11.295                  | 6.629                          | 90.0         | 78.21                | 90.0           |          |        |
| 0.78                                     | 2.0                      | 6.553                           | 11.196                  | 6.646                          | 90.0         | 77.967               | 90.0           |          |        |
| 0.9                                      | 2.0                      | 6.539                           | 11.156                  | 6.654                          | 90.0         | 77.871               | 90.0           |          |        |
| 0.92                                     | 2.0                      | 6.5333                          | 11.154                  | 6.6507                         | 90.0         | 77.91                | 90.0           |          |        |
| 1.08                                     | 2.0                      | 6.505                           | 11.116                  | 6.663                          | 90.0         | 77.73                | 90.0           |          |        |
| 1.87                                     | 2.0                      | 6.4172                          | 10.922                  | 6.696                          | 90.0         | 77.584               | 90.0           |          |        |
| 3.02                                     | 2.0                      | 6.2904                          | 10.739                  | 6.747                          | 90.0         | 77.39                | 90.0           |          |        |
| 5.13                                     | 2.0                      | 6.0657                          | 10.493                  | 6.833                          | 90.0         | 77.09                | 90.0           |          |        |
| 6.92                                     | 2.0                      | 5.91                            | 10.333                  | 6.891                          | 90.0         | 77.01                | 90.0           |          |        |
| 7.65                                     | 2.0                      | 5.8657                          | 10.27                   | 6.908                          | 90.0         | 76.921               | 90.0           |          |        |
| Principal axis strain calculation output |                          |                                 |                         |                                |              |                      |                |          |        |
|                                          |                          |                                 | Direction               |                                |              | Empirical parameters |                |          |        |
| Axes                                     | $K$ (TPa <sup>-1</sup> ) | $\sigma K$ (TPa <sup>-1</sup> ) | $a$                     | $b$                            | $c$          | $\epsilon_0$         | $\lambda$      | $\rho_c$ | $\nu$  |
| X <sub>1</sub>                           | 31.7957                  | 1.008                           | 0.0                     | 1.0                            | 0.0          | 0.0782               | -0.1162        | -0.0215  | 0.2575 |
| X <sub>2</sub>                           | 27.49                    | 0.9349                          | 0.9718                  | 0.0                            | -0.236       | 0.0061               | -0.0376        | 0.1383   | 0.6671 |
| X <sub>3</sub>                           | -11.906                  | 0.6378                          | 0.0397                  | 0.0                            | 0.9992       | -0.004               | 0.0206         | 0.1561   | 0.4994 |
| V                                        | 25.2773                  | 1.4075                          |                         |                                |              |                      |                |          |        |
| Birch-Murnaghan coefficients             |                          |                                 |                         |                                |              |                      |                |          |        |
|                                          | $B_0$ (GPa)              | $\sigma B_0$ (GPa)              | $V_0$ (Å <sup>3</sup> ) | $\sigma V_0$ (Å <sup>3</sup> ) | $B'$         | $\sigma B'$          | $\rho_c$ (GPa) |          |        |
| 2nd                                      | 23.2904                  | 0.8843                          | 498.2556                | 1.5382                         | 4.0          | n/a                  | 0.0            |          |        |
| 3rd                                      | 10.741                   | 1.3371                          | 505.3077                | 1.6002                         | 13.2503      | 1.808                | 0.0            |          |        |
| 3rd with P <sub>c</sub>                  | 13.1187                  | 1.0592                          | 497.3116                | 0.8894                         | 11.8886      | 1.2382               | 0.19           |          |        |

Table S21. Principal axis strain calculation details for  $\text{Ag}_3[\text{Co}(\text{CN})_6]$  II. <sup>24</sup>- continuation

| <b>Compressibility</b>                                   |                                            |                                            |                                            |                                                   |                                                   |                                                   |
|----------------------------------------------------------|--------------------------------------------|--------------------------------------------|--------------------------------------------|---------------------------------------------------|---------------------------------------------------|---------------------------------------------------|
| <b><math>p</math> (GPa)</b>                              | <b><math>K_1</math> (TPa<sup>-1</sup>)</b> | <b><math>K_2</math> (TPa<sup>-1</sup>)</b> | <b><math>K_3</math> (TPa<sup>-1</sup>)</b> | <b><math>\sigma K_1</math> (TPa<sup>-1</sup>)</b> | <b><math>\sigma K_2</math> (TPa<sup>-1</sup>)</b> | <b><math>\sigma K_3</math> (TPa<sup>-1</sup>)</b> |
| 0.19                                                     | 94.8203                                    | 67.2893                                    | -55.8581                                   | 12.3528                                           | 25.1915                                           | 32.8753                                           |
| 0.226                                                    | 84.3772                                    | 56.4415                                    | -38.8899                                   | 7.9521                                            | 9.9985                                            | 7.9964                                            |
| 0.29                                                     | 71.1337                                    | 47.0339                                    | -28.0899                                   | 3.9257                                            | 3.4292                                            | 2.2128                                            |
| 0.294                                                    | 70.463                                     | 46.6283                                    | -27.6791                                   | 3.7678                                            | 3.2571                                            | 2.1208                                            |
| 0.395                                                    | 57.3346                                    | 39.481                                     | -21.0231                                   | 1.6294                                            | 1.5211                                            | 1.4045                                            |
| 0.55                                                     | 45.3323                                    | 33.7372                                    | -16.3678                                   | 1.2027                                            | 1.2457                                            | 1.0921                                            |
| 0.78                                                     | 35.2658                                    | 29.1042                                    | -13.002                                    | 1.103                                             | 1.0406                                            | 0.7612                                            |
| 0.9                                                      | 31.7957                                    | 27.49                                      | -11.906                                    | 1.008                                             | 0.9349                                            | 0.6378                                            |
| 0.92                                                     | 31.2928                                    | 27.2539                                    | -11.7489                                   | 0.9911                                            | 0.918                                             | 0.6198                                            |
| 1.08                                                     | 27.8507                                    | 25.616                                     | -10.6821                                   | 0.8551                                            | 0.7915                                            | 0.4967                                            |
| 1.87                                                     | 18.642                                     | 20.9148                                    | -7.84                                      | 0.3773                                            | 0.3819                                            | 0.2096                                            |
| 3.02                                                     | 13.1019                                    | 17.6537                                    | -6.0631                                    | 0.2327                                            | 0.2295                                            | 0.1899                                            |
| 5.13                                                     | 8.8598                                     | 14.7033                                    | -4.5992                                    | 0.3598                                            | 0.3988                                            | 0.2694                                            |
| 6.92                                                     | 7.1                                        | 13.2775                                    | -3.9433                                    | 0.4116                                            | 0.5099                                            | 0.3031                                            |
| 7.65                                                     | 6.592                                      | 12.8333                                    | -3.746                                     | 0.4227                                            | 0.5437                                            | 0.3117                                            |
| <b>Comments</b>                                          |                                            |                                            |                                            |                                                   |                                                   |                                                   |
| For input data $\sigma p=2$ set for neutron powder data. |                                            |                                            |                                            |                                                   |                                                   |                                                   |

Table S22. Principal axis strain calculation details for Zn[Au(CN)<sub>2</sub>]<sub>2</sub> I.<sup>29</sup>

| Input data                               |                          |                                 |                         |                                |              |                      |                |          |        |
|------------------------------------------|--------------------------|---------------------------------|-------------------------|--------------------------------|--------------|----------------------|----------------|----------|--------|
| $p$ (GPa)                                | $\sigma p$ (GPa)         | $a$ (Å)                         | $b$ (Å)                 | $c$ (Å)                        | $\alpha$ (°) | $\beta$ (°)          | $\gamma$ (°)   |          |        |
| 0.35                                     | 1.0                      | 8.2549                          | 8.2549                  | 21.1181                        | 90.0         | 90.0                 | 90.0           |          |        |
| 0.79                                     | 2.0                      | 8.0921                          | 8.0921                  | 21.438                         | 90.0         | 90.0                 | 90.0           |          |        |
| 0.95                                     | 1.0                      | 8.0278                          | 8.0278                  | 21.6073                        | 90.0         | 90.0                 | 90.0           |          |        |
| 1.02                                     | 2.0                      | 8.0051                          | 8.0051                  | 21.612                         | 90.0         | 90.0                 | 90.0           |          |        |
| 1.17                                     | 2.0                      | 7.949                           | 7.949                   | 21.7                           | 90.0         | 90.0                 | 90.0           |          |        |
| 1.3                                      | 1.0                      | 7.8537                          | 7.8537                  | 21.9417                        | 90.0         | 90.0                 | 90.0           |          |        |
| 1.36                                     | 2.0                      | 7.793                           | 7.793                   | 22.048                         | 90.0         | 90.0                 | 90.0           |          |        |
| 1.5                                      | 1.0                      | 7.8066                          | 7.8066                  | 22.0406                        | 90.0         | 90.0                 | 90.0           |          |        |
| 1.56                                     | 2.0                      | 7.7208                          | 7.7208                  | 22.147                         | 90.0         | 90.0                 | 90.0           |          |        |
| 1.78                                     | 1.0                      | 7.6743                          | 7.6743                  | 22.2592                        | 90.0         | 90.0                 | 90.0           |          |        |
| Principal axis strain calculation output |                          |                                 |                         |                                |              |                      |                |          |        |
|                                          |                          |                                 | Direction               |                                |              | Empirical parameters |                |          |        |
| Axes                                     | $K$ (TPa <sup>-1</sup> ) | $\sigma K$ (TPa <sup>-1</sup> ) | $a$                     | $b$                            | $c$          | $\epsilon_0$         | $\lambda$      | $\rho_c$ | $\nu$  |
| $X_1$                                    | 53.1254                  | 4.7515                          | 1.0                     | 0.0                            | -0.0         | 0.0003               | -0.0504        | 0.35     | 1.0687 |
| $X_2$                                    | 53.1254                  | 4.7515                          | 0.0                     | 1.0                            | -0.0         | 0.0003               | -0.0504        | 0.35     | 1.0687 |
| $X_3$                                    | -37.0697                 | 4.2737                          | -0.0                    | -0.0                           | 1.0          | -12.7036             | 12.0285        | -7.7778  | 0.026  |
| V                                        | 64.0214                  | 2.2508                          |                         |                                |              |                      |                |          |        |
| Birch-Murnaghan coefficients             |                          |                                 |                         |                                |              |                      |                |          |        |
|                                          | $B_0$ (GPa)              | $\sigma B_0$ (GPa)              | $V_0$ (Å <sup>3</sup> ) | $\sigma V_0$ (Å <sup>3</sup> ) | $B'$         | $\sigma B'$          | $\rho_c$ (GPa) |          |        |
| 2nd                                      | 10.6608                  | 0.8634                          | 1495.3125               | 10.0139                        | 4.0          | n/a                  | 0.0            |          |        |
| 3rd                                      | 18.2885                  | 2.1614                          | 1468.4336               | 6.2722                         | -1.5656      | 1.2311               | 0.0            |          |        |
| 3rd with $P_c$                           | 17.6345                  | 1.715                           | 1440.1221               | 3.5827                         | -2.1964      | 1.4451               | 0.35           |          |        |

Table S22. Principal axis strain calculation details for  $\text{Zn}[\text{Au}(\text{CN})_2]_2$  I.<sup>29</sup>- continuation

| <b>Compressibility</b>                                                                                                                                                                                            |                                            |                                            |                                            |                                                   |                                                   |                                                   |
|-------------------------------------------------------------------------------------------------------------------------------------------------------------------------------------------------------------------|--------------------------------------------|--------------------------------------------|--------------------------------------------|---------------------------------------------------|---------------------------------------------------|---------------------------------------------------|
| <b><math>p</math> (GPa)</b>                                                                                                                                                                                       | <b><math>K_1</math> (TPa<sup>-1</sup>)</b> | <b><math>K_2</math> (TPa<sup>-1</sup>)</b> | <b><math>K_3</math> (TPa<sup>-1</sup>)</b> | <b><math>\sigma K_1</math> (TPa<sup>-1</sup>)</b> | <b><math>\sigma K_2</math> (TPa<sup>-1</sup>)</b> | <b><math>\sigma K_3</math> (TPa<sup>-1</sup>)</b> |
| 0.35                                                                                                                                                                                                              | 4.1105                                     | 4.1105                                     | -40.7076                                   | 2.86*10 <sup>15</sup>                             | 2.86*10 <sup>15</sup>                             | 14.773                                            |
| 0.79                                                                                                                                                                                                              | 50.9001                                    | 50.9001                                    | -38.6701                                   | 16.0506                                           | 16.0506                                           | 3.2399                                            |
| 0.95                                                                                                                                                                                                              | 51.9968                                    | 51.9968                                    | -37.9795                                   | 10.3785                                           | 10.3785                                           | 4.425                                             |
| 1.02                                                                                                                                                                                                              | 52.3927                                    | 52.3927                                    | -37.6852                                   | 8.3                                               | 8.3                                               | 4.6268                                            |
| 1.17                                                                                                                                                                                                              | 53.1254                                    | 53.1254                                    | -37.0697                                   | 4.7515                                            | 4.7515                                            | 4.2737                                            |
| 1.3                                                                                                                                                                                                               | 53.6654                                    | 53.6654                                    | -36.5526                                   | 3.4508                                            | 3.4508                                            | 3.3753                                            |
| 1.36                                                                                                                                                                                                              | 53.8918                                    | 53.8918                                    | -36.3188                                   | 3.7184                                            | 3.7184                                            | 3.0259                                            |
| 1.5                                                                                                                                                                                                               | 54.3748                                    | 54.3748                                    | -35.7849                                   | 5.5891                                            | 5.5891                                            | 3.7155                                            |
| 1.56                                                                                                                                                                                                              | 54.5652                                    | 54.5652                                    | -35.561                                    | 6.5775                                            | 6.5775                                            | 4.7959                                            |
| 1.78                                                                                                                                                                                                              | 55.1954                                    | 55.1954                                    | -34.7635                                   | 10.2397                                           | 10.2397                                           | 10.9939                                           |
| <b>Comments</b>                                                                                                                                                                                                   |                                            |                                            |                                            |                                                   |                                                   |                                                   |
| For input data $\sigma p=2$ set for powder data.<br>The lower limit not equal 0.1 MPa does not mean the NLC is not present starting from ambient conditions, but the compressibility value lack a physical sense. |                                            |                                            |                                            |                                                   |                                                   |                                                   |
| <b>Compressibility reported in original paper <sup>29</sup></b>                                                                                                                                                   |                                            |                                            |                                            |                                                   |                                                   |                                                   |
| <b><math>p</math> (GPa)</b>                                                                                                                                                                                       | <b><math>K_o</math> (TPa<sup>-1</sup>)</b> |                                            | <b><math>K_c</math> (TPa<sup>-1</sup>)</b> |                                                   |                                                   |                                                   |
| 0.35                                                                                                                                                                                                              | 55(16)                                     |                                            | -48(14)                                    |                                                   |                                                   |                                                   |
| 0.79                                                                                                                                                                                                              | 53(5)                                      |                                            | -44(4)                                     |                                                   |                                                   |                                                   |
| 0.95                                                                                                                                                                                                              | 53(4)                                      |                                            | -43.6(29)                                  |                                                   |                                                   |                                                   |
| 1.02                                                                                                                                                                                                              | 53(3)                                      |                                            | -43.3(29)                                  |                                                   |                                                   |                                                   |
| 1.17                                                                                                                                                                                                              | 53(4)                                      |                                            | -43(3)                                     |                                                   |                                                   |                                                   |
| 1.3                                                                                                                                                                                                               | 53(5)                                      |                                            | -42(4)                                     |                                                   |                                                   |                                                   |
| 1.36                                                                                                                                                                                                              | 52(6)                                      |                                            | -42(5)                                     |                                                   |                                                   |                                                   |
| 1.47                                                                                                                                                                                                              | 52(6)                                      |                                            | -42(5)                                     |                                                   |                                                   |                                                   |
| 1.5                                                                                                                                                                                                               | 52(7)                                      |                                            | -42(5)                                     |                                                   |                                                   |                                                   |
| 1.56                                                                                                                                                                                                              | 52(7)                                      |                                            | -42(6)                                     |                                                   |                                                   |                                                   |
| 1.78                                                                                                                                                                                                              | 52(9)                                      |                                            | -41(7)                                     |                                                   |                                                   |                                                   |



Table S23. Principal axis strain calculation details for Zn[Au(CN)<sub>2</sub>]<sub>2</sub> II.<sup>29</sup>

| Input data                               |                          |                                 |                         |                                |              |                      |                |          |        |
|------------------------------------------|--------------------------|---------------------------------|-------------------------|--------------------------------|--------------|----------------------|----------------|----------|--------|
| $p$ (GPa)                                | $\sigma p$ (GPa)         | $a$ (Å)                         | $b$ (Å)                 | $c$ (Å)                        | $\alpha$ (°) | $\beta$ (°)          | $\gamma$ (°)   |          |        |
| 2.04                                     | 1                        | 15.227                          | 15.227                  | 44.64                          | 90.0         | 90.0                 | 90.0           |          |        |
| 2.23                                     | 1                        | 15.165                          | 15.165                  | 44.75                          | 90.0         | 90.0                 | 90.0           |          |        |
| 2.37                                     | 1                        | 15.101                          | 15.101                  | 44.85                          | 90.0         | 90.0                 | 90.0           |          |        |
| 3.46                                     | 1                        | 14.71                           | 14.71                   | 45.27                          | 90.0         | 90.0                 | 90.0           |          |        |
| 3.88                                     | 1                        | 14.57                           | 14.57                   | 45.43                          | 90.0         | 90.0                 | 90.0           |          |        |
| 4.69                                     | 1                        | 14.452                          | 14.452                  | 45.66                          | 90.0         | 90.0                 | 90.0           |          |        |
| 6.13                                     | 1                        | 14.117                          | 14.117                  | 45.67                          | 90.0         | 90.0                 | 90.0           |          |        |
| 7.62                                     | 1                        | 14.005                          | 14.005                  | 46.19                          | 90.0         | 90.0                 | 90.0           |          |        |
| 10.66                                    | 1                        | 13.73                           | 13.73                   | 46.2                           | 90.0         | 90.0                 | 90.0           |          |        |
| 14.22                                    | 1                        | 13.342                          | 13.342                  | 45.93                          | 90.0         | 90.0                 | 90.0           |          |        |
| Principal axis strain calculation output |                          |                                 |                         |                                |              |                      |                |          |        |
|                                          |                          |                                 | Direction               |                                |              | Empirical parameters |                |          |        |
| Axes                                     | $K$ (TPa <sup>-1</sup> ) | $\sigma K$ (TPa <sup>-1</sup> ) | $a$                     | $b$                            | $c$          | $\epsilon_0$         | $\lambda$      | $\rho_c$ | $\nu$  |
| $X_1$                                    | 16.1133                  | 1.2338                          | 0.0                     | 1.0                            | -0.0         | 0.0833               | -0.0936        | 1.3862   | 0.3204 |
| $X_2$                                    | 16.1133                  | 1.2338                          | 1.0                     | 0.0                            | -0.0         | 0.0833               | -0.0936        | 1.3862   | 0.3204 |
| $X_3$                                    | -4.4942                  | 0.9505                          | -0.0                    | -0.0                           | 1.0          | -79.7413             | 79.7518        | 1.7485   | 0.0001 |
| V                                        | 16.7411                  | 1.2388                          |                         |                                |              |                      |                |          |        |
| Birch-Murnaghan coefficients             |                          |                                 |                         |                                |              |                      |                |          |        |
|                                          | $B_0$ (GPa)              | $\sigma B_0$ (GPa)              | $V_0$ (Å <sup>3</sup> ) | $\sigma V_0$ (Å <sup>3</sup> ) | $B'$         | $\sigma B'$          | $\rho_c$ (GPa) |          |        |
| 2nd                                      | 27.2682                  | 2.3456                          | 10932.6306              | 129.011                        | 4.0          | n/a                  | 0.0            |          |        |
| 3rd                                      | 16.0205                  | 12.1261                         | 11314.2102              | 592.4585                       | 6.5229       | 3.7073               | 0.0            |          |        |
| 3rd with $P_c$                           | 28.2314                  | 6.9697                          | 10299.1811              | 114.1907                       | 5.617        | 1.9951               | 2.04           |          |        |

Table S23. Principal axis strain calculation details for Zn[Au(CN)<sub>2</sub>]<sub>2</sub> II.<sup>29</sup>- continuation

| Compressibility                                          |                                            |                                            |                                            |                                             |                                             |                                             |
|----------------------------------------------------------|--------------------------------------------|--------------------------------------------|--------------------------------------------|---------------------------------------------|---------------------------------------------|---------------------------------------------|
| <i>p</i> (GPa)                                           | <i>K</i> <sub>1</sub> (TPa <sup>-1</sup> ) | <i>K</i> <sub>2</sub> (TPa <sup>-1</sup> ) | <i>K</i> <sub>3</sub> (TPa <sup>-1</sup> ) | <i>σK</i> <sub>1</sub> (TPa <sup>-1</sup> ) | <i>σK</i> <sub>2</sub> (TPa <sup>-1</sup> ) | <i>σK</i> <sub>3</sub> (TPa <sup>-1</sup> ) |
| 2.04                                                     | 40.0247                                    | 40.0247                                    | -32.8527                                   | 16.2519                                     | 16.2519                                     | 43.2239                                     |
| 2.23                                                     | 33.6533                                    | 33.6533                                    | -19.8907                                   | 7.7344                                      | 7.7344                                      | 10.2256                                     |
| 2.37                                                     | 30.3193                                    | 30.3193                                    | -15.4107                                   | 4.6499                                      | 4.6499                                      | 4.5118                                      |
| 3.46                                                     | 18.2649                                    | 18.2649                                    | -5.5969                                    | 1.2997                                      | 1.2997                                      | 1.1827                                      |
| 3.88                                                     | 16.1133                                    | 16.1133                                    | -4.4942                                    | 1.2338                                      | 1.2338                                      | 0.9505                                      |
| 4.69                                                     | 13.3097                                    | 13.3097                                    | -3.2568                                    | 0.9579                                      | 0.9579                                      | 0.6623                                      |
| 6.13                                                     | 10.4086                                    | 10.4086                                    | -2.1865                                    | 0.5249                                      | 0.5249                                      | 0.4609                                      |
| 7.62                                                     | 8.6452                                     | 8.6452                                     | -1.6317                                    | 0.3683                                      | 0.3683                                      | 0.406                                       |
| 10.66                                                    | 6.5999                                     | 6.5999                                     | -1.0751                                    | 0.5677                                      | 0.5677                                      | 0.3762                                      |
| 14.22                                                    | 5.2924                                     | 5.2924                                     | -0.7683                                    | 0.7701                                      | 0.7701                                      | 0.3517                                      |
| Compressibility reported in original paper <sup>29</sup> |                                            |                                            |                                            |                                             |                                             |                                             |
| <i>p</i> (GPa)                                           | <i>K</i> <sub>o</sub> (TPa <sup>-1</sup> ) |                                            | <i>K</i> <sub>c</sub> (TPa <sup>-1</sup> ) |                                             |                                             |                                             |
| 2.04                                                     | 75(5)                                      |                                            | -51(3)                                     |                                             |                                             |                                             |
| 2.2                                                      | 51(5)                                      |                                            | -31(3)                                     |                                             |                                             |                                             |
| 2.2335                                                   | 48(5)                                      |                                            | -30(3)                                     |                                             |                                             |                                             |
| 2.368                                                    | 39(5)                                      |                                            | -23(3)                                     |                                             |                                             |                                             |
| 2.4                                                      | 38(5)                                      |                                            | -21(3)                                     |                                             |                                             |                                             |
| 3.1                                                      | 22(5)                                      |                                            | -10(3)                                     |                                             |                                             |                                             |
| 3.4575                                                   | 18(5)                                      |                                            | -8(3)                                      |                                             |                                             |                                             |
| 3.6                                                      | 18(5)                                      |                                            | -7(3)                                      |                                             |                                             |                                             |
| 3.8755                                                   | 16(5)                                      |                                            | -6(3)                                      |                                             |                                             |                                             |
| 4.6905                                                   | 13(5)                                      |                                            | -4(3)                                      |                                             |                                             |                                             |
| 4.89                                                     | 13(5)                                      |                                            | -3(3)                                      |                                             |                                             |                                             |
| 6.128                                                    | 10(5)                                      |                                            | -2(3)                                      |                                             |                                             |                                             |
| 7.1                                                      | 9(5)                                       |                                            | -1(3)                                      |                                             |                                             |                                             |
| 7.6165                                                   | 8(5)                                       |                                            | -1(3)                                      |                                             |                                             |                                             |
| 9.54                                                     | 7(5)                                       |                                            | 0(3)                                       |                                             |                                             |                                             |
| 10.66                                                    | 6(5)                                       |                                            | 0(3)                                       |                                             |                                             |                                             |
| 12                                                       | 6(5)                                       |                                            | 0(3)                                       |                                             |                                             |                                             |
| 14.223                                                   | 5(5)                                       |                                            | 0(3)                                       |                                             |                                             |                                             |

Table S24. Principal axis strain calculation details for LOCCA1.<sup>37</sup>

| Input data                               |                            |                                 |                            |                                   |                                   |                                   |              |        |        |
|------------------------------------------|----------------------------|---------------------------------|----------------------------|-----------------------------------|-----------------------------------|-----------------------------------|--------------|--------|--------|
| $p$ (GPa)                                | $\sigma p$ (GPa)           | $a$ (Å)                         | $b$ (Å)                    | $c$ (Å)                           | $\alpha$ (°)                      | $\beta$ (°)                       | $\gamma$ (°) |        |        |
| 0.12                                     | 1                          | 13.47                           | 8.649                      | 13.025                            | 90.0                              | 109.3                             | 90.0         |        |        |
| 0.19                                     | 1                          | 13.491                          | 8.626                      | 12.8826                           | 90.0                              | 109.63                            | 90.0         |        |        |
| 0.23                                     | 1                          | 13.52                           | 8.6272                     | 12.882                            | 90.0                              | 110.29                            | 90.0         |        |        |
| 0.34                                     | 1                          | 13.522                          | 8.6312                     | 12.88                             | 90.0                              | 110.04                            | 90.0         |        |        |
| Principal axis strain calculation output |                            |                                 |                            |                                   |                                   |                                   |              |        |        |
|                                          |                            |                                 | Direction                  |                                   |                                   | Empirical parameters              |              |        |        |
| Axes                                     | $K$ (TPa <sup>-1</sup> )   | $\sigma K$ (TPa <sup>-1</sup> ) | $a$                        | $b$                               | $c$                               | $\epsilon_0$                      | $\lambda$    | $p_c$  | $\nu$  |
| $X_1$                                    | 34.6693                    | nan                             | 0.3398                     | -0.0                              | 0.9405                            | 8.2668                            | -8.288       | 0.1198 | 0.0003 |
| $X_2$                                    | 1.9224                     | nan                             | 0.0                        | 1.0                               | -0.0                              | 0.1518                            | -0.1545      | 0.12   | 0.0009 |
| $X_3$                                    | -24.8607                   | nan                             | 0.9987                     | 0.0                               | -0.0508                           | -5.3334                           | 5.342        | 0.0884 | 0.0005 |
| V                                        | 55.472                     | 28.2567                         |                            |                                   |                                   |                                   |              |        |        |
| Birch-Murnaghan coefficients             |                            |                                 |                            |                                   |                                   |                                   |              |        |        |
|                                          | $B_0$ (GPa)                | $\sigma B_0$ (GPa)              | $V_0$ (Å <sup>3</sup> )    | $\sigma V_0$ (Å <sup>3</sup> )    | $B'$                              | $\sigma B'$                       | $p_c$ (GPa)  |        |        |
| 2nd                                      | 7.801                      | 6.4171                          | 1454.6702                  | 31.2922                           | 4.0                               | n/a                               | 0.0          |        |        |
| 3rd                                      | 46.4834                    | 67.2252                         | 1436.32                    | 7.8691                            | -74.858                           | 60.2275                           | 0.0          |        |        |
| 3rd with $P_c$                           | 36.293                     | 60.2917                         | 1432.1634                  | 4.1382                            | -97.8947                          | 56.4451                           | 0.12         |        |        |
| Compressibility                          |                            |                                 |                            |                                   |                                   |                                   |              |        |        |
| $p$ (GPa)                                | $K_1$ (TPa <sup>-1</sup> ) | $K_2$ (TPa <sup>-1</sup> )      | $K_3$ (TPa <sup>-1</sup> ) | $\sigma K_1$ (TPa <sup>-1</sup> ) | $\sigma K_2$ (TPa <sup>-1</sup> ) | $\sigma K_3$ (TPa <sup>-1</sup> ) |              |        |        |
| 0.12                                     | 15061.4126                 | 88758178.6212                   | -79.9052                   | nan                               | nan                               | nan                               |              |        |        |
| 0.19                                     | 34.6693                    | 1.9224                          | -24.8607                   | nan                               | nan                               | nan                               |              |        |        |
| 0.23                                     | 22.0837                    | 1.2238                          | -17.8402                   | nan                               | nan                               | nan                               |              |        |        |
| 0.34                                     | 11.0522                    | 0.6123                          | -10.0429                   | nan                               | nan                               | nan                               |              |        |        |

Table S25. Principal axis strain calculation details for LUKWAS/LUKWOG (BTCp-dItFB).<sup>27</sup>

| Input data                               |                            |                                 |                            |                                   |                                   |                                   |              |         |        |
|------------------------------------------|----------------------------|---------------------------------|----------------------------|-----------------------------------|-----------------------------------|-----------------------------------|--------------|---------|--------|
| $p$ (GPa)                                | $\sigma p$ (GPa)           | $a$ (Å)                         | $b$ (Å)                    | $c$ (Å)                           | $\alpha$ (°)                      | $\beta$ (°)                       | $\gamma$ (°) |         |        |
| 0.0001                                   | 1.0                        | 17.2451                         | 27.2415                    | 7.9554                            | 90.0                              | 90.0                              | 90.0         |         |        |
| 0.4                                      | 1.0                        | 17.475                          | 26.52                      | 7.662                             | 90.0                              | 90.0                              | 90.0         |         |        |
| 0.7                                      | 1.0                        | 17.449                          | 26.511                     | 7.536                             | 90.0                              | 90.0                              | 90.0         |         |        |
| 1.09                                     | 1.0                        | 17.559                          | 26.315                     | 7.259                             | 90.0                              | 90.0                              | 90.0         |         |        |
| 1.59                                     | 1.0                        | 17.604                          | 25.83                      | 7.13                              | 90.0                              | 90.0                              | 90.0         |         |        |
| 1.95                                     | 1.0                        | 17.564                          | 25.64                      | 7.07                              | 90.0                              | 90.0                              | 90.0         |         |        |
| 2.5                                      | 1.0                        | 17.606                          | 25.58                      | 6.944                             | 90.0                              | 90.0                              | 90.0         |         |        |
| Principal axis strain calculation output |                            |                                 |                            |                                   |                                   |                                   |              |         |        |
|                                          |                            |                                 | Direction                  |                                   |                                   | Empirical parameters              |              |         |        |
| Axes                                     | $K$ (TPa <sup>-1</sup> )   | $\sigma K$ (TPa <sup>-1</sup> ) | $a$                        | $b$                               | $c$                               | $\epsilon_0$                      | $\lambda$    | $p_c$   | $\nu$  |
| $X_1$                                    | 51.2214                    | 5.0105                          | -0.0                       | 0.0                               | 1.0                               | 135.4479                          | -135.4741    | -0.7464 | 0.0007 |
| $X_2$                                    | 21.7061                    | 3.6015                          | -0.0                       | 1.0                               | -0.0                              | -0.0004                           | -0.0375      | 0.0001  | 0.5984 |
| $X_3$                                    | -4.4524                    | 1.4573                          | 1.0                        | 0.0                               | -0.0                              | -0.0178                           | 0.034        | -0.0104 | 0.1422 |
| $V$                                      | 64.5713                    | 6.8323                          |                            |                                   |                                   |                                   |              |         |        |
| Birch-Murnaghan coefficients             |                            |                                 |                            |                                   |                                   |                                   |              |         |        |
|                                          | $B_0$ (GPa)                | $\sigma B_0$ (GPa)              | $V_0$ (Å <sup>3</sup> )    | $\sigma V_0$ (Å <sup>3</sup> )    | $B'$                              | $\sigma B'$                       | $p_c$ (GPa)  |         |        |
| 2nd                                      | 9.8343                     | 0.7679                          | 3701.682                   | 28.3932                           | 4.0                               | n/a                               | 0.0          |         |        |
| 3rd                                      | 5.431                      | 2.424                           | 3757.7874                  | 57.5502                           | 10.9431                           | 5.5951                            | 0.0          |         |        |
| Compressibility                          |                            |                                 |                            |                                   |                                   |                                   |              |         |        |
| $p$ (GPa)                                | $K_1$ (TPa <sup>-1</sup> ) | $K_2$ (TPa <sup>-1</sup> )      | $K_3$ (TPa <sup>-1</sup> ) | $\sigma K_1$ (TPa <sup>-1</sup> ) | $\sigma K_2$ (TPa <sup>-1</sup> ) | $\sigma K_3$ (TPa <sup>-1</sup> ) |              |         |        |
| 0.0001                                   | 125.929                    | 233331633.7819                  | -241.6246                  | 52.8922                           | $2.21 \cdot 10^{22}$              | 2644.8513                         |              |         |        |
| 0.4                                      | 82.0245                    | 32.4672                         | -10.3764                   | 8.9627                            | 22.5723                           | 11.9302                           |              |         |        |
| 0.7                                      | 65.0219                    | 25.9314                         | -6.4807                    | 7.9179                            | 9.4603                            | 3.9019                            |              |         |        |
| 1.09                                     | 51.2214                    | 21.7061                         | -4.4524                    | 5.0105                            | 3.6015                            | 1.4573                            |              |         |        |
| 1.59                                     | 40.2664                    | 18.6521                         | -3.2289                    | 5.0434                            | 4.4674                            | 1.966                             |              |         |        |
| 1.95                                     | 34.8938                    | 17.1843                         | -2.7131                    | 7.2163                            | 5.9388                            | 2.3042                            |              |         |        |
| 2.5                                      | 28.9858                    | 15.5523                         | -2.1945                    | 10.2558                           | 7.5955                            | 2.5567                            |              |         |        |

Table S26. Principal axis strain calculation details for OTELEH.<sup>41</sup>

| Input data                               |                          |                                 |           |         |              |                      |              |          |        |
|------------------------------------------|--------------------------|---------------------------------|-----------|---------|--------------|----------------------|--------------|----------|--------|
| $\rho$ (GPa)                             | $\sigma\rho$ (GPa)       | $a$ (Å)                         | $b$ (Å)   | $c$ (Å) | $\alpha$ (°) | $\beta$ (°)          | $\gamma$ (°) |          |        |
| 0.000101                                 | 1                        | 9.7872                          | 8.4868    | 7.407   | 90.0         | 100.43               | 90.0         |          |        |
| 0.1                                      | 1                        | 9.7823                          | 8.4929    | 7.412   | 90.0         | 100.44               | 90.0         |          |        |
| 0.36                                     | 1                        | 9.7272                          | 8.4963    | 7.332   | 90.0         | 100.45               | 90.0         |          |        |
| 0.51                                     | 1                        | 9.6758                          | 8.4905    | 7.306   | 90.0         | 100.43               | 90.0         |          |        |
| 0.88                                     | 1                        | 9.6118                          | 8.4921    | 7.251   | 90.0         | 100.4                | 90.0         |          |        |
| 1.21                                     | 1                        | 9.5551                          | 8.501     | 7.182   | 90.0         | 100.35               | 90.0         |          |        |
| 1.63                                     | 1                        | 9.4961                          | 8.5028    | 7.127   | 90.0         | 100.38               | 90.0         |          |        |
| 1.94                                     | 1                        | 9.4462                          | 8.5075    | 7.057   | 90.0         | 100.46               | 90.0         |          |        |
| 2.46                                     | 1                        | 9.3869                          | 8.5115    | 6.98    | 90.0         | 100.5                | 90.0         |          |        |
| 3.08                                     | 1                        | 9.3265                          | 8.5118    | 6.889   | 90.0         | 100.68               | 90.0         |          |        |
| 3.6                                      | 1                        | 9.2779                          | 8.5031    | 6.835   | 90.0         | 100.76               | 90.0         |          |        |
| 4.06                                     | 1                        | 9.2492                          | 8.5144    | 6.769   | 90.0         | 100.94               | 90.0         |          |        |
| 4.54                                     | 1                        | 9.2008                          | 8.5014    | 6.745   | 90.0         | 100.94               | 90.0         |          |        |
| 5.0                                      | 1                        | 9.1703                          | 8.4987    | 6.695   | 90.0         | 101.01               | 90.0         |          |        |
| 5.52                                     | 1                        | 9.1302                          | 8.4972    | 6.657   | 90.0         | 101.0                | 90.0         |          |        |
| 6.0                                      | 1                        | 9.1044                          | 8.4959    | 6.628   | 90.0         | 100.98               | 90.0         |          |        |
| 6.52                                     | 1                        | 9.07                            | 8.4856    | 6.61    | 90.0         | 100.98               | 90.0         |          |        |
| Principal axis strain calculation output |                          |                                 |           |         |              |                      |              |          |        |
|                                          |                          |                                 | Direction |         |              | Empirical parameters |              |          |        |
| Axes                                     | $K$ (TPa <sup>-1</sup> ) | $\sigma K$ (TPa <sup>-1</sup> ) | $a$       | $b$     | $c$          | $\epsilon_0$         | $\lambda$    | $\rho_c$ | $\nu$  |
| $X_1$                                    | 11.8879                  | 0.2057                          | 0.9971    | 0.0     | 0.0758       | 29.463               | -29.4245     | -2.0192  | 0.0018 |
| $X_2$                                    | 19.4528                  | 0.378                           | 0.0941    | -0.0    | 0.9956       | 142.4574             | -142.3235    | -3.2553  | 0.0008 |
| $X_3$                                    | -0.0929                  | 0.1068                          | 0.0       | 1.0     | -0.0         | -2.9759              | 2.9773       | -0.0018  | 0.0001 |
| V                                        | 27.6807                  | 1.3696                          |           |         |              |                      |              |          |        |

Table S26. Principal axis strain calculation details for OTELEH.<sup>41</sup>- continuation

| Birch-Murnaghan coefficients |                            |                            |                            |                                   |                                   |                                   |             |
|------------------------------|----------------------------|----------------------------|----------------------------|-----------------------------------|-----------------------------------|-----------------------------------|-------------|
|                              | $B_0$ (GPa)                | $\sigma B_0$ (GPa)         | $V_0$ (Å <sup>3</sup> )    | $\sigma V_0$ (Å <sup>3</sup> )    | $B'$                              | $\sigma B'$                       | $p_c$ (GPa) |
| 2nd                          | 22.4253                    | 0.5695                     | 603.0737                   | 1.5866                            | 4.0                               | n/a                               | 0.0         |
| 3rd                          | 15.7656                    | 1.183                      | 608.8599                   | 1.7233                            | 7.5085                            | 0.7596                            | 0.0         |
| Compressibility              |                            |                            |                            |                                   |                                   |                                   |             |
| $p$ (GPa)                    | $K_1$ (TPa <sup>-1</sup> ) | $K_2$ (TPa <sup>-1</sup> ) | $K_3$ (TPa <sup>-1</sup> ) | $\sigma K_1$ (TPa <sup>-1</sup> ) | $\sigma K_2$ (TPa <sup>-1</sup> ) | $\sigma K_3$ (TPa <sup>-1</sup> ) |             |
| 0.0001                       | 26.3317                    | 34.1371                    | -119.1266                  | 1.9326                            | 3.127                             | 1646.6524                         |             |
| 0.1                          | 25.0926                    | 33.1214                    | -2.2453                    | 1.527                             | 2.7207                            | 4.4466                            |             |
| 0.36                         | 22.3552                    | 30.7412                    | -0.6319                    | 0.8132                            | 1.9077                            | 0.8388                            |             |
| 0.51                         | 21.0317                    | 29.5175                    | -0.4467                    | 0.562                             | 1.5644                            | 0.5187                            |             |
| 0.88                         | 18.3521                    | 26.8784                    | -0.2593                    | 0.2783                            | 0.9912                            | 0.2559                            |             |
| 1.21                         | 16.4799                    | 24.8935                    | -0.1887                    | 0.2572                            | 0.7023                            | 0.1818                            |             |
| 1.63                         | 14.5864                    | 22.755                     | -0.1401                    | 0.2659                            | 0.5081                            | 0.1408                            |             |
| 1.94                         | 13.4463                    | 21.3982                    | -0.1178                    | 0.2527                            | 0.4336                            | 0.1242                            |             |
| 2.46                         | 11.8879                    | 19.4528                    | -0.0929                    | 0.2057                            | 0.378                             | 0.1068                            |             |
| 3.08                         | 10.4449                    | 17.5504                    | -0.0742                    | 0.1467                            | 0.3908                            | 0.0937                            |             |
| 3.6                          | 9.48                       | 16.2202                    | -0.0635                    | 0.1274                            | 0.4516                            | 0.0858                            |             |
| 4.06                         | 8.7639                     | 15.201                     | -0.0563                    | 0.1439                            | 0.5278                            | 0.0802                            |             |
| 4.54                         | 8.1237                     | 14.2657                    | -0.0503                    | 0.1808                            | 0.6175                            | 0.0753                            |             |
| 5.0                          | 7.5923                     | 13.4714                    | -0.0457                    | 0.2216                            | 0.7062                            | 0.0712                            |             |
| 5.52                         | 7.0695                     | 12.6737                    | -0.0414                    | 0.2672                            | 0.8046                            | 0.0673                            |             |
| 6.0                          | 6.6471                     | 12.0169                    | -0.0381                    | 0.3062                            | 0.8911                            | 0.0641                            |             |
| 6.52                         | 6.243                      | 11.3782                    | -0.0351                    | 0.3445                            | 0.9789                            | 0.061                             |             |

Table S27. Principal axis strain calculation details for VOFVAN. <sup>38</sup>

| Input data                               |                            |                                 |                            |                                   |                                   |                                   |              |       |        |
|------------------------------------------|----------------------------|---------------------------------|----------------------------|-----------------------------------|-----------------------------------|-----------------------------------|--------------|-------|--------|
| $p$ (GPa)                                | $\sigma p$ (GPa)           | $a$ (Å)                         | $b$ (Å)                    | $c$ (Å)                           | $\alpha$ (°)                      | $\beta$ (°)                       | $\gamma$ (°) |       |        |
| 1.0                                      | 1                          | 8.953                           | 3.865                      | 13.081                            | 90.0                              | 90.47                             | 90.0         |       |        |
| 2.0                                      | 1                          | 9.047                           | 3.6626                     | 12.7481                           | 90.0                              | 92.304                            | 90.0         |       |        |
| 3.5                                      | 1                          | 9.0625                          | 3.5605                     | 12.5539                           | 90.0                              | 92.541                            | 90.0         |       |        |
| 6.2                                      | 1                          | 9.0721                          | 3.4383                     | 12.285                            | 90.0                              | 92.72                             | 90.0         |       |        |
| Principal axis strain calculation output |                            |                                 |                            |                                   |                                   |                                   |              |       |        |
|                                          |                            |                                 | Direction                  |                                   |                                   | Empirical parameters              |              |       |        |
| Axes                                     | $K$ (TPa <sup>-1</sup> )   | $\sigma K$ (TPa <sup>-1</sup> ) | $a$                        | $b$                               | $c$                               | $\epsilon_0$                      | $\lambda$    | $p_c$ | $\nu$  |
| $X_1$                                    | 25.1819                    | nan                             | 0.0                        | 1.0                               | -0.0                              | -0.0                              | -0.0534      | 1.0   | 0.4715 |
| $X_2$                                    | 14.4966                    | nan                             | 0.4874                     | 0.0                               | 0.8732                            | -0.0001                           | -0.0312      | 1.0   | 0.465  |
| $X_3$                                    | -0.9325                    | nan                             | 0.9686                     | 0.0                               | -0.2486                           | -0.151                            | 0.1675       | 1.0   | 0.0056 |
| V                                        | 27.4607                    | 4.033                           |                            |                                   |                                   |                                   |              |       |        |
| Birch-Murnaghan coefficients             |                            |                                 |                            |                                   |                                   |                                   |              |       |        |
|                                          | $B_0$ (GPa)                | $\sigma B_0$ (GPa)              | $V_0$ (Å <sup>3</sup> )    | $\sigma V_0$ (Å <sup>3</sup> )    | $B'$                              | $\sigma B'$                       | $p_c$ (GPa)  |       |        |
| 2nd                                      | 20.3478                    | 4.2182                          | 465.4972                   | 10.8783                           | 4.0                               | n/a                               | 0.0          |       |        |
| 3rd                                      | 0.0227                     | 3970.9403                       | 513.9342                   | 28749.7392                        | 3124.4678                         | 545151911.6272                    | 0.0          |       |        |
| 3rd with $P_c$                           | 8.5039                     | 4.8936                          | 451.4284                   | 6.2087                            | 23.1314                           | 13.2673                           | 1.0          |       |        |
| Compressibility                          |                            |                                 |                            |                                   |                                   |                                   |              |       |        |
| $p$ (GPa)                                | $K_1$ (TPa <sup>-1</sup> ) | $K_2$ (TPa <sup>-1</sup> )      | $K_3$ (TPa <sup>-1</sup> ) | $\sigma K_1$ (TPa <sup>-1</sup> ) | $\sigma K_2$ (TPa <sup>-1</sup> ) | $\sigma K_3$ (TPa <sup>-1</sup> ) |              |       |        |
| 1.0                                      | 6799334161.5735            | 4981241947.5033                 | -104746332.035             | nan                               | nan                               | nan                               |              |       |        |
| 2.0                                      | 25.1819                    | 14.4966                         | -0.9325                    | nan                               | nan                               | nan                               |              |       |        |
| 3.5                                      | 15.5165                    | 8.8789                          | -0.3749                    | nan                               | nan                               | nan                               |              |       |        |
| 6.2                                      | 10.5368                    | 6.0005                          | -0.181                     | nan                               | nan                               | nan                               |              |       |        |

Table S28. Principal axis strain calculation details for YIHHON.<sup>39</sup>

| Input data                               |                            |                                 |                            |                                   |                                   |                                   |              |       |        |
|------------------------------------------|----------------------------|---------------------------------|----------------------------|-----------------------------------|-----------------------------------|-----------------------------------|--------------|-------|--------|
| $p$ (GPa)                                | $\sigma p$ (GPa)           | $a$ (Å)                         | $b$ (Å)                    | $c$ (Å)                           | $\alpha$ (°)                      | $\beta$ (°)                       | $\gamma$ (°) |       |        |
| 2.48                                     | 0.02                       | 5.918                           | 7.7502                     | 8.2755                            | 90.0                              | 90.0                              | 90.0         |       |        |
| 2.9                                      | 0.02                       | 5.9522                          | 7.6818                     | 8.1087                            | 90.0                              | 90.0                              | 90.0         |       |        |
| 3.35                                     | 0.02                       | 5.9823                          | 7.6367                     | 7.9823                            | 90.0                              | 90.0                              | 90.0         |       |        |
| 3.68                                     | 0.02                       | 6.0049                          | 7.5908                     | 7.888                             | 90.0                              | 90.0                              | 90.0         |       |        |
| Principal axis strain calculation output |                            |                                 |                            |                                   |                                   |                                   |              |       |        |
|                                          |                            |                                 | Direction                  |                                   |                                   | Empirical parameters              |              |       |        |
| Axes                                     | $K$ (TPa <sup>-1</sup> )   | $\sigma K$ (TPa <sup>-1</sup> ) | $a$                        | $b$                               | $c$                               | $\epsilon_0$                      | $\lambda$    | $p_c$ | $\nu$  |
| $X_1$                                    | 39.3254                    | nan                             | -0.0                       | -0.0                              | 1.0                               | -0.0                              | -0.041       | 2.48  | 0.8246 |
| $X_2$                                    | 16.8161                    | nan                             | -0.0                       | 1.0                               | 0.0                               | -0.0001                           | -0.0174      | 2.48  | 0.8461 |
| $X_3$                                    | -12.0829                   | nan                             | 1.0                        | 0.0                               | -0.0                              | 0.0                               | 0.0123       | 2.48  | 0.8915 |
| V                                        | 43.0708                    | 1.8044                          |                            |                                   |                                   |                                   |              |       |        |
| Birch-Murnaghan coefficients             |                            |                                 |                            |                                   |                                   |                                   |              |       |        |
|                                          | $B_0$ (GPa)                | $\sigma B_0$ (GPa)              | $V_0$ (Å <sup>3</sup> )    | $\sigma V_0$ (Å <sup>3</sup> )    | $B'$                              | $\sigma B'$                       | $p_c$ (GPa)  |       |        |
| 2 <sup>nd</sup>                          | 11.296                     | 1.0597                          | 444.6265                   | 5.7496                            | 4.0                               | n/a                               | 0.0          |       |        |
| 3 <sup>rd</sup>                          | 0.0442                     | 1808.1917                       | 546.6209                   | 62548.3065                        | 355.0833                          | 14246417.6807                     | 0.0          |       |        |
| 3rd with $P_c$                           | 17.3155                    | 4.0431                          | 379.4074                   | 1.0025                            | 10.2068                           | 9.0454                            | 2.48         |       |        |
| Compressibility                          |                            |                                 |                            |                                   |                                   |                                   |              |       |        |
| $p$ (GPa)                                | $K_1$ (TPa <sup>-1</sup> ) | $K_2$ (TPa <sup>-1</sup> )      | $K_3$ (TPa <sup>-1</sup> ) | $\sigma K_1$ (TPa <sup>-1</sup> ) | $\sigma K_2$ (TPa <sup>-1</sup> ) | $\sigma K_3$ (TPa <sup>-1</sup> ) |              |       |        |
| 2.48                                     | 16677.7332                 | 2284.0323                       | -509.9918                  | nan                               | nan                               | nan                               |              |       |        |
| 2.9                                      | 39.3254                    | 16.8161                         | -12.0829                   | nan                               | nan                               | nan                               |              |       |        |
| 3.35                                     | 34.6086                    | 15.0335                         | -11.1646                   | nan                               | nan                               | nan                               |              |       |        |
| 3.68                                     | 32.71                      | 14.3077                         | -10.7817                   | nan                               | nan                               | nan                               |              |       |        |



Table S29. Compressibility  $K$  (TPa<sup>-1</sup>) for InH(BDC)<sub>2</sub> from Figure 2 of the original paper<sup>19</sup>.

| $p$ (GPa) | $K$ (TPa <sup>-1</sup> ) |
|-----------|--------------------------|
| 0.0001    | -117.183                 |
| 0.04      | -97.042                  |
| 0.099     | -80.563                  |
| 0.216     | -68.357                  |
| 0.323     | -62.254                  |
| 0.442     | -57.981                  |
| 0.534     | -55.54                   |

Function fitted to the  $K$  values:  $K = -47.10638 \times (p + 0.03608)^{-0.27525}$  ( $R^2 = 0.99878$ ).

Table S30. Compressibility  $K$  (TPa<sup>-1</sup>) for MIL-53(Al) from Figure 2 of the original paper<sup>20</sup>.

| $p$ (GPa) | $K$ (TPa <sup>-1</sup> ) |
|-----------|--------------------------|
| 0.0001    | -39.273                  |
| 0.292     | -22.909                  |
| 0.901     | -12.545                  |
| 1.807     | -7.091                   |

Function fitted to the  $K$  values:  $K = -40.5622 + 27.83138 \times p^{0.33953}$  ( $R^2 = 0.99652$ )

#### 4. Compressibility capacity values for selected NLC materials

Table S31. Compressibility capacity values calculated for selected NLC materials.

| NLC material                              | $\chi_K$ (%) for selected $\Delta p$ (GPa) |          |          |          |                                             |
|-------------------------------------------|--------------------------------------------|----------|----------|----------|---------------------------------------------|
|                                           | 0.15 GPa                                   | 0.90 GPa | 2.00 GPa | 3.00 GPa | Complete pressure range (given in brackets) |
| ETYFUM                                    | 0.52                                       | 2.595    | 4.721    | 6.152    | 6.846 (0.1 MPa-3.58 GPa)                    |
| CPOS-1                                    | 0.059                                      | 2.503    | -        | -        | 5.401 (1.02-2.32 GPa)                       |
| water@CPOS-1                              | 0.057                                      | 0.712    | -        | -        | 2.113 (0.58-2.53 GPa)                       |
| BIUREA II                                 | 0.827                                      | 1.766    | 2.231    | -        | 2.285 (0.62-2.81 GPa)                       |
| QAXMEH yellow                             | 0.054                                      | 0.42     | 1.044    | -        | 1.225 (0.54-2.84 GPa)                       |
| IZIYOI hp                                 | 0.052                                      | 0.858    | -        | -        | 1.059 (1.36-2.39 GPa)                       |
| SULBAC                                    | 0.024                                      | 0.328    | -        | -        | 0.984 (0.91-2.83 GPa)                       |
| POWSID                                    | 0.391                                      | 1.321    | 1.931    | -        | 2.039 (0.1MPa-2.28 GPa)                     |
| JOHGIX                                    | 0.892                                      | 2.85     | 4.077    | -        | 4.389 (0.1MPa-2.42 GPa)                     |
| MAGVOG I                                  | 0.428                                      | 2.544    | -        | -        | 2.544 (0.1MPa-0.9 GPa)                      |
| UNIRUF II                                 | 0.128                                      | 1.047    | 2.644    | 4.229    | 5.056 (2.01-5.51 GPa)                       |
| Ag <sub>3</sub> [Co(CN) <sub>6</sub> ] I  | 1.096                                      | -        | -        | -        | 1.164 (0.1 MPa-0.157 GPa)-                  |
| Ag <sub>3</sub> [Co(CN) <sub>6</sub> ] II | 0.512                                      | 1.617    | 2.56     | 3.208    | 5.251 (0.19-7.65 GPa)                       |
| Zn[Au(CN) <sub>2</sub> ] <sub>2</sub> I   | 0.605                                      | 3.479    | -        | -        | 5.374 (0.35-1.75 GPa)                       |
| Zn[Au(CN) <sub>2</sub> ] <sub>2</sub> II  | 0.4                                        | 1.352    | 1.978    | 2.325    | 3.602 (2.04-14.44 GPa)                      |
| InH(BDC) <sub>2</sub>                     | 1.34                                       | -        | -        | -        | 3.72 (0.1 MPa-0.53 GPa)                     |
| MIL-53(Al)                                | 0.45                                       | 1.85     | -        | -        | 2.74 0.1 MPa-1.8 GPa)                       |

## 5. Wine rack motif geometry.

Table S32. parameters of a triangle formed by centroids acting as hinge points in structure of ETYFUM for pressure in 0.1 MPa-3.58 GPa range.

| $p$ (GPa) | $d_1$ (Å) | $d_2$ (Å) | $h$ (Å) | $\varphi$ (°) |
|-----------|-----------|-----------|---------|---------------|
| 0.0001    | 3.896     | 4.817     | 3.06    | 76.36         |
| 0.08      | 3.896     | 4.788     | 3.07    | 75.84         |
| 0.15      | 3.904     | 4.773     | 3.09    | 75.36         |
| 0.29      | 3.877     | 4.702     | 3.08    | 74.66         |
| 0.35      | 3.883     | 4.659     | 3.11    | 73.74         |
| 0.53      | 3.865     | 4.592     | 3.11    | 72.9          |
| 0.79      | 3.882     | 4.521     | 3.16    | 71.22         |
| 0.88      | 3.853     | 4.482     | 3.13    | 71.12         |
| 1.25      | 3.839     | 4.376     | 3.15    | 69.48         |
| 1.33      | 3.837     | 4.317     | 3.17    | 68.48         |
| 1.85      | 3.84      | 4.246     | 3.2     | 67.14         |
| 2.44      | 3.852     | 4.15      | 3.25    | 65.18         |
| 3         | 3.841     | 4.056     | 3.26    | 63.74         |
| 3.58      | 3.884     | 3.993     | 3.35    | 61.86         |

Table S33. Functions fitted to parameters of a the triangle formed by centroids acting as hinge points.

| Parameter ( $y$ ) | Fitted function ( $y = a - bc^x$ )          | $R^2$   |
|-------------------|---------------------------------------------|---------|
| $d_1$             | $d_1 = 3.8498 + 0.05528 * 0.13452^p$        | 0.63888 |
| $d_2$             | $d_2 = 3.81982 + 1.00592 * 0.6191^p$        | 0.99751 |
| $h$               | $h = 44.62773 - 41.5565 * 0.99826^p$        | 0.96756 |
| $\varphi$         | $\varphi = 56.70518 + 19.60681 * 0.70146^p$ | 0.99713 |

## 6. H-bond energy.

Table S34. Complexation energy calculated for selected aggregates of ETY and FUM. Short O-H...N hydrogen bond is shown in yellow and longer C-H...O hydrogen bond is shown in purple in the figures representing two types of ETY and FUM aggregates.

| Aggregate                          |           | 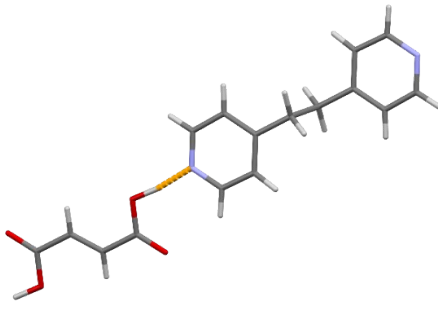 |  |
|------------------------------------|-----------|------------------------------------------------------------------------------------|-------------------------------------------------------------------------------------|
| H-bond                             |           | O-H...N                                                                            | C-H...O                                                                             |
| Counterpoise corrected energy (Ha) |           | -1029.726279065285                                                                 | -1029.701476005206                                                                  |
| BSSE energy (Ha)                   |           | 0.001869589899                                                                     | 0.001331073901                                                                      |
| Sum of fragments (Ha)              |           | -1029.702232724450                                                                 | -1029.702236872457                                                                  |
| Complexation energy (kcal/mol)     | Raw       | -16.26                                                                             | -0.36                                                                               |
|                                    | Corrected | -15.09                                                                             | 0.48                                                                                |

## Figures

### 1. Sample crystals

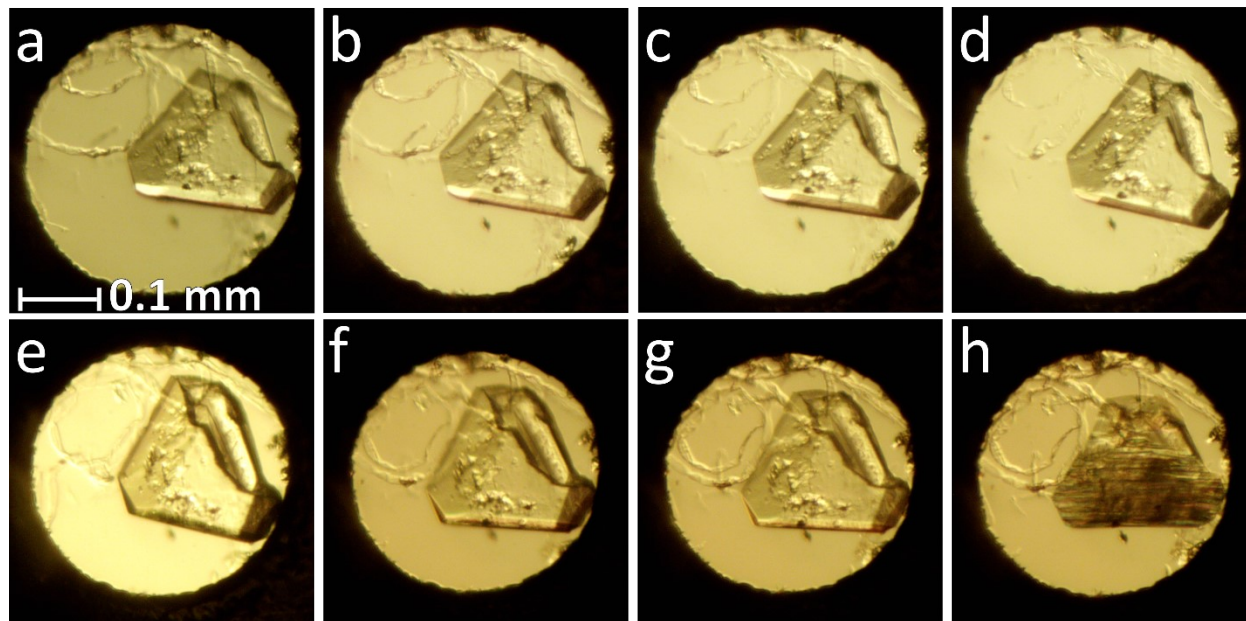

Figure S1. Sample crystal A at 298 K and (a) 3.00(2) GPa, gradually decompressed to (b) 2.44(2) GPa, (c) 1.85(2) GPa, (d) 1.25(2) GPa and (e) 0.35(2) GPa. Sample was then compressed from 0.35 GPa to (f) 2.02(2) GPa, (g) 2.06(2) GPa and (h) 3.75(2) GPa, when sample crystal was destroyed. Scale for all segments is included in lower left corner of segment (a). Cellulose fibers used to hold sample crystal in place is visible in the upper part of the chamber, while ruby chip used for pressure measurement is visible in the lower right part of the chamber next to the gasket edge.

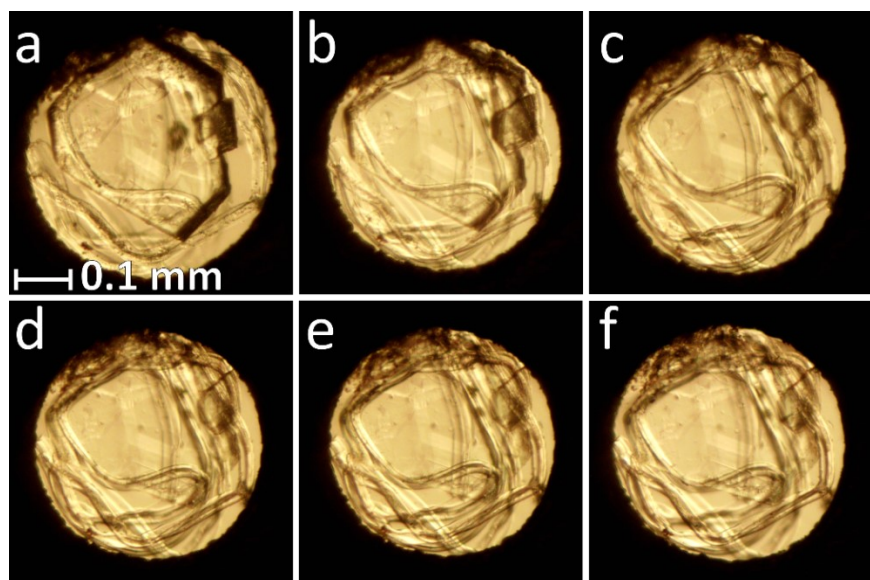

Figure S2. Sample crystal B at 298 K and (a) 0.1 MPa (just after loading sample into DAC), compressed rapidly to (f) 3.58 GPa. Pictures were taken on compression at (b) 0.64(2) GPa, (c) 1.50(2) GPa, (d) 2.49(2) GPa and (e) 3.22(2) GPa. Scale for all segments is included in lower left corner of segment (a). Cellulose fibers used to hold sample crystal in place is visible around sample crystal, while ruby chip used for pressure measurement is visible in the upper right part of the chamber next to the sample crystal.

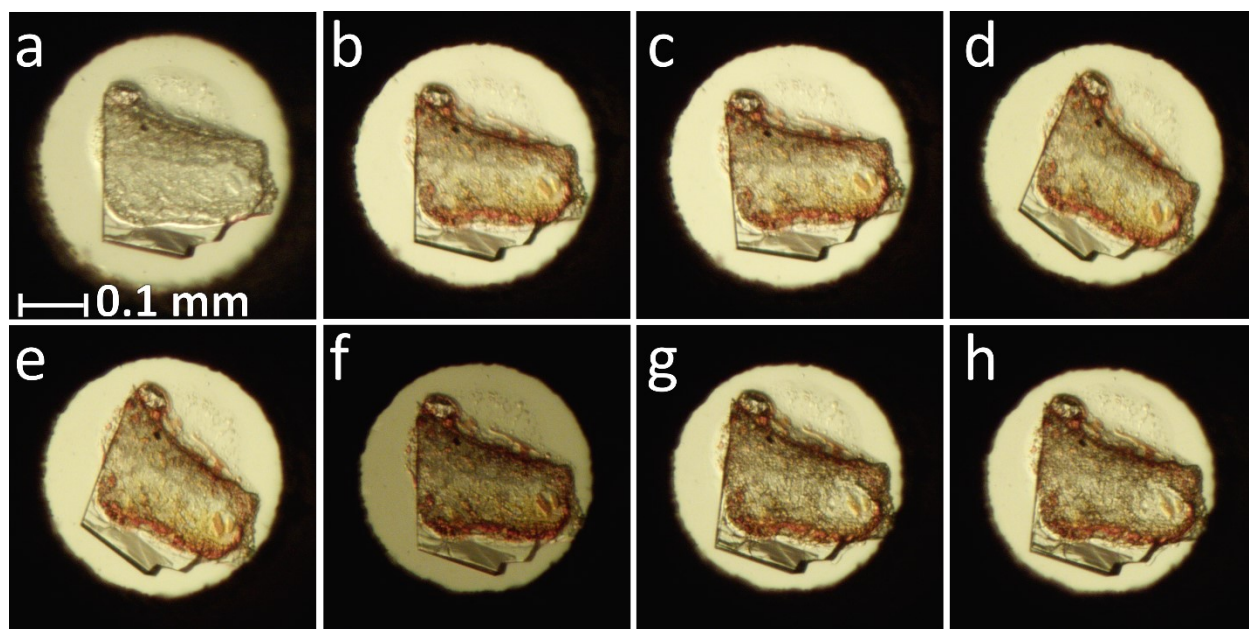

Figure S3. Sample crystal C at 298 K and at 298 K and (a) 0.1 MPa (just after loading sample into DAC), gradually compressed to (b,c) 0.29(2) GPa, (d) 0.53(2) GPa, (e) 0.88(2) GPa and (f) 1.33(2) GPa. Sample was then decompressed down to ambient pressure and compressed to (g) 0.08(2) GPa and subsequently to (h) 0.15(2) GPa. Scale for all segments is included in lower left corner of segment (a). A drop of glue used to hold sample crystal in place, and to assure its tilted position is visible “under” the sample crystal. Ruby chip used for pressure measurement is visible in the upper part of the chamber, next to the left upper corner of the sample crystal.

## 2. PXRD patterns

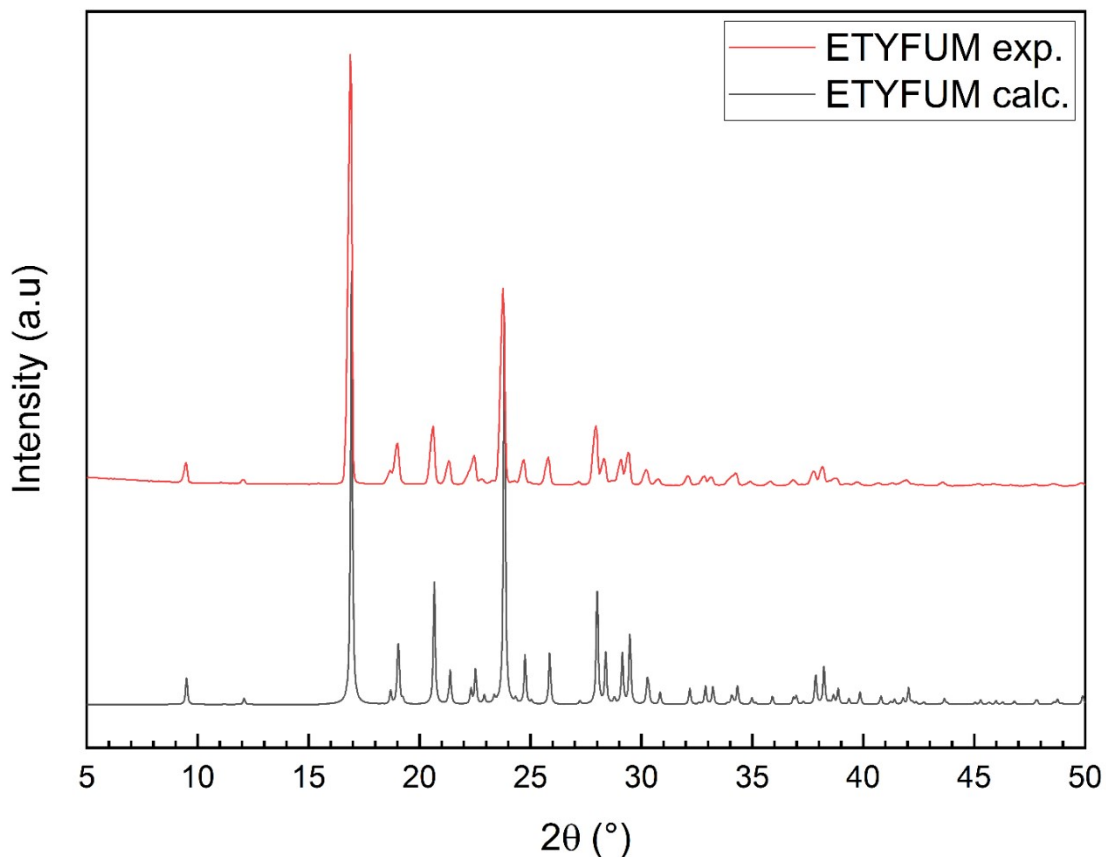

Figure S4. PXRD patterns of ETYFUM: calculated based on crystal structure (black) and experimental pattern measured for powder sample of ETYFUM received after solvent-assisted ball milling (red).

## 3. Principal axis strain of ETYFUM

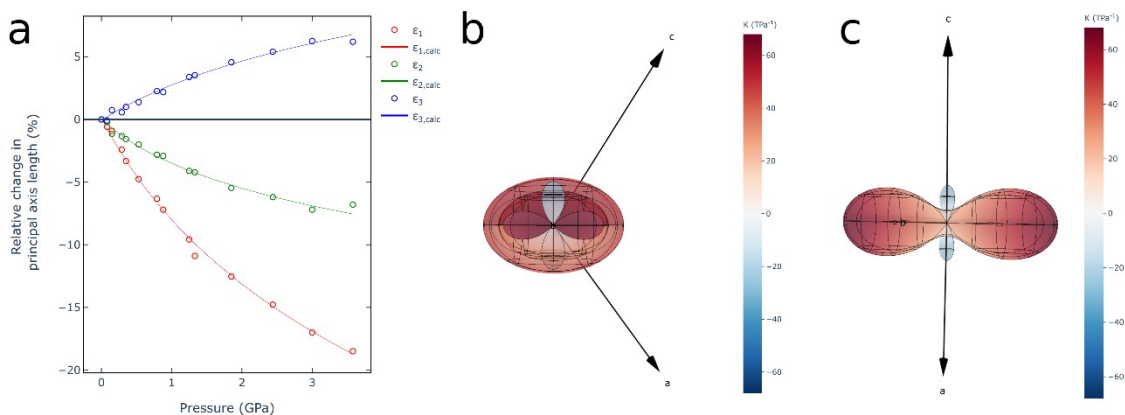

Figure S5. Relative change in length of the principal axes in function of pressure (a), and compressibility indicatrix plots (b,c) representing compressibility tensors for ETYFUM all data (0.1 MPa-3.58 GPa pressure range). The indicatrix plots are shown along crystallographic axis  $b$  (b), and along direction [101] (c). Positive and negative linear compressibility is marked in red and blue, respectively, in the indicatrix plots.

#### 4. Molecular aggregation and wine rack motif geometry

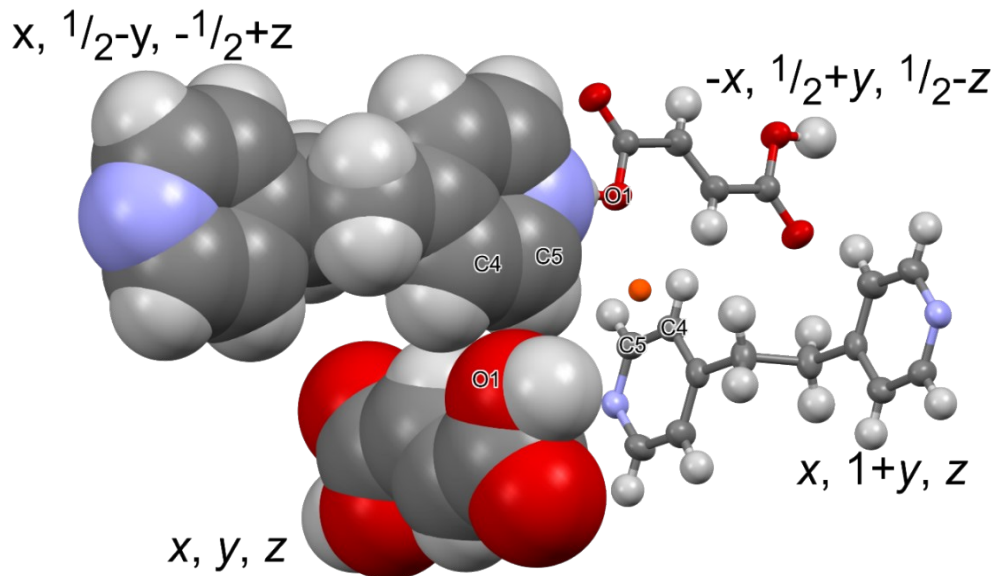

Figure S6. The respective positioning of ETY and FUM molecules at 298K/0.1 MPa, showing oxygen atom O1 interlocked between carbon atoms C4 and C5. Molecules are shown in spacefill and ellipsoid styles in program Mercury. An orange sphere represents centroid calculated for atoms O1, C4 and C5. The symmetry code for each molecule is listed next to it.

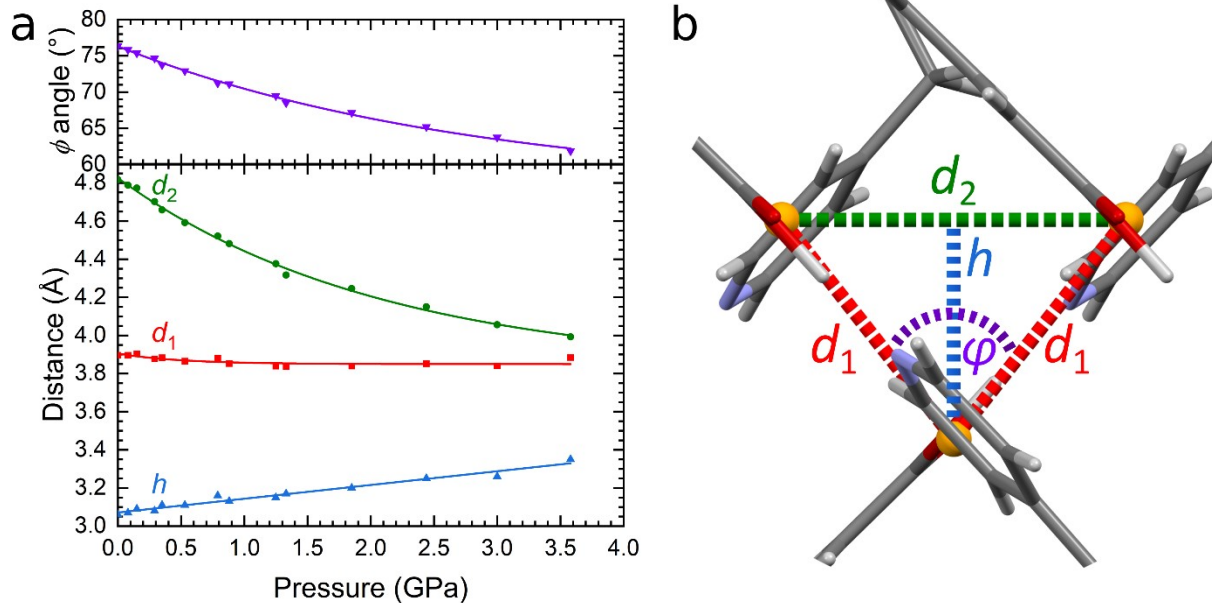

Figure S7. Pressure dependence of parameters  $d_1$ ,  $d_2$ ,  $h$  and  $\phi$  of the triangle formed by centroids acting as hinge points (a) and fragment of ETYFUM structure (at 0.1 MPa/298 K) with the 'triangle' marked (orange centroids marking corners, red and green dashed lines marking sides and base of the triangle, respectively, height marked with blue dashed line and angle between triangle sides marked by purple arc).

Solid lines in graph in pane (a) show functions  $y = a - bc^x$  (where  $x$  is pressure in GPa, see Table S26) fitted to data measured from experimentally determined structures.

## 5. Negative Linear Compressibility

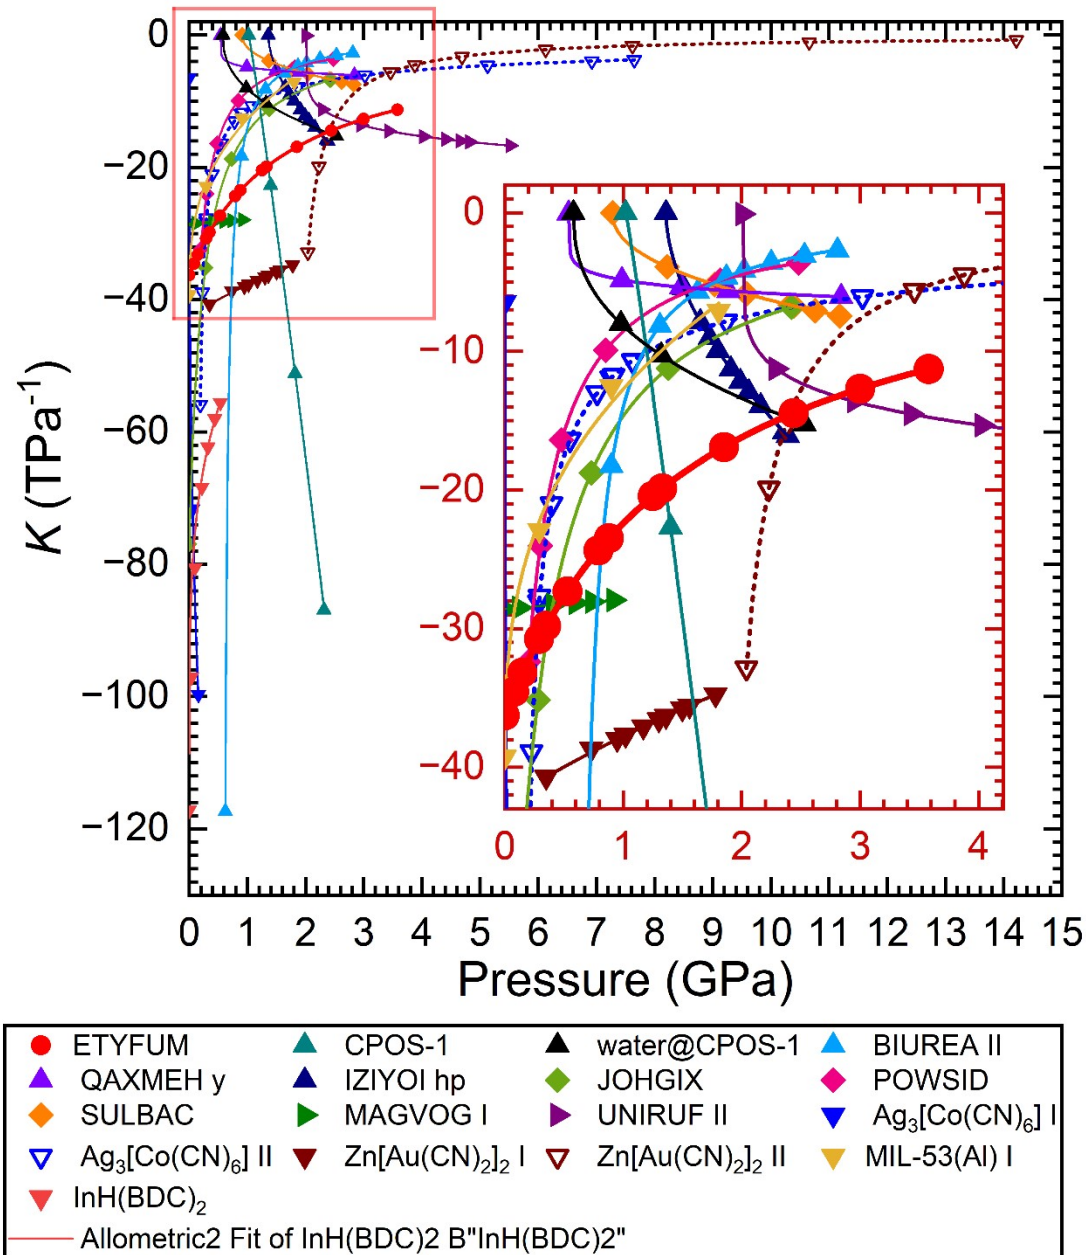

Figure S8. Pressure dependence of negative linear compressibility for selected NLC materials. The insert magnifies the 0.1 MPa-2.4 GPa pressure range for compressibility down to -46 TPa<sup>-1</sup> for clearer presentation of data. Where possible materials are referenced by their REFCODES from Cambridge Structure Database (CSD)<sup>18</sup>. The names of the compounds are followed by information about polymorph (where applicable): yellow - yellow polymorph; hp - high-pressure polymorph; I- Phase I; II- Phase II. In case two polymorphs exhibit NLC, both are plotted in the same color but phases from higher pressure is



represented with dashed lines. Symbol shape corresponds to the type of the crystal: circle – ETYFUM; triangle - organic crystals, diamond – metal complexes, right-side triangle - inorganic-organic frameworks and coordination polymers selected from CSD datamining results; upside-down triangle – other framework materials selected from previous reports.

## 6. Compressibility capacity

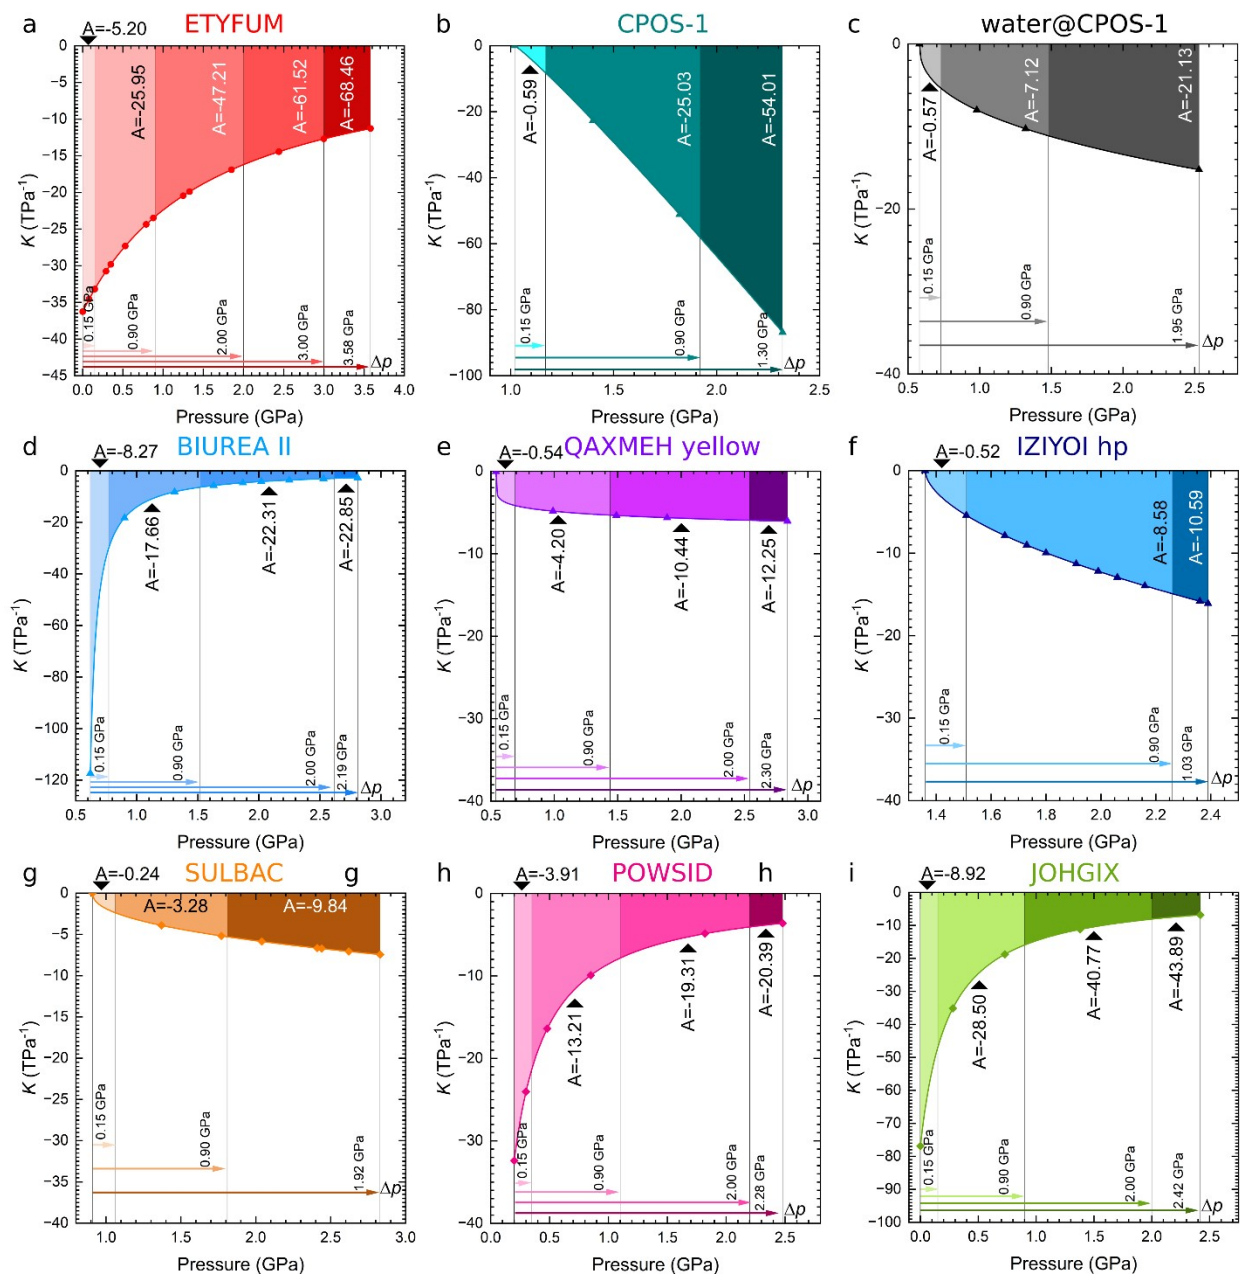

Figure S9. Evolution of compressibility with pressure for selected NLC materials (Part 1). Names of the compounds are included above the respective graphs. The names of the compounds are followed by information about polymorph (where applicable): yellow - yellow polymorph; hp - high-pressure polymorph; I- Phase I; II- Phase II. The arrows mark the  $\Delta p$  widths for which integration was done, with the results of the integration also included in the figure (the color of the arrow corresponds to the color

of the area between function and top axis). For each compound, same  $p_{\min}$  was selected for integration and only  $p_{\max}$  progressively increases (the areas for different integrations overlap, with the area for wider  $\Delta p$  being partially covered by areas marking preceding integrations). As compressibility  $K$  is expressed in  $\text{TPa}^{-1}$  and pressure in GPa, the values included in the graphs should be multiplied by  $10^{-3}$  to allow for unit conversion. Those corrected values can be multiplied by  $10^2$  to express them in %.

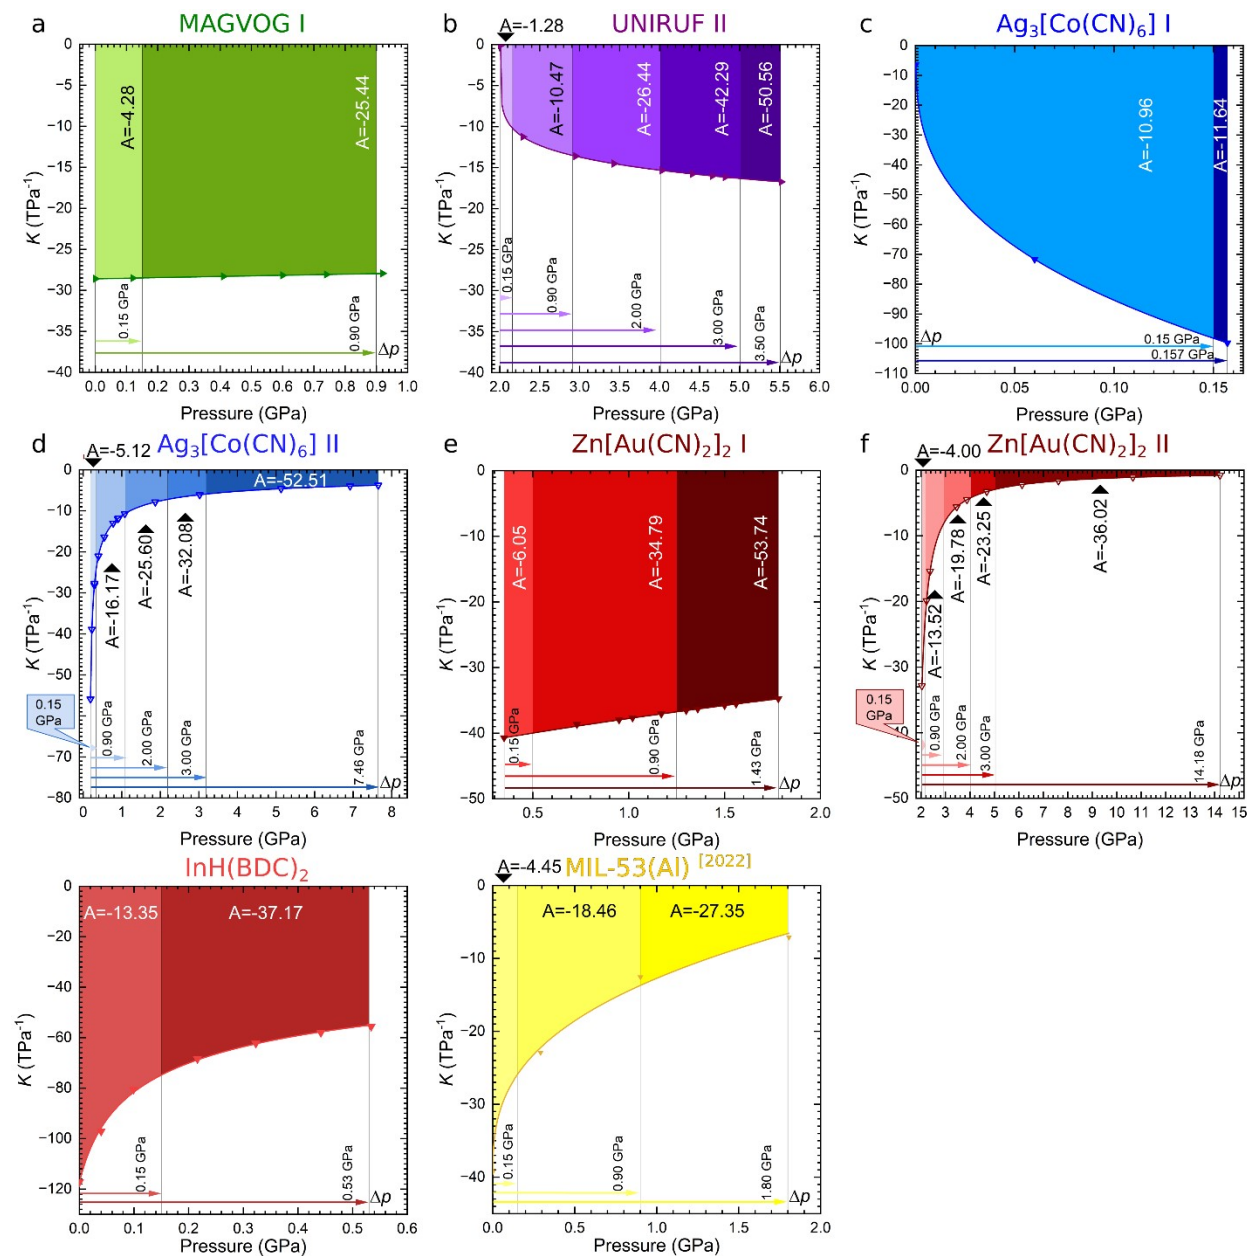

Figure S10. Evolution of compressibility with pressure for selected NLC materials (Part 2). Names of the compounds are included above the respective graphs. The names of the compounds are followed by information about polymorph (where applicable): yellow - yellow polymorph; hp - high-pressure polymorph; I- Phase I; II- Phase II. The arrows mark the  $\Delta p$  widths for which integration was done, with the results of the integration also included in the figure (the color of the arrow corresponds to the color of the area between function and top axis). For each compound, same  $p_{\min}$  was selected for integration

and only  $p_{\max}$  progressively increases (the areas for different integrations overlap, with the area for wider  $\Delta p$  being partially covered by areas marking preceding integrations). As compressibility  $K$  is expressed in  $\text{TPa}^{-1}$  and pressure in GPa, the values included in the graphs should be multiplied by  $10^{-3}$  to allow for unit conversion. Those corrected values can be multiplied by  $10^2$  to express them in %.

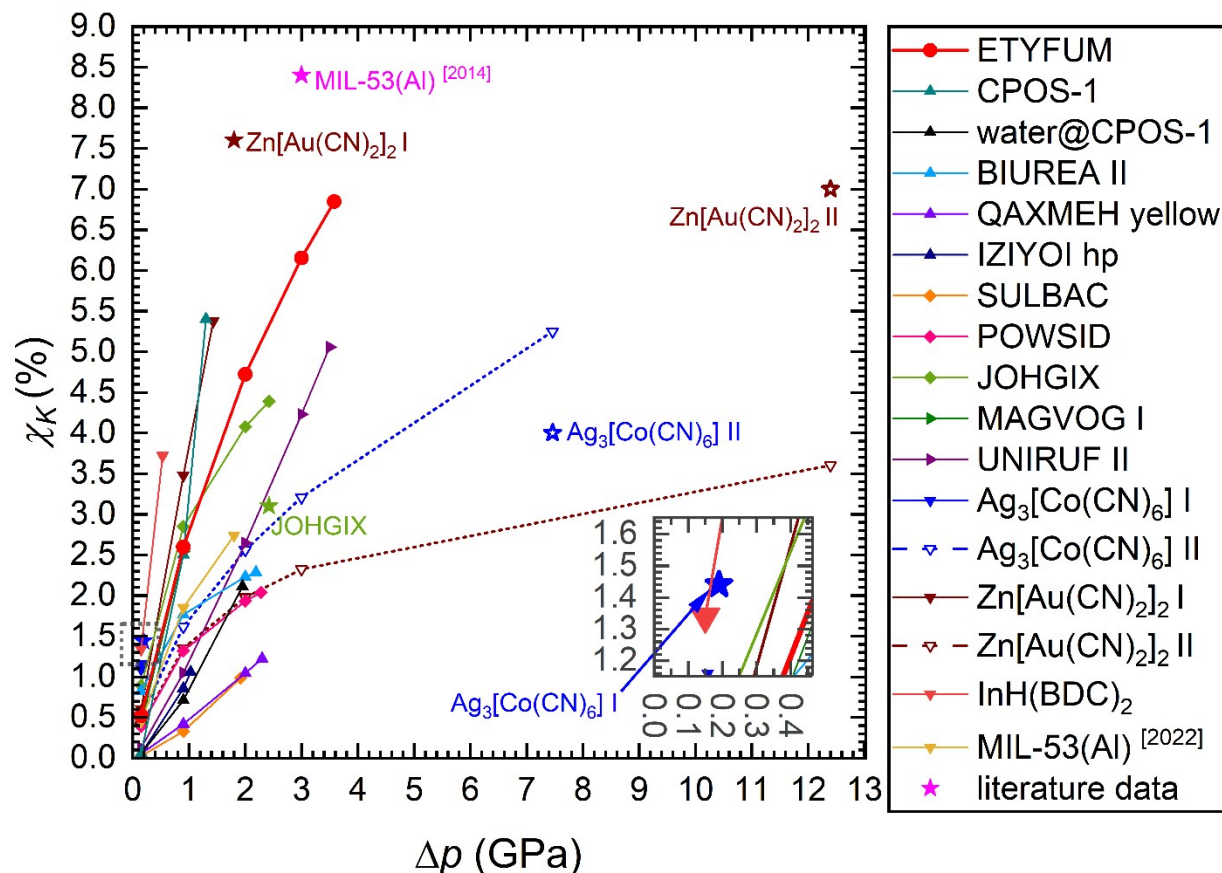

Figure S11. Evolution of compressibility capacity ( $\chi_k$ ) with pressure for selected NLC materials. Literature data where  $\chi_k$  was listed for the complete investigated pressure range are marked with star symbols at the  $\Delta p$  corresponding to the width of the investigated pressure range, and are labelled with the name of the compound in corresponding color. Where possible materials are referenced by their REFCODES from Cambridge Structure Database (CSD)<sup>18</sup>. The names of the compounds are followed by information about polymorph (where applicable): yellow - yellow polymorph; hp - high-pressure polymorph; I- Phase I; II- Phase II. In case two polymorphs exhibit NLC, both are plotted in the same color but phases from higher pressure is represented with dashed lines. Symbol shape corresponds to the type of the crystal: circle – ETYFUM; triangle - organic crystals, diamond – metal complexes, right-side triangle - inorganic-organic frameworks and coordination polymers selected from CSD datamining results; upside-down triangle – other framework materials selected from previous reports.

## References

- 1 CrysAlisPro, Rigaku Oxford Diffraction (version 1.171.41.93a) Rigaku Oxford Diffraction, Rigaku Oxford Diffraction 2020.
- 2 L. Merrill and W. A. Bassett, *Review of Scientific Instruments*, 1974, **45**, 290–294.
- 3 Daphne Oil 7575 Data sheet, .
- 4 G. J. Piermarini, S. Block, J. D. Barnett and R. A. Forman, *Journal of Applied Physics*, 1975, **46**, 2774–2780.
- 5 A. Budzianowski and A. Katrusiak, in *High-Pressure Crystallography*, eds. A. Katrusiak and P. McMillan, Springer Netherlands, Dordrecht, 2004, pp. 101–112.
- 6 K. Knížek, Kalvados <https://www.fzu.cz/~knizek/kalvados/index.html>.
- 7 OriginPro (version Version 2022b) OriginLab Corporation, Northampton, MA, USA.
- 8 C. F. Macrae, I. Sovago, S. J. Cottrell, P. T. A. Galek, P. McCabe, E. Pidcock, M. Platings, G. P. Shields, J. S. Stevens, M. Towler and P. A. Wood, *J Appl Cryst*, 2020, **53**, 226–235.
- 9 G. M. Sheldrick, *Acta Cryst A*, 2015, **71**, 3–8.
- 10 G. M. Sheldrick, *Acta Cryst A*, 2008, **64**, 112–122.
- 11 G. M. Sheldrick, *Acta Cryst C*, 2015, **71**, 3–8.
- 12 O. V. Dolomanov, L. J. Bourhis, R. J. Gildea, J. A. K. Howard and H. Puschmann, *Journal of Applied Crystallography*, 2009, **42**, 339–341.
- 13 F. Kleemiss, O. V. Dolomanov, M. Bodensteiner, N. Peyerimhoff, L. Midgley, L. J. Bourhis, A. Genoni, L. A. Malaspina, D. Jayatilaka, J. L. Spencer, F. White, B. Grundkötter-Stock, S. Steinhauer, D. Lentz, H. Puschmann and S. Grabowsky, *Chem. Sci.*, 2021, **12**, 1675–1692.
- 14 L. Midgley, L. J. Bourhis, O. V. Dolomanov, S. Grabowsky, F. Kleemiss, H. Puschmann and N. Peyerimhoff, *Acta Cryst A*, 2021, **77**, 519–533.
- 15 F. Neese, F. Wennmohs, U. Becker and C. Riplinger, *The Journal of Chemical Physics*, 2020, **152**, 224108.
- 16 M. J. Cliffe and A. L. Goodwin, *J Appl Cryst*, 2012, **45**, 1321–1329.
- 17 M. Lertkiattrakul, M. L. Evans and M. J. Cliffe, *Journal of Open Source Software*, 2023, **8**, 5556.
- 18 C. R. Groom, I. J. Bruno, M. P. Lightfoot and S. C. Ward, *Acta Cryst B*, 2016, **72**, 171–179.
- 19 Q. Zeng, K. Wang and B. Zou, *J. Am. Chem. Soc.*, 2017, **139**, 15648–15651.
- 20 D. Jiang, T. Wen, Y. Guo, J. Liang, Z. Jiang, C. Li, K. Liu, W. Yang and Y. Wang, *Chem. Mater.*, 2022, **34**, 2764–2770.
- 21 A. B. Cairns and A. L. Goodwin, *Phys. Chem. Chem. Phys.*, 2015, **17**, 20449–20465.
- 22 R. Dennington, T. A. Keith and ohn M. Millam, GaussView (version 6) Semichem Inc., Shawnee Mission, KS 2016.
- 23 M. J. Frisch, G. W. Trucks, H. B. Schlegel, G. E. Scuseria, M. A. Robb, J. R. Cheeseman, G. Scalmani, V. Barone, G. A. Petersson, H. Nakatsuji, X. Li, M. Caricato, A. V. Marenich, J. Bloino, B. G. Janesko, R. Gomperts, B. Mennucci, H. P. Hratchian, J. V. Ortiz, A. F. Izmaylov, J. L. Sonnenberg, D. Williams-Young, F. Ding, F. Lipparini, F. Egidi, J. Goings, B. Peng, A. Petrone, T. Henderson, D. Ranasinghe, V. G. Zakrzewski, J. Gao, N. Rega, G. Zheng, W. Liang, M. Hada, M. Ehara, K. Toyota, R. Fukuda, J. Hasegawa, M. Ishida, T. Nakajima, Honda, O. Kitao, H. Nakai, T. Vreven, K. Throssell, J. A. Montgomery Jr., J. E. Peralta, F. Ogliaro, M. J. Bearpark, J. J. Heyd, E. N. Brothers, K. N. Kudin, V. N. Staroverov, T. A. Keith, R. Kobayashi, J. Normand, K. Raghavachari, A. P. Rendell, J. C. Burant, S. S. Iyengar, J. Tomasi, M. Cossi, J. M. Millam, M. Klene, C. Adamo, R. Cammi, J. W. Ochterski, R. L. Martin, K. Morokuma, O. Farkas, J. B. Foresman and D. J. Fox, Gaussian (version 16 C.01) Gaussian, Inc., Wallingford CT 2016.
- 24 A. L. Goodwin, D. A. Keen and M. G. Tucker, *Proc. Natl. Acad. Sci. U.S.A.*, 2008, **105**, 18708–18713.
- 25 W. Cai and A. Katrusiak, *Nat Commun*, 2014, **5**, 4337.
- 26 H. H.-M. Yeung, R. Kilmurray, C. L. Hobday, S. C. McKellar, A. K. Cheetham, D. R. Allan and S. A. Moggach, *Phys. Chem. Chem. Phys.*, 2017, **19**, 3544–3549.

- 27 S. Sobczak, A. Półrolniczak, P. Ratajczyk, W. Cai, A. Gładysiak, V. I. Nikolayenko, D. C. Castell, L. J. Barbour and A. Katrusiak, *Chem. Commun.*, 2020, **56**, 4324–4327.
- 28 C. H. Woodall, C. M. Beavers, J. Christensen, L. E. Hatcher, M. Intissar, A. Parlett, S. J. Teat, C. Reber and P. R. Raithby, *Angew Chem Int Ed*, 2013, **52**, 9691–9694.
- 29 A. B. Cairns, J. Catafesta, C. Levelut, J. Rouquette, A. van der Lee, L. Peters, A. L. Thompson, V. Dmitriev, J. Haines and A. L. Goodwin, *Nature Materials*, 2013, **12**, 212–216.
- 30 J. J. Shephard, V. E. J. Berryman, T. Ochiai, O. Walter, A. N. Price, M. R. Warren, P. L. Arnold, N. Kaltsoyannis and S. Parsons, *Nat Commun*, 2022, **13**, 5923.
- 31 C. L. Bull, N. P. Funnell, C. J. Ridley, C. R. Pulham, P. L. Coster, J. P. Tellam and W. G. Marshall, *CrystEngComm*, 2019, **21**, 5872–5881.
- 32 H. J. Shepherd, T. Palamarciuc, P. Rosa, P. Guionneau, G. Molnár, J.-F. Létard and A. Bousseksou, *Angew. Chem. Int. Ed.*, 2012, **51**, 3910–3914.
- 33 E. L. Harty, A. R. Ha, M. R. Warren, A. L. Thompson, D. R. Allan, A. L. Goodwin and N. P. Funnell, *Chem. Commun.*, 2015, **51**, 10608–10611.
- 34 Y. Zhao, C. Fan, C. Pei, X. Geng, G. Xing, T. Ben and S. Qiu, *J. Am. Chem. Soc.*, 2020, **142**, 3593–3599.
- 35 I. E. Collings and M. Hanfland, *Molecules*, 2019, **24**, 1759.
- 36 W. Zieliński and A. Katrusiak, *Crystal Growth & Design*, 2014, **14**, 4247–4253.
- 37 A. Olejniczak, K. Krukle-Berziņa and A. Katrusiak, *Crystal Growth & Design*, 2016, **16**, 3756–3762.
- 38 E. Marelli, N. Casati, F. Gozzo, P. Macchi, P. Simoncic and A. Sironi, *CrystEngComm*, 2011, **13**, 6845–6849.
- 39 E. A. Kapustin, V. S. Minkov and E. V. Boldyreva, *Acta Crystallogr B Struct Sci Cryst Eng Mater*, 2014, **70**, 517–532.
- 40 M. Szafranski, *J. Phys. Chem. C*, 2020, **124**, 11631–11638.
- 41 N. E. Bogdanov, D. V. Korabel'nikov, I. A. Fedorov, B. A. Zakharov and E. V. Boldyreva, *Acta Crystallogr B Struct Sci Cryst Eng Mater*, 2022, **78**, 756–762.
- 42 J. M. Ogborn, I. E. Collings, S. A. Moggach, A. L. Thompson and A. L. Goodwin, *Chem. Sci.*, 2012, **3**, 3011.
- 43 W. Cai, A. Gładysiak, M. Anioła, V. J. Smith, L. J. Barbour and A. Katrusiak, *J. Am. Chem. Soc.*, 2015, **137**, 9296–9301.
- 44 I. E. Collings, R. S. Manna, A. A. Tsirlin, M. Bykov, E. Bykova, M. Hanfland, P. Gegenwart, S. Van Smaalen, L. Dubrovinsky and N. Dubrovinskaia, *Phys. Chem. Chem. Phys.*, 2018, **20**, 24465–24476.
- 45 I. E. Collings, M. Bykov, E. Bykova, M. G. Tucker, S. Petitgirard, M. Hanfland, K. Glazyrin, S. Van Smaalen, A. L. Goodwin, L. Dubrovinsky and N. Dubrovinskaia, *CrystEngComm*, 2016, **18**, 8849–8857.
- 46 Y. Yan, A. E. O'Connor, G. Kanthasamy, G. Atkinson, D. R. Allan, A. J. Blake and M. Schröder, *J. Am. Chem. Soc.*, 2018, **140**, 3952–3958.
- 47 A. Półrolniczak and A. Katrusiak, *Mater. Adv.*, 2021, **2**, 4677–4684.
- 48 A. Półrolniczak, S. Sobczak, V. I. Nikolayenko, L. J. Barbour and A. Katrusiak, *Dalton Trans.*, 2021, **50**, 17478–17481.
- 49 S. A. Moggach, T. D. Bennett and A. K. Cheetham, *Angewandte Chemie International Edition*, 2009, **48**, 7087–7089.
- 50 S. Sobczak and A. Katrusiak, *Crystal Growth & Design*, 2018, **18**, 1082–1089.
